1 **Metabolic Complementation between Glucose and Amino Acid**

2 **Drives Hepatic *De Novo* Lipogenesis and Steatosis**

3 **Yilie Liao<sup>1,2</sup>, Lei Liu<sup>1</sup>, Honghao Li<sup>1</sup>, Xiaojie Bai<sup>1</sup>, Fangfang Sun<sup>1</sup>, Xia Xiao<sup>1</sup>,**

4 **Suneng Fu<sup>1,2\*</sup>**

5 <sup>1</sup>School of Life Sciences, Tsinghua University, Beijing, China 100084

6 <sup>2</sup>Center for Neurometabolism and Regenerative Medicine, Bioland Laboratories, Guangdong,

7 China 510530

8 **\*Correspondence:** fu\_suneng@grmh-gdl.cn (S.F.)

9

10 **Abstract**

11 Increased *de novo* lipogenesis (DNL) is a hallmark of nonalcoholic fatty liver disease (NAFLD) in obesity,  
12 but the macronutrient source for >80% carbon backbone for fatty acid synthesis has not been determined.  
13 Here we take an integrated approach to dissect nutrient metabolism, both *ex vivo* and *in vivo*. We discover  
14 a castling effect of glucose and glutamine metabolism through *ex vivo* isotope tracing studies that limits the  
15 entrance of glucose carbon into the glutamine-dominated tricarboxylic acid cycle (TCA) and DNL  
16 pathways. *In vivo* tracing studies with a high carbohydrate drink (glucose/amino acid, 3:1, *w/w*) confirm  
17 dietary amino acids are twice more efficient than glucose in labeling the hepatic acetyl-CoA and fatty acid  
18 pool, and together they account for over 70% of hepatic DNL substrate. Both glucose and glutamine carbon  
19 flux into DNL pathways are increased in obese hepatocytes, and metabolic rerouting of substrate carbon  
20 toward glycogen synthesis and energy production through GYS2 and GLUD1 overexpression improves  
21 hepatic steatosis. Together, these data reveal the quantitative contribution of glucose and amino acid carbon  
22 toward hepatic DNL and the development of hepatic steatosis in obesity.

23

## 24 Introduction

25 Nonalcoholic fatty liver disease (NAFLD) encompasses a continuum of liver pathology that starts with  
26 excessive triglyceride accumulation (hepatic steatosis) and gradually progresses toward inflammation  
27 (steatotic hepatitis), fibrosis, and even cirrhosis<sup>1,2</sup>. NAFLD is strongly associated with diabetes<sup>3</sup> and  
28 cardiovascular diseases<sup>4</sup>, and it is the most frequent cause of abnormal liver function, accounts for more  
29 than 25% of hepatic carcinoma<sup>5</sup> and ~20% of end-stage liver failure<sup>6</sup>. The global prevalence of NAFLD  
30 has reached 25%, but there is no drug presently on the market for treatment<sup>7,8</sup>.

31 Obesity and insulin resistance are the leading causes of NAFLD<sup>7</sup>. Obesity may promote the development  
32 of NAFLD by supplying adipose-derived free fatty acids to the liver. It is estimated that more than 60% of  
33 fatty acids in the liver is sourced from the adipose tissue<sup>9</sup>, and adipose lipolysis is increased in obese and  
34 insulin resistant state<sup>10,11</sup>. Re-esterification of adipose-derived free fatty acids into triglyceride requires  
35 glycerol moieties that may be sourced from the adipose or synthesized in situ through glyceroneogenesis  
36 and glycolytic pathways<sup>12-14</sup>. DNL is upregulated in animal models of obesity as well as obese patients, and  
37 it is the only source of fatty acid that is significantly increased under obese conditions<sup>15</sup>.

38 The obese state drives DNL through multiple mechanisms, but the principle substrate source of DNL and  
39 its regulation in the obese state remains unsettled<sup>16</sup>. Work by Clark and colleagues showed that glucose and  
40 fructose were not suitable for DNL in primary hepatocytes when compared to lactate, pyruvate, acetate,  
41 and alanine<sup>17</sup>. In rat intravenous infusion models, the estimated contribution of glucose toward cytosolic  
42 acetyl-CoA synthesis and lipogenesis ranged from 70% to 3~5%<sup>18-20</sup>. In human, the majority of excess  
43 carbohydrate is stored as glycogen, and only 1-2% of a carbohydrate meal is converted to lipids<sup>21,22</sup>. A  
44 recent fluxomics study of 15 nutrients fail to label fatty acids *in vivo*<sup>23</sup>.

45 Through a series of flux and genetic analyses, here we examine the quantitative contribution of glucose and  
46 amino acids toward fatty acid synthesis and the development of hepatic steatosis in obesity.

47

## 48 **Hepatic glucose flux is restricted from the TCA cycle**

49 Glucose has many metabolic fates and it is remotely placed from the tricarboxylic acid (TCA) cycle and  
50 the *de novo* lipogenesis (DNL) pathway (Fig. 1a). We performed flux analysis of uniformly-labeled glucose  
51 ([U-<sup>13</sup>C]Glc) to track its kinetics and fate of metabolism in primary hepatocytes and examine its potential  
52 remodeling during the development of nonalcoholic fatty liver disease (NAFLD) in the leptin-deficient,  
53 *ob/ob* mice model.

54 Primary hepatocytes were first isolated from the wild-type, lean and *ob/ob* mice and fasted for 45 minutes  
55 to deplete intracellular glucose and glycogen (Supplementary Fig. 1a). A 10mM, <sup>13</sup>C-labeled glucose was  
56 then added into a fresh tracing medium, and samples were collected at a series of time points after medium  
57 replacement, analyzed by liquid chromatography-mass spectrometry (LC-MS). The uptake of glucose was  
58 rapid and plateaued after two minutes (Fig. 1b). At the 10-minute time point, the upper part of glycolysis  
59 also reached a plateau (Fig. 1c, d; Supplementary Fig. 1b), while the lower part continued to increase toward  
60 the 30-minute mark (Fig. 1e-g; Supplementary Fig. 1c). Lactate and glycerol-3-phosphate are two major  
61 carbon sinks for glycolysis, and both of them were accumulated 2-3 times faster in the obese mice primary  
62 hepatocytes than in the lean (Fig. 1f-h). Intriguingly, the PPP metabolite ribose-5-phosphate (R5P) was  
63 accumulated faster in the lean than in the obese primary hepatocyte (Fig. 1i), possibly due to  
64 hyperactivation of the downstream non-oxidative PPP (sedoheptulose-7-phosphate, S7P, Fig. 1j) and  
65 purine synthesis pathway (inosine-5-monophosphate, IMP, Supplementary Fig. 1d). Fluxing the primary  
66 hepatocytes in a complete medium supplemented with amino acids reduced the fractional labeling of many  
67 of the metabolites, but the overall difference between lean and obese primary hepatocytes remained  
68 (compare Supplementary Fig. 1b-h in minimal medium to Supplementary Fig. 1i-o in complete medium),  
69 suggesting that the nutritional status did not perturb the endogenous metabolic program in a significant way.  
70 The authenticity of flux analysis was further corroborated by the observation that glycolytic metabolites  
71 from the obese liver tissues are uniformly higher than from the lean tissues (Fig. 1k).

72 Despite the near complete labeling of pyruvate by glucose (Fig. 1l), the labeling efficiency of acetyl-CoA  
73 and TCA cycle intermediates was very low (Fig. 1m, n; Supplementary Fig. 1q-s), suggesting the pyruvate  
74 dehydrogenase (PDH) activity being rate-limiting. Nonetheless, the expected effect of hyperinsulinemia on  
75 PDH was preserved in the obese primary hepatocytes, as glucose labeling of the majority of TCA cycle  
76 intermediates trended upwards (Fig. 1m, n). By measuring the oxygen consumption rate (OCR), we were  
77 able to confirm that mitochondrial glucose oxidation was indeed increased in the obese primary hepatocyte  
78 (Fig. 1o).

79 Therefore, the development of obesity seems to increase all aspect of glucose catabolism (Fig. 1p). The  
80 hyperactivation of glucose catabolism exerts spill-over effects by enhancing the *de novo* synthesis of non-  
81 essential amino acids (Supplementary Fig. 1h), and it reduces amino acid catabolism toward the  
82 gluconeogenic and glyceroneogenic pathways (Fig. 1p).

83

#### 84 **Glutamine flux concentrates around the TCA cycle**

85 To directly assess the fate and flux of amino acid metabolism, we traced the uniformly labeled glutamine  
86 ( $[U-^{13}C, ^{15}N]Gln$ ) in both lean and obese primary hepatocytes at 2.5mM concentrations (Fig. 2a).

87 Glutamine is first metabolized to glutamate through glutaminolysis (Fig. 2b, Supplementary Fig. 3a-c) and  
88 then converted to  $\alpha$ -ketoglutarate ( $\alpha$ -KG) through either transamination or oxidative deamination pathways  
89 (Fig. 2b, c);  $\alpha$ -ketoglutarate may then enter TCA cycle for oxidation in the mitochondria (forward, Fig. 2d),  
90 or go through reductive carboxylation (backward, Fig. 2e) for the synthesis of citrate toward DNL in the  
91 cytosol. The carbon backbones of glutamine entering into TCA cycle may also exit at the level of  
92 oxaloacetate (OAA), which may re-enter the TCA cycle through pyruvate cycling (Fig. 2f), be converted  
93 into aspartate (Asp) through transamination reactions (Fig. 2g), or participate in  
94 glyceroneogenesis/gluconeogenesis pathways (Fig. 2h).

95 The supplement of 2.5mM glutamine ([U-<sup>13</sup>C, <sup>15</sup>N]Gln) in the tracing medium led to a rapid appearance  
96 and dominance of labeled glutamine and glutamate in the intracellular pool (Supplementary Fig. 3b, c).  
97 Although the 2.5mM glutamine concentration used herein is higher than the physiological level of  
98 glutamine in circulation, it only caused a transient spike in the intracellular glutamine pool, and no elevation  
99 in glutamate concentration was observed, suggesting the presence of an inherent mechanism in maintaining  
100 cellular glutamine levels.

101 The labeled glutamine carbon then rapidly entered the TCA cycle and plateaued at ~10 minutes (Fig. 2d,  
102 e). The continued accumulation of  $\alpha$ -KG after the 10 minute time point (Fig. 2c) suggests the combined  
103 activity of glutamate transamination and oxidative deamination pathways exceeded  $\alpha$ -KG consumption  
104 rates. At steady state, the fraction of TCA metabolites labeled by glutamine-derived carbon reached ~40%,  
105 5-10 times higher than that of glucose (Fig. 2b). The fate of glutamine metabolism was similar when the  
106 primary hepatocytes were cultured under either complete (Fig. 2c-h, Supplementary Fig. 3a) or minimal  
107 media conditions (Supplementary Fig. 3b-i). But the TCA intermediate accumulation was slower in the  
108 minimal medium, suggesting the presence of glucose suppressed cataplerosis of glutamine catabolite from  
109 TCA.

110 The development of obesity hastened the kinetics of glutamine entrance into the TCA cycle (Fig. 2d-f),  
111 although the accumulation of  $\alpha$ -KG was slower in the obese primary hepatocytes (Fig. 2c), again  
112 confirming  $\alpha$ -KG production was not rate-limiting in glutamine catabolism. The intermediates generated  
113 from reductive carboxylation direction (backward) was accumulated more significantly than forward TCA  
114 metabolites (Fig. 2e, Supplementary Fig. 3f). The effect of obesity on glutamine catabolism pathways  
115 entering and exiting the TCA cycle, however, differed significantly. As shown in Fig. 2g and  
116 Supplementary Fig. 3j, the synthesis of aspartate, either from glutamate derived carbon backbone (M+4)  
117 or donated amine group (M+1), increased sharply in the obese primary hepatocytes, suggesting an  
118 upregulated transamination to facilitate glutamine catabolism. Similarly, the returning of OAA carbon  
119 toward aerobic glycolysis (lactate, Fig. 2h) or TCA cycle (pyruvate cycling, Fig. 2g, Supplementary Fig.

120 3g) through the cataplerosis pathway was increased. In contrast, the synthesis of glycerol-3P from  
121 glutamine through the glyceroneogenic route decreased in the obese primary hepatocytes (Supplementary  
122 Fig. 3i). The reduction in glutamine glyceroneogenesis coincided with induction of glycolysis in the obese  
123 primary hepatocytes, suggesting a partial replacement of glutamine footprint by glucose in the obese state.  
124 Therefore, unlike glucose, the carbon flux of glutamine is concentrated in and around the TCA cycle, and  
125 the metabolic profile of glutamine carbon is further compressed in the obese primary hepatocytes through  
126 a coordinated metabolic reprogramming that results in an overall reduction in glyceroneogenesis.

127

### 128 **Glutamine, not glucose, is the principle substrate for oxidative respiration in hepatocytes**

129 The flux analyses above revealed distinct rate-limiting steps of glucose and glutamine metabolism toward  
130 the TCA cycle: PDH for glucose and  $\alpha$ -ketoglutarate consumption for glutamine. As a result, albeit the  
131 kinetics of TCA intermediates labeling by glucose and glutamine did not differ significantly (Fig. 3a;  
132 Supplementary Fig. 1q-s, Supplementary Fig. 3d, e; Supplementary Fig. 4a), their steady-state labeling  
133 efficiency differed for about tenfold (less than 5% by glucose vs. ~50% by glutamine, Fig. 3b;  
134 Supplementary Fig. 4b).

135 Oxidative phosphorylation in the liver primarily depends on complex II of the electron transport chain<sup>24</sup>,  
136 and glutamine catabolism is proximally positioned toward complex II in four enzymatic steps. However,  
137 amino acid was not considered as the main substrate for energy production. To independently measure  
138 substrate contribution toward the TCA cycle, we compared mitochondria respiration in the presence or  
139 absence of inhibitors for transaminases (aminooxyacetate, AOA), pyruvate transporters (UK5099, UK),  
140 and fatty acid transporters (Etomoxir, Eto) (Fig. 3c, Supplementary Fig. 4c-f). As quantified in Fig. 3d, the  
141 amino acid (33%) is the single most dominant substrate oxidized by mitochondria, followed by fatty acids  
142 (12.4%) and pyruvate (4%, used as a surrogate for glucose). The contribution of pyruvate toward  
143 mitochondria respiration was doubled to 8.7% in the obese primary hepatocytes (Fig. 3d), similar to the  
144 glucose labeling efficiency of TCA intermediates under the same condition (Fig. 3b). Only after the addition

145 of the mitochondria respiration uncoupling reagent, pyruvate may enter the TCA cycle in a significant  
146 amount (36.4%, Fig. 3d, maximal), possibly due to the removal of product (NADH) inhibition at the level  
147 of PDH.

148 We further applied OpenMebius flux modeling<sup>25</sup> to understand the interaction between glucose and  
149 glutamine metabolism and how obesity modifies their interaction. Modeling analysis confirmed glutamine  
150 as a larger contributor to TCA cycle than glucose. The calculated rate of glycolysis (glucose to pyruvate)  
151 in lean mice primary hepatocytes was only 1/2 to 1/3 of the rate of glutamine catabolism to  $\alpha$ -ketoglutarate  
152 (Fig. 3e; Supplementary Fig. 4g; Supplementary Table 1). By comparing flux rates in glucose and  
153 glutamine tracing in the minimal medium, we further identified a two-way interaction between glucose and  
154 glutamine metabolism. On the one hand, glucose stimulated glutamine utilization through glutaminolysis,  
155 oxidation, and reductive carboxylation (Supplementary Table 1). On the other hand, glutamine suppressed  
156 glycolysis and pyruvate oxidation but increased lactate production (Supplementary Table 1). The  
157 development of obesity had distinct effects on glucose and glutamine metabolism: it tripled the rate of  
158 glycolysis (glucose-pyruvate increased from 6.27 to 19.88 $\mu$ mol/g/min), and more than quadrupled (from  
159 6.89 to 29.81 $\mu$ mol/g/min) the reductive carboxylation of glutamate, but the rate of glutamate oxidation was  
160 significantly reduced (from 17.85 to 6.76  $\mu$ mol/g/min; Supplementary Fig. 4g; Supplementary Table 1).  
161 Together, these results suggest glucose stimulates glutamine utilization while glutamine complements  
162 (through gluconeogenesis) and competes (by preventing pyruvate entrance into TCA) with glucose  
163 metabolism. The development of obesity increases the overall flux by elevating gluconeogenesis,  
164 lipogenesis and lactate production.

165

## 166 **Glutamine is a prominent carbon supplier for hepatic DNL**

167 Citrate synthesized in the TCA cycle may be used for substrate oxidation or lipogenesis. The revelation  
168 that amino acid but not glucose is the main substrate of oxidative phosphorylation led us to review another



169 long-held view that carbohydrates drive lipogenesis. We applied similar, side-by-side comparative flux  
170 analysis of glucose and glutamine toward the synthesis of triglyceride fatty acid in primary hepatocytes  
171 isolated from overnight-fed, lean and obese (*ob/ob*) mice (Fig. 4a). We chose high-glucose (15mM), high-  
172 glutamine (3.2mM), and high-insulin conditions with a physiological level (hepatic portal vein) of acetate  
173 (0.61mM) to sustain lipogenesis *ex vivo*<sup>26,27</sup>. The duration of labeling was extended to 6 hours to increase  
174 labeling efficiency, without compromising the expression of key enzymes (Supplementary Fig. 5a). The  
175 overall fatty acid pool was also reflective of its lipogenic signature in that the primary DNL products of  
176 palmitate (C16:0) and oleate (C18:1) were highly elevated in the obese primary hepatocyte compared to  
177 that of lean, whereas the essential fatty acids including linoleic (C18:2) and arachidonic acid (C20:4) did  
178 not differ between lean and obese primary hepatocytes (Supplementary Fig. 5b).

179 Consistent with their distinct efficiency in citrate labeling, glutamine but not glucose-derived <sup>13</sup>C was  
180 readily incorporated into palmitate in the lean mice primary hepatocytes (Fig. 4b; Supplementary Fig. 5c).  
181 Notably, isotopic enrichments of top ranked FA from glutamine (<sup>13</sup>C<sub>5</sub>, <sup>15</sup>N<sub>2</sub>) ranged from 5%-22%,  
182 overwhelmingly greater than the 0.2-2.6% enrichment of the glucose-derived <sup>13</sup>C carbons (Fig. 4d).  
183 Glucose incorporation increased by fivefold in the obese primary hepatocytes (Fig. 4b, c), more than the  
184 overall increase of glycolysis and citrate labeling under the same conditions. As a result, the fractional  
185 contribution of glucose to palmitate synthesis was almost doubled in the obese primary hepatocytes (Fig.  
186 4d, Supplementary Fig. 5c) despite an almost three-fold increase in the total triglyceride-palmitate levels  
187 (Fig. 4b). The obesity-induced increase of glutamine flux into palmitate was not as substantial (Fig. 4b-d),  
188 and its fractional contribution was reduced (Fig. 4d; Supplementary Fig. 5c). Still, the overall contribution  
189 of glutamine toward palmitate synthesis remained about three times higher than that of glucose (Fig. 4d).

190 Oleate (C18:1), palmitoleate (C16:1), stearate (C18:0) are immediate elongation and desaturation products  
191 of palmitate, and all of them were adequately labeled (Fig. 4c, d; Supplementary Fig. 5d-f). However, the  
192 ratio of newly synthesized unsaturated *vs.* saturated fatty acids (C16:1/C16:0 and C18:1/C18:0) was higher  
193 in the obese primary hepatocytes (Fig. 4e), suggesting increased desaturation in the obese than the lean. In

194 contrast, the ability of the obese primary hepatocytes to elongated fatty acids was significantly  
195 compromised. The lean mice primary hepatocytes synthesized more C20-24 than their obese counterparts  
196 (Fig. 4f) despite their much lower DNL activity. Consequently, the overall composition of very long chain  
197 fatty acids (VLCFA) was reduced in the obese primary hepatocytes (Supplementary Fig. 5g). A mixture of  
198 amino acids other than glutamine was also able to readily label palmitate in the primary hepatocytes,  
199 suggesting amino acids as a whole are important DNL substrates (Supplementary Fig. 5h), and a similar  
200 deficiency in fatty acid elongation was observed in obese primary hepatocytes in mixed amino acid tracing  
201 experiments (Supplementary Fig. 5i).

202 The preferred incorporation of glutamine over glucose carbon into DNL products was not affected by  
203 dietary conditions, as primary hepatocytes isolated from high-fat diet (HFD)-fed mice exhibited a similar  
204 preference (Supplementary Fig. 6). Nor was it driven by high glutamine concentration in the tracing  
205 medium either. As shown in Supplementary Fig. 7a-c, regardless of culture medium glutamine  
206 concentration, the intracellular glutamine concentration of primary hepatocytes remained significantly  
207 lower than that of liver tissues, whereas the glutamate pool was modestly higher. Additionally, an increase  
208 of glutamine concentration in the culture medium from 0.5mM to 2.5mM did not suppress glucose entry  
209 into the DNL pathway at the level of pyruvate dehydrogenase nor induce lipogenic enzyme expression  
210 (Supplementary Fig. 7d, e). This is further supported by the observation that changes in tracing glutamine  
211 concentration affected the labeling efficiency of intracellular glutamine (Supplementary Fig. 7b) and fatty  
212 acid pool (Supplementary Fig. 7f), but not the overall contribution of glutamine toward DNL  
213 (Supplementary Fig. 7g).

214 Current computational methods do not work well for short-term, low-efficiency labeling experimental  
215 systems<sup>28-30</sup>, and primary hepatocytes studied herein are not amenable to long-term studies due to their  
216 propensity for de-differentiation. A major reason is fitting background level mass isotopomer distribution  
217 (MID) led to arbitrarily high *D* values and compressed *S* values<sup>28</sup>. For example, the percentile of newly  
218 synthesized palmitate (*S*%) calculated by the Fatty Acid Source Analysis (FASA)<sup>31</sup> in the <sup>13</sup>C-glucose trace

219 experiment was a mere 0.04%, far lower than the 1.64% of newly synthesized palmitate containing  $^{13}\text{C}$ -  
220 glucose-derived C2 units (mass isotopomer enrichment, MIE, Supplementary Fig. 7h), which should be a  
221 fraction of the former.

222 To avoid over-fitting of the background level mass isotopomer distribution signal, we opted to aggregate  
223 isotopomer signals to estimate the fractional contribution of the labeled substrate as well as the rate of DNL  
224 (Fig. 4g and h; see “Mass Isotopomer Enrichment (MIE)-based Estimate of DNL” in the Methods section).  
225 Through this method, we estimated that the fractional contribution ( $D\%$ ) of  $^{13}\text{C}$ -labeled glutamine toward  
226 palmitate was between 15~17% in the lean mice primary hepatocytes as well as the HFD and *ob/ob* mice,  
227 all of which were much higher than those of  $^{13}\text{C}$ -labeled glucose (Fig. 4g; Supplementary Fig. 7i).  
228 Increasing  $^{13}\text{C}$ -glucose concentration from 10mM to 20mM boosted the fractional contribution of glucose  
229 to ~9% (Supplementary Fig. 7j), suggesting a non-linear contribution under hyperglycemia conditions.

230 The amount of palmitate synthesized ( $S\%$ ) during the 6h tracing period was estimated to be ~10% of the  
231 total palmitate pool, and it was slightly lower in the obese primary hepatocytes than in the lean (Fig. 4h),  
232 reflective of their much larger intracellular triglyceride pool. Importantly, the difference between the  
233 estimated  $S\%$  under glucose and glutamine tracing conditions was much smaller compared to that of the  
234 FASA method (compare Fig. 4h and Supplementary Fig. 7j), another indication that the MIE method  
235 overperforms MID for low-efficiency labeling studies.

236

### 237 **Quantitative contribution of glucose and amino acid carbon toward lipogenesis *in vivo***

238 Metabolism does not occur in isolation, and dietary nutrients may contribute to hepatic metabolism  
239 indirectly after initial transformation in other tissues<sup>32,33</sup>. Therefore, we conducted dietary glucose and  
240 amino acid tracing through drink to examine the physiological absorption and metabolism of nutrients *in*  
241 *vivo* (Fig. 5a-j; Supplementary Fig. 8a-i).

242 We first examined glucose absorption and metabolism in mice fed with 15% uniformly labeled,  $^{13}\text{C}$ -glucose  
243 ( $[\text{U-}^{13}\text{C}]\text{Glc}$ ) supplemented with 5% unlabeled amino acid mixture (Fig. 5a; Supplementary Fig. 8a). Mass  
244 spectrometry analysis showed that labeled glucose were efficiently transformed into organic acids in the  
245 plasma and the liver (Fig. 5b, e; Supplementary Fig. 8b, c), consistent with previous observations made by  
246 the Rabinowitz group that carbohydrates were first transformed into organic acids and released into  
247 circulation before being utilized for energy production<sup>32,33</sup>. Besides supplying the TCA cycle (Fig. 5e),  
248 organic acids were fed into hepatic gluconeogenesis as indicated by the enrichment of  $^{13}\text{C}$ -labeled  
249 gluconeogenic intermediates and glucose isotopomers in liver over their plasma counterparts (Fig. 5b).  
250 Dietary glucose further contributed to the hepatic synthesis of the ribose group through the pentose  
251 phosphate pathways as evidenced by the m+5 and m+10 labeling of nucleotides (m+5, Fig. 5c upper panel).  
252 However, most amino acids, except alanine (Supplementary Fig. 8f), were not labeled by glucose-derived  
253  $^{13}\text{C}$ , suggesting a weak cataplerosis from the TCA cycle. Together, these data suggest dietary glucose  
254 utilization in the liver is facilitated by its initial transformation into organic acids in extra-hepatic tissues,  
255 and hepatocytes themselves do not catabolize glucose for energy production or non-essential amino acid  
256 synthesis.

257 We then examined amino acid metabolism in mice fed with uniformly labeled amino acid mixture ( $[\text{U-}^{13}\text{C}$ ,  
258  $^{15}\text{N}]\text{AA}$ ) in the presence of unlabeled glucose (Supplementary Fig. 8a-e). Overall, amino acid as a mixture  
259 were metabolized very differently *in vivo*. For example, glutamine, glutamate, and aspartate were  
260 effectively cleared by the intestine, and the labeled forms were almost absent from the plasma  
261 (Supplementary Fig. 8e, f). In contrast, the majority of essential amino acids were absorbed into the plasma  
262 efficiently, and lysine was uniquely enriched in the plasma (Supplementary Fig. 8e), possibly due to its  
263 superfluous composition in the mixture (Supplementary Fig. 8a). The carbon backbones of those cleared  
264 amino acids were transformed into  $^{13}\text{C}$ -labeled organic acids, including lactate, pyruvate, citrate, succinate,  
265 and orotate (Fig. 5b-c lower panel, e), which may serve as precursors for energy production,  
266 gluconeogenesis, and nucleotide biosynthesis (Fig. 5c lower panel). Therefore, the initial transformation of

267 dietary nutrients into organic acids is not a carbohydrate-specific phenomenon. However, labeled amino  
268 acid carbon did not enter the gluconeogenic pathways effectively (Fig. 5b lower panel), reaffirming the  
269 territorial dominance of glucose carbon in this domain. Additionally, the absence of labeled  $\alpha$ -ketoglutarate  
270 in the plasma suggests the carbon backbones of glutamine and glutamate might be utilized by the intestinal  
271 microbiota (Fig. 5e), and the body glutamine/glutamate pool is most likely synthesized from other organic  
272 acids.

273 The difference in amino acid catabolism may also be inferred from the relative abundance of [ $U$ - $^{13}C$ ,  $^{14}N$ ]  
274 AA over their respective [ $U$ - $^{13}C$ ,  $^{15}N$ ] isotopomers. As shown in Fig. 5g-j, the  $^{13}C^{14}N/^{13}C^{15}N$  ratio is closely  
275 correlated with the labeling efficiency of the TCA cycle metabolites generated from their respective amino  
276 acids (underlined). Aspartate is the only exception in that it has no detectable levels of  $^{13}C^{14}N$ -Asp (Fig. 5j  
277 right panel), because the donation of its amine group for adenine synthesis from IMP (Fig. 5c) is  
278 accompanied by the release of its carbon backbone as formate, preventing re-amination. Importantly, the  
279 labeling efficiency of acetyl-CoA were higher in the amino acid-traced samples than in the glucose-traced  
280 samples (Fig. 5d), despite glucose being three times higher in abundance than the whole amino acid mixture,  
281 and dietary non-essential amino acids were effectively cleared by the intestine.

282 Lastly, we examined how dietary glucose and amino acids labeled the hepatic fatty acid pool under above  
283 tracing conditions (Fig. 5a). As shown in Fig. 5k, the percentage of fatty acids with  $^{13}C$  incorporation varied  
284 significantly both among different fatty acid species and within each experimental group (Fig. 5j;  
285 Supplementary Fig. 8g), suggesting individual variations among hepatic DNL activity. However, the fatty  
286 acid isotopomer relative abundance distribution curve was remarkably similar within each group (Fig. 5k;  
287 Supplementary Fig. 8h). The abundance of glucose-labeled palmitate and stearate isotopomer species were  
288 relatively equivalent, whereas the amino acid labeled isotopomer distribution curves were strongly skewed  
289 toward low  $m+$  isotopomers (Fig. 5k), indicating higher carbon contribution from glucose than from amino  
290 acids. However, the complex, zig-zagging isotopomer distribution pattern between odd and even  $m+$   
291 isotopomers suggests a non-homogenous polymer synthesis process, and it prevents the exact determination

292 of the fractional contribution of glucose and amino acid derived carbon toward DNL based on mass  
293 isotopomer analysis<sup>30</sup>. Instead, we aggregated the percentage of <sup>13</sup>C among the labeled fatty acids as an  
294 approximation of fractional substrate contribution. As shown in Fig. 5l, dietary glucose contributed ~45%  
295 of carbon toward newly synthesized palmitate, while amino acids contributed ~30%. Given the amount of  
296 amino acids was only 1/3 of glucose in the drinking water, the lipogenic potential of dietary amino acids is  
297 ~2-fold greater than that of glucose. The fractional contribution of dietary glucose and amino acid carbon  
298 toward the synthesis of other fatty acids in the liver was similar to those of palmitate (Supplementary Fig.  
299 8i), and the overall contribution of glucose and amino acids toward hepatic DNL was around 45% vs. 55%  
300 when we take the endogenous amino acid pool into account (Fig. 5m).

301

### 302 **Stimulation of glycogen storage reduces glycerol-3P synthesis and hepatic TAG** 303 **accumulation**

304 The *ex vivo* and *in vivo* flux analyses suggest glucose may contribute to triglyceride synthesis through the  
305 synthesis of glycerol-3P and fatty acids. We reasoned that an increase in glycogen synthesis may serve as  
306 a sink to compete glucose and its organic acid derivatives away from triglyceride synthesis pathways in  
307 obesity.

308 An initial support for this hypothesis was from the observation that the obese mice exhibited prolonged  
309 hyperglycemia after food ingestion and a severed ability to synthesize hepatic glycogen but not triglycerides  
310 (Fig. 6a, b; Supplementary Fig. 9a-c). The opposing effect of obesity on the glycogen and triglyceride  
311 synthesis pathway was partially reflected in the induction of glycolytic gene expression in the obese mice  
312 liver but the impaired response of glycogen synthase to feeding-induced dephosphorylation and activation  
313 (Supplementary Fig. 9d, e). The induction of glucose-6-phosphate phosphatase in obesity may also  
314 contribute to the reduction in glycogen synthesis.

315 To formerly test this hypothesis, we examined the effect of adenovirus-mediated glycogen synthase (GYS2)  
316 overexpression on hepatic TAG accumulation in the obese mice (Supplementary Fig. 9f). Consistent with  
317 our hypothesis, GYS2 overexpression not only doubled hepatic glycogen content (Fig. 6c) but also halved  
318 hepatic triglyceride content (Fig. 6d, e), without any significant effect on body weight as well as liver and  
319 adipose tissue size (Supplementary Fig. 9g). A similar beneficial effect of GYS2 overexpression on  
320 reducing hepatic triglyceride content was observed in the high-fat diet (HFD)-induced obese mice liver  
321 (Supplementary Fig. 9h), and the ability of the HFD obese mice to restore normoglycemia after a bolus  
322 injection of glucose was improved significantly (Supplementary Fig. 9i).

323 We then conducted a chemical inhibitor screening to further examine the specific contribution of individual  
324 glucose metabolism pathways toward hepatic TAG accumulation in obesity. As shown in Supplementary  
325 Fig. 9j, inhibition of glycerol-3P synthesis by GPDi significantly lowered triglyceride levels in the primary  
326 hepatocytes, whereas blocking the PPP (G6PDi) and glycolysis (PKMi) had no significant effect. Both *ex*  
327 *vivo* and *in vivo* flux analysis suggest hepatic glycerol-3P synthesis is synthesized by GA3P to DHAP  
328 conversion (Supplementary Fig. 9k). Therefore, we used adenovirus-expressed shRNA to specifically  
329 knockdown triosephosphate isomerase (TPI expression) in the obese mice liver (Supplementary Fig. 9l).  
330 As a result, hepatic triglyceride content was reduced by more than 60% (Fig. 6f-h), and no adverse effect  
331 on body weight and white adipose tissue size was observed (Supplementary Fig. 9m).

332

### 333 **Suppressing glutaminolysis driven reductive carboxylation or augmenting glutamine** 334 **oxidation attenuates DNL**

335 The intestinal absorption of glutamate and glutamine prevented us from directly assessing their contribution  
336 toward hepatic lipogenesis. Therefore, we resorted to chemical or genetic means to examine the  
337 contribution of the endogenous glutamate and glutamine pool toward hepatic triglyceride accumulation.

338 First, chemical inhibition of glutamine uptake by L- $\gamma$ -glutamyl-p-nitroanilide (GPNA) had a similarly  
339 potent effect in reducing triglyceride accumulation in the primary hepatocytes as the inhibitor for fatty acid  
340 synthesis (ACCi, Fig. 7a). Then we performed broad suppression on glutaminolysis by liver-type  
341 glutaminase (GLS2) knockdown in the obese mice, and dramatically attenuated the accumulation of hepatic  
342 triglycerides (Supplementary Fig. 10a-c). Thus, these results confirmed that glutamine is a substantial  
343 source of the fatty acid synthesis in the liver.

344 Our flux analysis and modeling studies revealed that the transamination and reductive carboxylation  
345 pathway of glutamate metabolism was increased in the obese primary hepatocytes while the oxidative  
346 deamination pathway might be suppressed (Fig. 2c, e, g; Fig. 3e; Supplementary Fig. 4g). Therefore, we  
347 hypothesized the reductive carboxylation pathway, not the oxidative deamination pathway, as the primary  
348 route of glutamate DNL. Consistent with this hypothesis, a general inhibition of transamination by AOA  
349 (Fig. 7b), or specific inhibition of glutamate-pyruvate transaminase (GPT) (Supplementary Fig. 11a),  
350 sharply reduced triglyceride accumulation, whereas treatment of primary hepatocytes with an inhibitor of  
351 the oxidative deamination enzyme, glutamate dehydrogenase (GLUD1), elevated cellular triglyceride  
352 content (Fig. 6c). Specific suppression of reductive carboxylation by adenovirus mediated knockdown of  
353 cytosolic isocitrate dehydrogenase 1 (IDH1) also significantly reduced hepatic triglyceride in obese mice  
354 liver (Supplementary Fig. 10a-c). We further confirmed the downregulation of the oxidative deamination  
355 pathway in the obese mice liver on both GLUD1 protein and its enzymatic activity levels (Fig. 7d, e). We  
356 therefore used adenovirus to overexpress GLUD1 (Supplementary Fig. 11b, c) as an effort to restore the  
357 glutamate oxidative deamination pathway and examine its impact on glutamine metabolism *ex vivo* and  
358 hepatic triglyceride accumulation *in vivo*.

359 As shown in Figure 7f, GLUD1 overexpression doubled the rate of glutamine oxidation, and it  
360 competitively suppressed the glutamate-driven transamination activity indicated by the abundance of <sup>15</sup>N-  
361 labeled aspartate in obese primary hepatocytes (Fig. 7g). In addition, both the reductive carboxylation  
362 (backward) and pyruvate cycling were reduced significantly (Fig. 7h, Supplementary Fig. 11d, e). More



363 importantly, fatty acid synthesis from glutamine was suppressed by GLUD1 overexpression (Fig. 7i).  
364 Intriguingly, incorporation of glucose carbon into fatty acids was also reduced to some extent in GLUD1-  
365 overexpressing primary hepatocytes (Supplementary Fig. 11f, g), probably through substrate competition  
366 in TCA cycle entrance or indirect contribution of glucose toward DNL through glutamine synthesis.

367 Consistent with flux analyses *ex vivo*, the overexpression of GLUD1 resulted in significant reduction in  
368 hepatic triglyceride accumulation in both the *ob/ob* and HFD obese mice models (Fig. 7j, k; Supplementary  
369 Fig. 9h, i). Glucose tolerance of the HFD obese mice was improved accordingly (Supplementary Fig. 11j).  
370 The suppression of DNL and improvement of hepatic steatosis occurred despite the elevation of the vast  
371 majority of amino acids except for glutamine and aspartate (Fig. 7l, m), confirming a prominent  
372 contribution from the endogenous glutamine pool in supporting DNL and the development of hepatic  
373 steatosis *in vivo*.

374

## 375 Discussion

376 Historically, direct quantification of the carbon source for fatty acid synthesis has been difficult, and the  
377 estimates vary<sup>17–20,22,34–38</sup>. There are inherent challenges in the task, including heterogeneities within the  
378 different fatty acid pools, fatty acid turnover, and isotope dilution, combined with high abundance (1.1%)  
379 of background <sup>13</sup>C in the nature. As has been demonstrated in a recent infusion study with 15 different <sup>13</sup>C-  
380 labeled substrates from the Rabinowitz group, no labeling signals were detected in the circulating fatty  
381 acids<sup>23</sup>. There has been attempts to overcome this limitation by measuring <sup>13</sup>C-enrichment of tissue acetyl-  
382 CoA or malonyl-CoA pool as a surrogate for DNL<sup>20,29</sup>. Current LC-MS technology has been mature enough  
383 to measure acetyl-CoA and malonyl-CoA at low nanomole/mL levels<sup>39,40</sup>. However, due to the complexity  
384 of metabolic pathways and compartmentalization of acetyl-CoA and malonyl-CoA, a quantitative  
385 relationship between <sup>13</sup>C-enrichment acetyl-CoA or malonyl-CoA pool with DNL has to be established  
386 before meaningful interpretations can be made.

387 Nevertheless, the contribution of glucose and glutamine toward the TCA cycle is very similar in our primary  
388 hepatocyte studies presented herein as those reported by mouse infusion studies<sup>23</sup>, suggesting primary  
389 hepatocytes are an invaluable system for *in vivo* approximation and hypothesis generation. We were further  
390 able to confirm those findings *in vivo* through bulk feeding and genetic models. Through a combined  
391 approach, we were able to not only account for over 70% of all hepatic DNL carbon sources for the first  
392 time but also demonstrate deregulations in glycogen synthesis and reductive carboxylation pathways as the  
393 primary cause of hepatic steatosis in obesity.

394 Additionally, by comparing *ex vivo* and *in vivo* flux studies, we observed intestinal absorption as a major  
395 modifier of dietary metabolism. Under *ex vivo* conditions, glucose carbon primarily fills the glycolysis,  
396 pentose phosphate pathway, and glycerol-3-phosphate synthesis pathway, while TCA and its surrounding  
397 pathways are dominated by amino acids (Fig. 11, 3b). Only under nutrient imbalanced conditions, such a  
398 territorial barrier in metabolism is lost, and glucose and amino acid carbon backbone may enter each other's  
399 metabolic orbit (Supplementary Table 1). Such a casting and complementation phenomenon in  
400 carbohydrate and amino acid metabolism reduces futile cycle under nutrient rich conditions while enables  
401 metabolic flexibility under nutrient imbalanced/restricted conditions.

402 However, under *in vivo* conditions, the territorial metabolism of glucose and amino acids are overrun by  
403 extra-hepatic transformation of glucose into organic acids, which could be readily taken up by the liver to  
404 fuel the TCA cycle and enter the DNL pathway. Besides glucose, intestinally absorbed amino acids are also  
405 transformed into organic acids in circulation, which may facilitate extra-hepatic utilization of amino acids  
406 for energy production, lipogenesis, and nucleotide biosynthesis. Additionally, amino acids cleared by the  
407 intestine may feed the microbiota to further modulate host nutrient metabolism and lipogenesis. Further,  
408 nutrients may participate in metabolism not only as a substrate but also a transcriptional/allosteric regulator.  
409 At least in the case of fructose, hepatic fructolysis is necessary to drive lipogenic gene expression and the  
410 development of metabolic syndrome<sup>41,42</sup>, and fructose-to-organic acid transformation in the intestine reduce  
411 hepatic steatosis<sup>43</sup>, indicating the importance of nutrient both as a signal and a substrate in driving

412 lipogenesis. Therefore, further genetic and combinatory flux analyses *in vivo* and *ex vivo* are critically  
413 needed to untangle tissue crosstalk in nutrient metabolism and evaluate the role of nutrient balance in  
414 physiology and obesity.

415

## 416 **Methods**

### 417 **Mouse Husbandry and Experimentation**

418 All the animal husbandry and experimental procedures were in strict accordance with the guidelines  
419 approved by the Institutional Animal Care and Use Committee (IACUC) of Tsinghua University. Male  
420 leptin-deficient (*ob/ob*) mice and lean wild-type littermates of 8-12 week old were obtained from HFK  
421 Bioscience (Beijing, China). For the diet-induced obesity model, male C57BL/6J mice purchased from  
422 Charles River (Beijing, China) were placed on a 6-month high-fat diet (D12492: 60% kcal% fat; Research  
423 Diets) starting from 4 weeks after birth. All the mice were housed in a specific pathogen free (SPF) facility  
424 at Tsinghua Laboratory Animal Research Center under 12/12-hours light-dark cycle and controlled  
425 temperature ( $25 \pm 1^\circ\text{C}$ ) with free access to water and food.

### 426 **Primary Hepatocyte Isolation and Culture**

427 For primary hepatocyte isolation, lean and *ob/ob* mice from 8-12 weeks old were first anesthetized with 80  
428 mg kg<sup>-1</sup> sodium pentobarbital. The mouse liver was first perfused with 40mL of warm (37°C) HBSS  
429 solution (Corning, Cat#21-022-CVR) containing 1mM EGTA (Amresco, Cat#0732) and 5.5mM glucose  
430 at a speed of 11 mL min<sup>-1</sup>, and then digested with 50 (lean) or 75 (*ob/ob*) mL of 0.3mg/mL Collagenase  
431 Type IV (Sigma, Cat#C5138) solution prepared in HBSS supplemented with 5mM CaCl<sub>2</sub> (Solarbio,  
432 Cat#C8370) and 5.5mM glucose. Primary hepatocytes were dispersed and sedimented at 50g for 2 (lean)  
433 or 7 (*ob/ob*) minutes, washed twice with M199 (MacGene, Cat#CM10013), and re-suspended in the  
434 attachment medium (M199 with 0.2% BSA, 2% FBS (Excell, Cat#11H116), 1% penicillin/streptomycin).  
435 Live cell numbers were determined by Trypan Blue (Amresco, Cat#K940) exclusion. After cell counting

436 and normalization, primary hepatocytes were seeded onto 0.1% gelatin (Amresco, Cat#9704) coated culture  
437 plates, incubated at 37°C with 5% CO<sub>2</sub> for 4-8 hours, washed, and maintained in M199 with 0.1mg/mL  
438 Primocin (InvivoGen, Cat#ant-pm-2) until further experimentation. Primary hepatocytes from mice  
439 maintained on normal chow diet (NCD) and HFD (high-fed diet) were isolated and traced with the same  
440 procedures.

#### 441 ***Ex vivo* <sup>13</sup>C-Isotopomer Tracing**

442 Mouse primary hepatocytes were seeded in 100 or 60mM plates at a density of 3-3.5×10<sup>6</sup> or 1.6 ×10<sup>6</sup> cells  
443 per plate, respectively. After 6 hours, hepatocytes were washed with phosphate buffer solution (PBS) and  
444 pre-incubated in a base medium without glucose or amino acids for 45 minutes to deplete the intracellular  
445 pool of unlabeled macronutrients. The primary hepatocytes were then replaced in a fresh base medium  
446 supplemented with the isotopic tracers, 10mM [U-<sup>13</sup>C]glucose (CLM, Cat#CLM-1396-PK) or 2.5mM [U-  
447 <sup>13</sup>C,<sup>15</sup>N]glutamine (CLM, Cat# CNLM-1275-H-PK). At indicated time points, media were promptly  
448 drained and plates were snap-frozen in liquid nitrogen. To label newly synthesized fatty acids, primary  
449 hepatocytes were first pre-incubated in M199 supplemented with 100nM insulin (Sigma, Cat#10516) for  
450 lipogenesis activation, and incubated in the same media containing either 15mM (5mM <sup>12</sup>C+10mM <sup>13</sup>C)  
451 glucose plus 3.2mM <sup>12</sup>C glutamine (Gibco, Cat#25030-081), or 15mM <sup>12</sup>C Glucose plus 3.2mM (0.7mM  
452 <sup>12</sup>C,<sup>14</sup>N+ 2.5mM <sup>13</sup>C,<sup>15</sup>N) glutamine, or 15mM <sup>12</sup>C glucose plus 0.365 g/L [U-<sup>13</sup>C,<sup>15</sup>N]amino acids mixture  
453 (CLM, Cat#CNLM-452) for 6 hours. M199 contains 50mg/L of sodium acetate.

#### 454 ***In vivo* <sup>13</sup>C-Isotopomer Tracing**

455 To assess the contribution from dietary carbohydrates and amino acids toward *in vivo* energy metabolism  
456 and lipogenesis, mice were fed for 24 hours with glucose and amino acids dissolved in drinking water at a  
457 3:1 ratio (15% glucose + 5% amino acids mixture *w/w*) mimicking normal chow diet formulation (LabDiet  
458 5K52). The drinking water contained either [U-<sup>13</sup>C]glucose (CLM, Cat#CLM-1396) plus unlabeled <sup>12</sup>C<sup>14</sup>N  
459 amino acids (ULM-7891), or <sup>12</sup>C glucose plus [U-<sup>13</sup>C, <sup>15</sup>N]amino acids (CNLM-6696). Plasma and tissues  
460 were harvested with liquid nitrogen. For metabolites extraction, serum (80μl) or liver tissue (50mg) was

461 homogenized in 2mL pre-chilled (-80°C) 80% (v/v) methanol solvent. For triglyceride fatty acids extraction,  
462 liver tissue (50mg) was homogenized in 3mL pre-chilled (-20°C) 50% (v/v) methanol solution with 0.1M  
463 HCl. The samples were processed as the following extraction steps, and used for LC-MS analysis.

#### 464 **Metabolite Extraction and Metabolomics Analysis**

465 To extract metabolites from primary hepatocytes, 2 or 4mL of pre-chilled (-80°C) 80% (v/v) methanol  
466 solvent was added to each 60mm or 100mm plate respectively, and the extraction was placed at -80°C for  
467 20 min. Cells were then scraped down from the plate on dry ice and transferred to an Eppendorf tube. For  
468 tissue sample extraction, frozen liver tissues were weighed (~50mg) and homogenized in 20 volumes of  
469 the same methanol solvent using polytron homogenizer (32000rpm for 30 seconds). The lysates were  
470 cleared by centrifugation at 14000g (4°C) for 5 minutes. The supernatant was then transferred to a new  
471 tube, air-dried in a Speed-Vac and stored at -80°C until mass spectrometry analysis.

472 The dried extracts were re-dissolved and analyzed using a targeted and untargeted liquid chromatography  
473 mass spectrometry (LC-MS/MS). Glycolysis and TCA cycle metabolites were measured on a TSQ  
474 Quantiva Triple Quadrupole mass spectrometer (Thermo Fisher Scientific, CA) with positive/negative ion  
475 switching. For amino acids profiling, a Q Exactive orbitrap mass spectrometer (QE-MS, Thermo Fisher  
476 Scientific, CA) was applied. The integrated peak intensities obtained from LC-MS were used for further  
477 data analysis.

478 For metabolic flux analysis, isotope labeling was corrected for natural <sup>13</sup>C abundance. Between-group  
479 differences of metabolites abundances were assessed by Welch's two-sample t-test, with  $p < 0.05$   
480 considered as statistically significant. For untargeted metabolomics analysis, raw values of each sample  
481 were normalized by its median of total metabolites intensity. Any missing values were assumed to be below  
482 the detection limit and were imputed with half of minimum of the whole dataset. Then hierarchical  
483 clustering (HCL) and principal components analysis (PCA) were employed to determine the data quality  
484 and detect potential outliers. Metabolites with more than two-fold change in normalized values and less  
485 than 0.05 in p-values were selected as differentially regulated. The statistical analysis and heat map

486 visualization were performed using R scripts (<http://cran.r-project.org/>) executed in RStudio (v. 0.99.896)  
487 for Windows.

#### 488 **Total Fatty Acids Extraction and Flux Analysis**

489 For total lipid extraction, 50% (v/v) methanol solution with 0.1M HCl was prepared and pre-chilled at -  
490 20°C. The primary hepatocytes in 100mM dishes were scraped down using the methanol solution and  
491 transferred into 10mL glass tubes. An aliquot of 1.5mL chloroform was added into each tube and vigorously  
492 mixed with vortex for 1 minutes. The samples were centrifuge at 3000 rpm for 15 minutes to achieve phase  
493 separation, and 1mL of the bottom layer was carefully transferred to a new glass tube, and evaporated by a  
494 stream of nitrogen. Fatty acids from total lipids were released by saponification (refluxing with 3mL 0.3M  
495 KOH in 90% methanol at 80°C for 1 hour and remaining ~300µL solvent). The samples were acidized with  
496 300µL formic acid (Fisher Scientific, Cat#A117-50), and then extracted with 3mL N-hexane. After a brief  
497 vortex, the mixture was allowed to settle naturally, and the top layer was transferred to a new glass tube.  
498 The lower layer were reextracted with another 1mL N-hexane, combined and air-dried under a constant  
499 stream of nitrogen. The dried samples were directly sent for LC-MS analysis.

#### 500 **Measurements of Triglycerides and Glycerol**

501 Total lipids from liver tissues (~100mg) were extracted with chloroform/methanol (2:1, v/v) according to  
502 the Folch method<sup>44</sup> and air-dried in a Speed-Vac. The samples were re-solubilized in 5% NP-40 with two  
503 cycles of 95°C, 5 minutes. Total lipids from primary hepatocytes (~0.2 million) were directly extracted  
504 with 5% NP-40 (MP, Cat#0219859680). Triglyceride levels were measured by triglyceride assay kit  
505 (Nanjing Jiancheng Bioengineering Institute, Cat#A110-2-1). Medium or intracellular glycerol levels were  
506 measured by glycerol assay kit (Applygen, Cat#E1002).

#### 507 **Reverse Transcribed Quantitative Polymerase Chain Reaction (RT-qPCR)**

508 Total RNA was extracted from liver tissues with TRIzol reagent (Life Technologies, Cat#15596018)  
509 according to manufacturer's recommendations. An aliquot of 0.5 µg RNA were reverse transcribed to

510 cDNA by FastKing RT Kit (KR116-02, Tiangen). cDNA samples were used as templates to perform real-  
511 time quantitative PCR with the power SYBR green mix (Abm, Cat#MasterMix-LR) on an Applied  
512 Biosystems QuantStudio (TM) 7 Flex System (Applied Biosystems). Duplicate runs of each sample were  
513 normalized to *36b4* to determine the relative transcript abundance of target genes. RT-qPCR primer  
514 sequences as following (F, forward; R: reverse):

515 *36b4*: F: 5'-CTTCATTGTGGGAGCAGACA-3', R: 5'-TCTCCAGAGCTGGGTTGTTC-3';

516 *Tpi*: F: 5'-CCAGGAAGTTCTTCGTTGGGG-3', R: 5'-CAAAGTCGATGTAAGCGGTGG-3';

517 *Gpd1*: F: 5'-ATGGCTGGCAAGAAAGTCTG-3', R: 5'-CGTGCTGAGTGTTGATGATCT-3';

518 *Acss2*: F: 5'-CCAGGAAGTTCTTCGTTGGGG-3', R: 5'-CAAAGTCGATGTAAGCGGTGG-3'.

### 519 **Protein Extraction and Western Blot Analysis**

520 Total protein lysates were extracted from liver tissues or cells with ice-cold radioimmuno-precipitation  
521 assay (RIPA) lysis buffer (50mM Tris pH 7.5, 150mM NaCl, 0.1% SDS, 1% NP-40, 0.5% sodium  
522 deoxycholate) supplemented with protease and phosphatase inhibitor cocktails (Pierce, Cat#78441). The  
523 lysates were clarified by centrifugation at 13000 rpm for 15 minutes, and protein concentrations were  
524 quantified by BCA (Solarbio, Cat#PC0021). Equal amounts (50µg) of protein lysates were resolved by  
525 SDS-PAGE, blotted onto a nitrocellulose membrane (Pall, Cat#66485), blocked with 5% milk in TBST for  
526 1 hour at room temperature, then incubated overnight with primary antibodies at 4°C. The blots were then  
527 washed and incubated with HRP-conjugated secondary antibody for 1 hour at room temperature, and  
528 visualized by ECL (Merck Milipore, Cat#WBKL50500) using a ChemiDoc MP imaging system (BioRad).  
529 For the detection of phosphoepitopes, BSA instead of milk was used for blocking and antibody preparation.  
530 Antibodies used in this study are listed below.

531 Rabbit anti-Glycogen Synthase (Cell Signaling Technology, Cat#3886S)

532 Rabbit anti-phospho-Glycogen Synthase (Ser641) (Cell Signaling Technology, Cat#3891)

533 GLUD1 (Santa Cruz, Cat# sc-160382)

534 Rabbit anti-ACL (CST, Cat#4332)

- 535 Rabbit anti-ACSL1 (CST, Cat#9189)  
536 Rabbit anti-FASN (CST, Cat#3180)  
537 Mouse anti-HIF1A (Abcam, Cat#ab16066)  
538 Rabbit anti-PDH (CST, Cat#3205)  
539 Rabbit anti-GCK (PTG, Cat#19666-1-AP)  
540 Rabbit anti-PCK1 (PTG, Cat#16754-1-AP)  
541 Mouse anti- $\beta$ -Actin (Abgent, Cat#AM1021B)  
542 Mouse anti-GAPDH (Easybio, Cat#BE0023)

### 543 **Measurement of Mitochondria Respiration and Glycolysis**

544 Mitochondria respiration and glycolysis were measured with the Seahorse XF96<sup>e</sup> extracellular flux analysis  
545 system (Agilent). Fresh primary hepatocytes were plated onto gelatin-coated, XF 96-well microplates at a  
546 density of  $4 \times 10^3$ /well. The medium was replaced after 4-8 hours with XF assay medium (Seahorse  
547 Biosciences 103334-100, supplemented with 10mM glucose, 2mM pyruvate, 4mM glutamine) or minimal  
548 medium containing same concentration of salt ions. The oxygen consumption rate (OCR) and extracellular  
549 acidification rate (ECAR) were measured by XF<sup>e</sup>96 Extracellular Flux Analyzer (Seahorse Biosciences)  
550 according to manufacturer's recommendations. Reagents were used at the following final concentrations:  
551 glucose/fructose (10mM), pyruvate (2mM), glutamine (4mM), oligomycin (4 $\mu$ M), FCCP (0.5 $\mu$ M),  
552 rotenone (2 $\mu$ M), antimycin A (2 $\mu$ M). For the mitochondria fuel test, inhibitors were used at the following  
553 concentrations: DMSO (0.1%), etomoxir (40 $\mu$ M, MCE, Cat#HY-50202), UK5099 (40 $\mu$ M, MCE, Cat#HY-  
554 15475), aminooxyacetate (AOA, 40mM, Macklin, Cat#0805087). Measured values were normalized to  
555 total protein amount quantified by BCA or cell number of the primary hepatocytes plated on parallel plates.

### 556 **Adenovirus-mediated Knockdown and Overexpression**

557 For knockdown experiments, adenoviruses expressing *LacZ* and *Tpi* shRNA were cloned into the  
558 Adenoviral Gateway Expression System (Invitrogen, CA). In brief, the shRNA oligos targeting *LacZ* and  
559 mouse *Tpi* obtained from MISSION shRNA Library (Sigma) were first cloned into their respective entry



560 vectors (pENTR-U6), and then recloned into their corresponding destination vectors (pAd/BLOCK-iT™-  
561 DEST) through LR recombination. For overexpression experiments, PCR amplification of *Gfp* (control)  
562 and *Glud1* open reading frame from mouse cDNA were first cloned into pENTR1A and then recombined  
563 into pAd/CMV/V5-DEST Gateway®.

564 Primer sequence used for cloning shRNA targeting *Tpi*:

565 top-strand (5'-3'):

566 CACCGTTCGAGCAAACCAAGGTCATCTCCGAAGAGATGACCTTGGTTTGCTCGAAC,

567 bottom-strand (5'-3'):

568 AAAAGTTCGAGCAAACCAAGGTCATCTCTTCGGAGATGACCTTGGTTTGCTCGAAC.

569 Primer sequence used for cloning shRNA targeting *Acss2*:

570 top-strand (5'-3'): CACCGCGAATGCCTCTACTGCTTTCTCGAGAAAGCAGTAGAGGCATTCGC,

571 bottom-strand (5'-3'):

572 AAAAGCGAATGCCTCTACTGCTTTCTCGAGAAAGCAGTAGAGGCATTCGC.

573 For virus packaging and expression, plasmids were first digested and then transfected into HEK293A cells.  
574 After three rounds of amplifications, virus-producing HEK293A cells were harvested and lysed, and the  
575 released virus particles were purified by 55% cesium chloride and desalted through a PD10 column (GE  
576 Healthcare Life Sciences, Cat#17085101). Adenovirus particles were tail vein injected at doses of 0.1 OD  
577 for the lean, wild-type mice, or 0.12-0.15 OD per *ob/ob* mice. Mice were sacrificed 7-10 days after virus  
578 administration following a 6-hour food withdrawal, and the collected tissues were either immediately fixed  
579 in a 4% (*v/v*) paraformaldehyde (PFA) or snap-frozen in liquid nitrogen and stored in -80°C. For *ex vivo*  
580 overexpression studies, primary hepatocytes were infected with adenoviruses at a concentration of 6.25×  
581 10<sup>-4</sup> OD/1×10<sup>5</sup> cells for 24 hours.

## 582 **Histology Analysis**

583 For hematoxylin and eosin (H&E) staining, liver specimens were promptly fixed in 4% PFA after  
584 harvesting, dehydrated, and paraffin-embedded. The embedded tissues were then sectioned into 5- $\mu$ m-thick  
585 sections and stained with hematoxylin/eosin according to the standard protocols.

### 586 **Glucose and Insulin Tolerance Tests**

587 On day 7 and 9 after adenovirus injection, glucose tolerance tests (GTT) were performed in overnight-  
588 fasted HFD mice by intraperitoneal glucose injection (2 g kg<sup>-1</sup> body weight), and insulin tolerance tests  
589 (ITT) were performed by intraperitoneal insulin injection (1.5 IU kg<sup>-1</sup> for HFD mice) after a 6 hours food  
590 withdrawal. Tail plasma glucose concentrations were measured before and after the injection at the  
591 indicated time points.

### 592 **Cell Treatment and Lipid Droplet Staining**

593 Primary hepatocytes were incubated with different substrates or inhibitors for 16-24 hours at following  
594 concentrations: 10mM glucose (Amresco, Cat#0188-500G); 4mM glutamine (Gibco, Cat#25030-081);  
595 inhibitors targeting ACC (10nM MK-4074, MCE, Cat#HY-107709), GPD (10 $\mu$ M ginkgolic acid 15:1, Push  
596 Bio-technology, Cat#PB0667-0005), G6PD (1M 6-aminonicotinamide, Sigma, Cat#329-89-5), PKM  
597 (20 $\mu$ M Compound 3K, MCE, Cat#HY-103617), SLC1A5 (2.5mM L- $\gamma$ -glutamyl-p-nitroanilide, GPNA,  
598 Aladdin, Cat#S161136), GLUD1 (40 $\mu$ M R162, MCE, Cat#HY-103096). Then the cells were washed with  
599 PBS and fixed with 4% PFA for 15min. The lipid droplets were then stained with 0.38 $\mu$ M BODIPY 493/503  
600 fluorescent dye (Thermo Fisher Scientific, Cat#D3922) at 37°C for 5min and imaged. For flow cytometry-  
601 based quantification of lipid droplets, cells were counter-stained with DAPI (Solarbio, Cat#C0060) before  
602 being released from culture dish by trypsinization (Macgene, Cat#CC017). A total of 10,000 events were  
603 analyzed per sample. Average BODIPY signals of live cells were used for subsequent analyses.

### 604 **Glycogen Measurement**

605 Primary hepatocytes glycogen contents were measured by glycogen assay kit (Bioassay, Cat#E2GN-100).  
606 Alternatively, samples were mixed with aqueous alkali, and incubated at 100°C for 15 minutes to solubilize

607 glycogen and quantified following the manufacture's recommendations (Nanjing Jiancheng  
608 Bioengineering Institute, Cat#A043-1-1).

### 609 **Glutamate Dehydrogenase Activity Assay**

610 Liver tissues (~100mg) were homogenized in PBS, and the glutamate dehydrogenase (GLUD1) activity  
611 was directly measured by  $\alpha$ -ketoglutarate-dependent  $\text{NAD}^+$  formation in the presence of  $\text{NH}_4^+$  and NADH  
612 according to manufacturer's recommendation (Solarbio, Cat#BC1460).

### 613 **Glutamine and Glutamic acid Determination Assay**

614 Glutamine and glutamic acid of liver tissues (~50mg) or primary hepatocytes ( $1.6 \times 10^6$  cells) were extracted  
615 by pre-chilled ( $-80^\circ\text{C}$ ) 80% (v/v) methanol solvent following the metabolite extraction method. Samples  
616 were air-dried and re-dissolved in acetonitrile. The concentration of glutamine in the samples was then  
617 determined by LC-MS. The concentration of glutamic acid in the sample was determined chemically  
618 according to manufacturer's recommendations (Nanjing Jiancheng Bioengineering Institute, Cat#A074-1-  
619 1), and the relative concentrations were confirmed by LC-MS.

### 620 **Metabolic Flux Analysis**

621 Mass isotopomer distributions of the detected intracellular metabolites, citrate,  $\alpha$ -ketoglutarate, malate (as  
622 a combined node of succinate/succinyl-CoA/fumarate/malate), lactate and glutamic acid were used for the  
623 fluxes estimation. A simplified TCA cycle network based on a framework from reductive carboxylation  
624 research<sup>45</sup> was applied for calculation, and the flux analysis was performed by OpenMebius<sup>25</sup>. Isotopically  
625 nonstationary  $^{13}\text{C}$ -MFA (INST-MFA)<sup>46</sup> method was employed for glucose tracing results with multiple  
626 time points (5, 30, 120 minutes), and conventional  $^{13}\text{C}$ -MFA<sup>47</sup> were used for analyzing glutamine tracing  
627 results, for its rapid plateau at 10 minutes. The initial metabolite pools in the network were set as the  
628 intraheptocellular concentrations collected by HepatoDyn<sup>48</sup>.

### 629 **Mass Isotopomer Enrichment-based Estimate of DNL**

630  $D$  represents the fractional contribution of  $^{13}\text{C}$  labeled substrate carbon to lipogenic acetyl-CoA (AcCoA),  
631 and  $S$  represents the fraction of newly synthesized fatty acid among the total pool for any given fatty acid  
632 species (e.g., palmitate). Mass isotopomer enrichment (MIE) and mole percent enrichment (MPE)  
633 represents the percentile enrichment of palmitate isotopomers and  $^{13}\text{C}$  atoms, respectively, for the same  
634 fatty acid.

635 In the case of palmitate, it has eight potential  $^{13}\text{C}$ -containing isotopomers (MIE<sub>1-8</sub>): M+2, M+4, M+6, M+8,  
636 M+10, M+12, M+14, M+16. All odd number isotopomers are excluded due to their lower abundance. If  
637 we use MIE <sub>$i$</sub>  to denote the percentile abundance of the palmitate isotopomer that has  $i$   $^{13}\text{C}_2$  units, then:

$$638 \text{MIE} = \sum_1^8 (\text{MIE}_i)$$

$$639 \text{MPE} = \sum_1^8 \frac{\text{MIE}_i \cdot i}{8}$$

640 The solution for  $D$  and  $S$  for palmitate can be found by solving the following two equations in Matlab:

$$641 S \cdot (1 - (1 - D)^8) = \text{MIE} \quad (1)$$

$$642 S \cdot D = \text{MPE} \quad (2)$$

643  $D$  and  $S$  can also be estimated by the Fatty Acid Source Analysis (FASA) program in Matlab<sup>31</sup>, which is  
644 based on the principle of mass isotopomer distribution (MID).

## 645 **Statistical Analysis**

646 Data are presented as mean  $\pm$  SEM. Student's unpaired t-test was performed to determine statistical  
647 differences between two groups. Multiple groups or time-series comparison for substrate flux analysis and  
648 GTT were assessed by two-way ANOVA.  $P$ -values of less than 0.05 were considered as significant, and  $p$ -  
649 values ranging from 0.05 to 0.1 were labeled on the graphs of metabolic flux.  $N$  denotes the number of  
650 biological replicates in each experiment, and it is provided in the corresponding figure legends. Immunoblot  
651 quantification was completed by AlphaView (FluroChem FC3). Schematic diagrams and cartoons were  
652 drawn in ChemDraw 17.0 or Adobe Illustrator CS6. All other graphs were drawn in Graphpad Prism 8.0.2  
653 software.

654

655 **Acknowledgements**

656 We thank X. Liu, X. Wang, Y. Jiao, and L. Xu from the Metabolomics Facility at Technology Center for  
657 Protein Sciences and W. Wang from the Pharmaceutical Technology Center at Tsinghua University for  
658 technical help about LC-MS and metabolomics data analysis. We thank the Core Facility of Center for  
659 Biomedical Analysis, Tsinghua University for technical support about Seahorse analysis. We thank Peng  
660 Li, Guangshuo Ou, Yiguo Wang, Xiaowei Chen, Ligong Chen, and Peng Jiang for helpful discussions with  
661 this project. We thank H. Huang, N. Li and all present and former members of the Fu lab for their  
662 technical assistance and discussions. This work is supported by the National Science and Technology Major  
663 Project (2016YFA0502002 and 2017YFA0504603), and National Natural Science Foundation of China  
664 (NSFC 81471072 and 31671229). Additional support for the Fu lab comes from Tsinghua-Peking Center  
665 for Life Sciences, National 1000 Junior Scholar Program, DOE Key Laboratory of Bioinformatics, and the  
666 Center for Synthetic and Systems Biology at Tsinghua University.

667 **Author Contributions**

668 Conceptualization: Y.L and S.F; Investigation: Y.L, L.L, H.L, X.B, F.S; Writing: Y.L and S.F; Supervision:  
669 S.F.

670 **Competing Interests Statement**

671 The authors declare no competing financial interests.

672

## 673 **References**

- 674 1. Brunt, E. M., Janney, C. G., Di Bisceglie, A. M., Neuschwander-Tetri, B. A. & Bacon, B. R.  
675 Nonalcoholic steatohepatitis: A proposal for grading and staging the histological lesions. *Am. J.*  
676 *Gastroenterol.* **94**, 2467–2474 (1999).
- 677 2. Angulo, P. Medical progress: Nonalcoholic fatty liver disease. *New England Journal of Medicine*  
678 **346**, 1221–1231 (2002).
- 679 3. Lallukka, S. & Yki-Järvinen, H. Non-alcoholic fatty liver disease and risk of type 2 diabetes. *Best*  
680 *Practice and Research: Clinical Endocrinology and Metabolism* **30**, 385–395 (2016).
- 681 4. Targher, G., Day, C. P. & Bonora, E. Risk of cardiovascular disease in patients with nonalcoholic  
682 fatty liver disease. *New England Journal of Medicine* **363**, 1341–1350 (2010).
- 683 5. Michelotti, G. A., Machado, M. V. & Diehl, A. M. NAFLD, NASH and liver cancer. *Nature*  
684 *Reviews Gastroenterology and Hepatology* **10**, 656–665 (2013).
- 685 6. Kim, D. *et al.* Trends in hospitalizations for chronic liver disease-related liver failure in the United  
686 States, 2005-2014. *Liver Int.* **39**, 1661–1671 (2019).
- 687 7. Younossi, Z. *et al.* Global burden of NAFLD and NASH: Trends, predictions, risk factors and  
688 prevention. *Nature Reviews Gastroenterology and Hepatology* **15**, 11–20 (2018).
- 689 8. Takahashi, Y., Sugimoto, K., Inui, H. & Fukusato, T. Current pharmacological therapies for  
690 nonalcoholic fatty liver disease/nonalcoholic steatohepatitis. *World Journal of Gastroenterology*  
691 **21**, 3777–3785 (2015).
- 692 9. Donnelly, K. L. *et al.* Sources of fatty acids stored in liver and secreted via lipoproteins in patients  
693 with nonalcoholic fatty liver disease. *J. Clin. Invest.* **115**, 1343–1351 (2005).
- 694 10. Jacome-Sosa, M. M. & Parks, E. J. Fatty acid sources and their fluxes as they contribute to plasma  
695 triglyceride concentrations and fatty liver in humans. *Current Opinion in Lipidology* **25**, 213–220

- 696 (2014).
- 697 11. Lewis, G. F., Carpentier, A., Adeli, K. & Giacca, A. Disordered fat storage and mobilization in the  
698 pathogenesis of insulin resistance and type 2 diabetes. *Endocrine Reviews* **23**, 201–229 (2002).
- 699 12. Chaves, V. E. *et al.* Increased glyceride-glycerol synthesis in liver and brown adipose tissue of rat:  
700 In-vivo contribution of glycolysis and glyceroneogenesis. *Lipids* **47**, 773–780 (2012).
- 701 13. Nye, C. K., Hanson, R. W. & Kalhan, S. C. Glyceroneogenesis is the dominant pathway for  
702 triglyceride glycerol synthesis in vivo in the rat. *J. Biol. Chem.* **283**, 27565–27574 (2008).
- 703 14. Hanson, R. W. & Reshef, L. Glyceroneogenesis revisited. in *Biochimie* **85**, 1199–1205 (Elsevier,  
704 2003).
- 705 15. Lambert, J. E., Ramos-Roman, M. A., Browning, J. D. & Parks, E. J. Increased de novo  
706 lipogenesis is a distinct characteristic of individuals with nonalcoholic fatty liver disease.  
707 *Gastroenterology* **146**, 726–735 (2014).
- 708 16. Jones, J. G. Identifying Sources of Hepatic Lipogenic Acetyl-CoA Using Stable Isotope Tracers  
709 and NMR. *Adv. Radiol.* **2014**, 1–9 (2014).
- 710 17. Clark, D. G., Rognstad, R. & Katz, J. Lipogenesis in rat hepatocytes. *J. Biol. Chem.* **249**, 2028–  
711 2036 (1974).
- 712 18. Botion, L. M. *et al.* Glucose contribution to in vivo synthesis of glyceride-glycerol and fatty acids  
713 in rats adapted to a high-protein, carbohydrate-free diet. *Metabolism.* **47**, 1217–1221 (1998).
- 714 19. Carvalho, F., Duarte, J., Simoes, A. R., Cruz, P. F. & Jones, J. G. Noninvasive measurement of  
715 murine hepatic acetyl-CoA C 13 -enrichment following overnight feeding with C 13 -enriched  
716 fructose and glucose. *Biomed Res. Int.* **2013**, (2013).
- 717 20. Kaempfer, S. *et al.* Fraction of hepatic cytosolic acetyl-CoA derived from glucose in vivo: relation  
718 to PDH phosphorylation state. *The American journal of physiology* **260**, E865-75 (1991).

- 719 21. Schwarz, J. M., Neese, R. A., Turner, S., Dare, D. & Hellerstein, M. K. Short-term alterations in  
720 carbohydrate energy intake in humans. Striking effects on hepatic glucose production, de novo  
721 lipogenesis, lipolysis, and whole-body fuel selection. *J. Clin. Invest.* **96**, 2735–2743 (1995).
- 722 22. Hellerstein, M. K., Schwarz, J. & Neese, R. A. Regulation of Hepatic De Novo Lipogenesis in  
723 Humans. *Annu. Rev. Nutr.* **16**, 523–557 (1996).
- 724 23. Hui, S. *et al.* Quantitative Fluxomics of Circulating Metabolites. *Cell Metab.* (2020).  
725 doi:10.1016/j.cmet.2020.07.013
- 726 24. Wang, H. *et al.* Myc and ChREBP transcription factors cooperatively regulate normal and  
727 neoplastic hepatocyte proliferation in mice. *J. Biol. Chem.* **293**, 14740–14757 (2018).
- 728 25. Kajihata, S., Furusawa, C., Matsuda, F. & Shimizu, H. OpenMebius: an open source software for  
729 isotopically nonstationary <sup>13</sup>C-based metabolic flux analysis. *Biomed Res. Int.* **2014**, 627014  
730 (2014).
- 731 26. Miller, R. A. *et al.* Targeting hepatic glutaminase activity to ameliorate hyperglycemia. *Nat. Med.*  
732 **24**, 518–524 (2018).
- 733 27. Buckley, B. M. & Williamson, D. H. Origins of blood acetate in the rat. *Biochem. J.* **166**, 539–545  
734 (1977).
- 735 28. Tredwell, G. D. & Keun, H. C. convISA: A simple, convoluted method for isotopomer spectral  
736 analysis of fatty acids and cholesterol. *Metab. Eng.* **32**, 125–132 (2015).
- 737 29. Hellerstein, M. K. *et al.* Measurement of de novo hepatic lipogenesis in humans using stable  
738 isotopes. *J. Clin. Invest.* **87**, (1991).
- 739 30. Kelleher, J. K. & Masterson, T. M. Model equations for condensation biosynthesis using stable  
740 isotopes and radioisotopes. *Am. J. Physiol.* **262**, E118-25 (1992).
- 741 31. Argus, J. P. *et al.* Development and Application of FASA, a Model for Quantifying Fatty Acid



- 742 Metabolism Using Stable Isotope Labeling. *Cell Rep.* **25**, 2919-2934.e8 (2018).
- 743 32. Zhao, S. *et al.* Dietary fructose feeds hepatic lipogenesis via microbiota-derived acetate. *Nature*  
744 **579**, 586–591 (2020).
- 745 33. Hui, S. *et al.* Glucose feeds the TCA cycle via circulating lactate. *Nature* **551**, 115–118 (2017).
- 746 34. Acheson, K. J., Flatt, J. P. & Jéquier, E. Glycogen synthesis versus lipogenesis after a 500 gram  
747 carbohydrate meal in man. *Metabolism.* **31**, 1234–40 (1982).
- 748 35. Björntorp, P. & Sjöström, L. Carbohydrate storage in man: speculations and some quantitative  
749 considerations. *Metabolism.* **27**, 1853–65 (1978).
- 750 36. Schwarz, J. M., Neese, R. A., Turner, S., Dare, D. & Hellerstein, M. K. Short-term alterations in  
751 carbohydrate energy intake in humans. Striking effects on hepatic glucose production, de novo  
752 lipogenesis, lipolysis, and whole-body fuel selection. *J. Clin. Invest.* **96**, 2735–2743 (1995).
- 753 37. Hellerstein, M. K., Wu, K., Kaempfer, S., Kletke, C. & Shackleton, C. H. L. Sampling the  
754 lipogenic hepatic acetyl-CoA pool in vivo in the rat: Comparison of xenobiotic probe to values  
755 predicted from isotopomeric distribution in circulating lipids and measurement of lipogenesis and  
756 acetyl-CoA dilution. *J. Biol. Chem.* **266**, 10912–10919 (1991).
- 757 38. D’Adamo, A. & Haft, D. An Alternate Pathway of Alpha-Ketoglutarate Catabolism in the  
758 Isolated, Perfused Rat Liver. I. Studies with DL-glutamate-2-and-5-<sup>14</sup>C. *J. Biol. Chem.* **240**, 613–  
759 7 (1965).
- 760 39. Fu, X. *et al.* Targeted Determination of Tissue Energy Status by LC-MS/MS. *Anal. Chem.* **91**,  
761 5881–5887 (2019).
- 762 40. Gilibili, R. R. *et al.* Development and validation of a highly sensitive LC-MS/MS method for  
763 simultaneous quantitation of acetyl-CoA and malonyl-CoA in animal tissues. *Biomed.*  
764 *Chromatogr.* **25**, 1352–1359 (2011).

- 765 41. Liu, L. *et al.* Triose Kinase Controls the Lipogenic Potential of Fructose and Dietary Tolerance.  
766 *Cell Metab.* **0**, (2020).
- 767 42. Andres-Hernando, A. *et al.* Deletion of Fructokinase in the Liver or in the Intestine Reveals  
768 Differential Effects on Sugar-Induced Metabolic Dysfunction. *Cell Metab.* **32**, 117-127.e3 (2020).
- 769 43. Jang, C. *et al.* The small intestine shields the liver from fructose-induced steatosis. *Nat. Metab.* **2**,  
770 586–593 (2020).
- 771 44. Folch, J., Lees, M. & Sloane Stanley, G. H. A simple method for the isolation and purification of  
772 total lipides from animal tissues. *J. Biol. Chem.* **226**, 497–509 (1957).
- 773 45. Yoo, H., Antoniewicz, M. R., Stephanopoulos, G. & Kelleher, J. K. Quantifying reductive  
774 carboxylation flux of glutamine to lipid in a brown adipocyte cell line. *J. Biol. Chem.* **283**, 20621–  
775 20627 (2008).
- 776 46. Cheah, Y. E. & Young, J. D. Isotopically nonstationary metabolic flux analysis (INST-MFA):  
777 putting theory into practice. *Current Opinion in Biotechnology* **54**, 80–87 (2018).
- 778 47. Lagziel, S., Lee, W. D. & Shlomi, T. Studying metabolic flux adaptations in cancer through  
779 integrated experimental-computational approaches. *BMC Biology* **17**, (2019).
- 780 48. Foguet, C. *et al.* HepatoDyn: A Dynamic Model of Hepatocyte Metabolism That Integrates 13C  
781 Isotopomer Data. *PLoS Comput. Biol.* **12**, (2016).

782

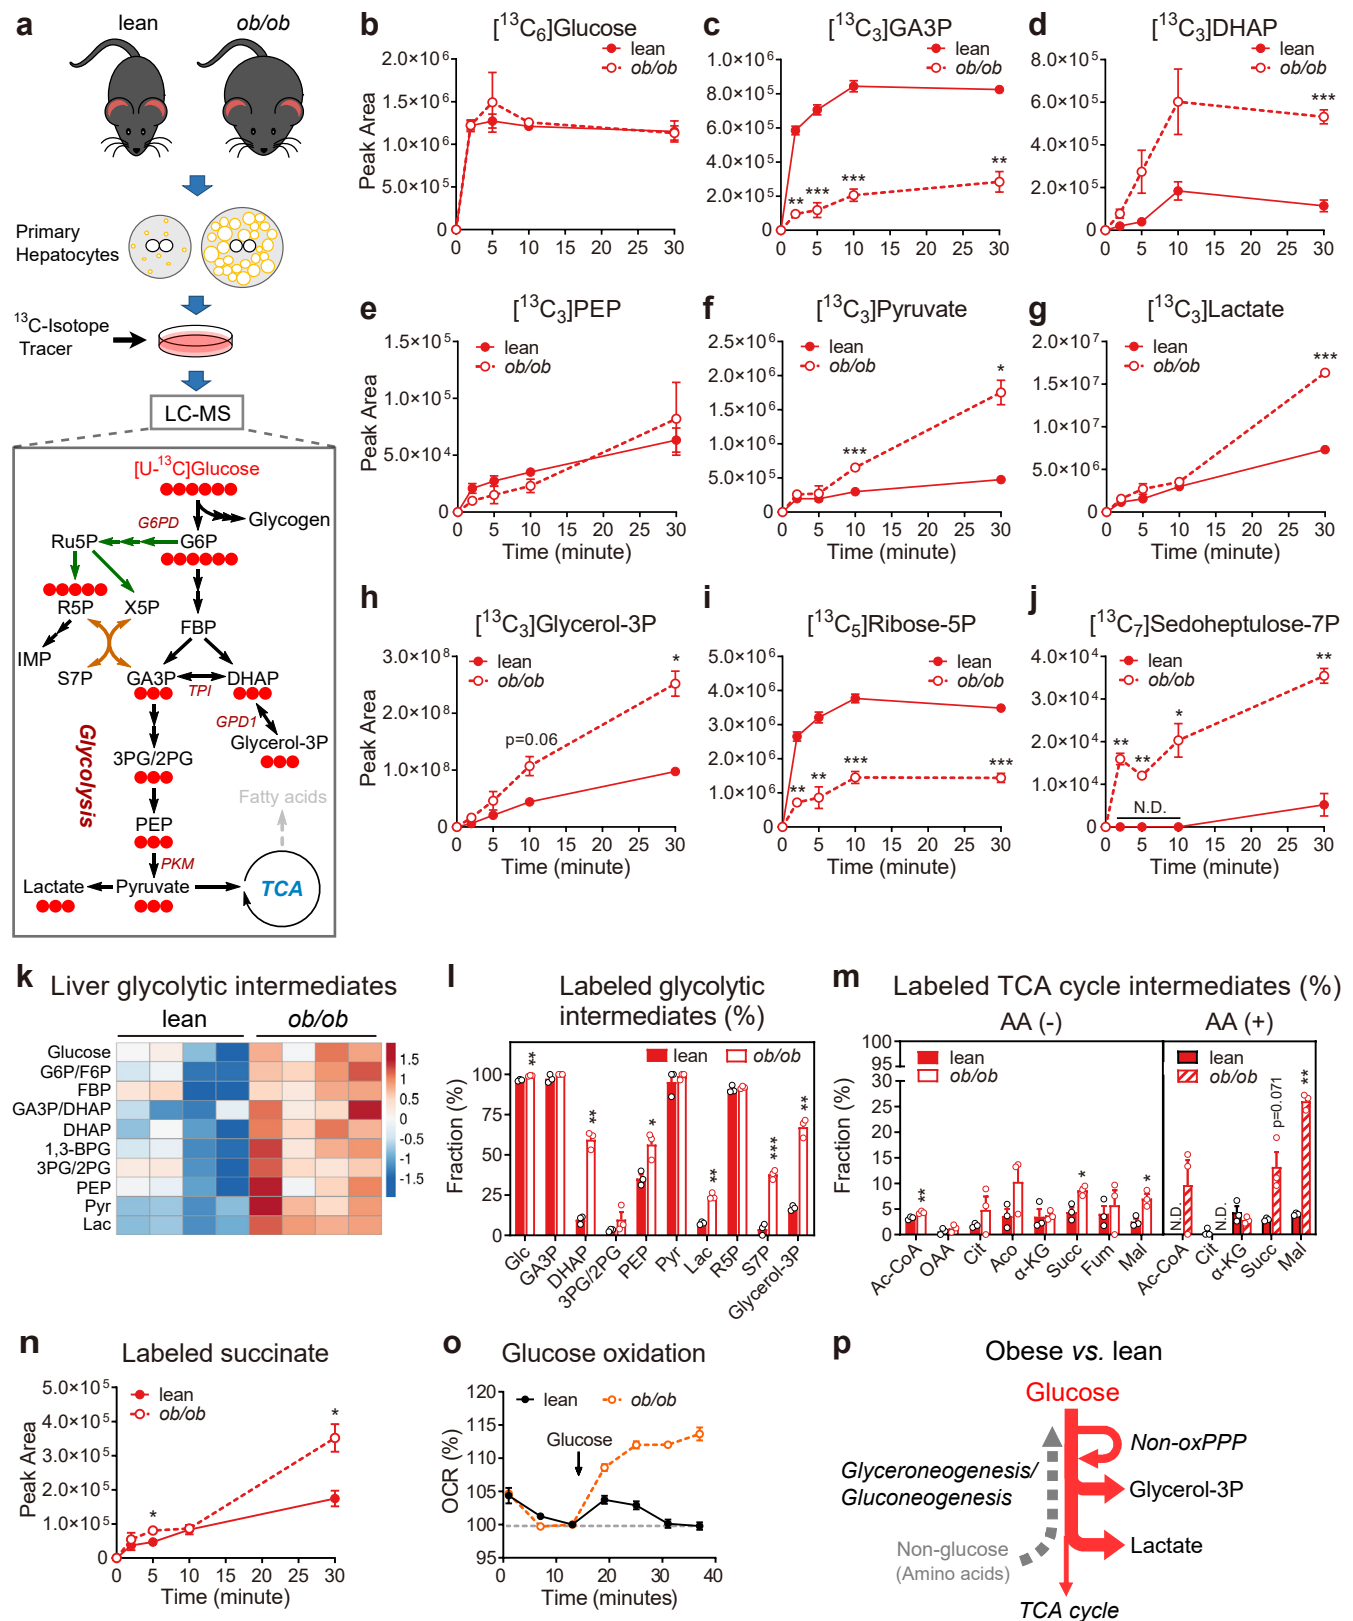

**Figure 1. Glucose flux in lean and *ob/ob* mice primary hepatocytes**

**a**, Schematic illustration of isotope tracing experiments with [U- $^{13}\text{C}$ ]Glc in mouse primary hepatocytes. Mouse primary hepatocytes were isolated from lean, wild-type and *ob/ob* mice, incubated with minimal medium or complete medium (glucose-free DMEM) for 45 minutes, then replaced with corresponding medium plus 10 mM [U- $^{13}\text{C}$ ]Glc tracer, and terminated either after 2, 5, 10, and 30 minutes (in minimal medium) or after 10 and 60 minutes (in DMEM). Glucose, Glc.

- b-j**, Accumulation kinetics of uniform,  $^{13}\text{C}$  isotope-labeled glucose and metabolites in lean and *ob/ob* mice primary hepatocytes during the course of  $[\text{U-}^{13}\text{C}]\text{Glc}$  tracing. Glyceraldehyde-3-phosphate, GA3P; dihydroxyacetone phosphate, DHAP; phosphoenolpyruvate, PEP.
- k**, Heatmap of glucose metabolite profile from the liver tissues of lean and *ob/ob* mice. Color scale denotes row scaling z-scores. Glucose 6-phosphate/fructose 6-phosphate, G6P/F6P; fructose 1,6-diphosphate, FBP; 1,3-bisphosphoglycerate, 1,3-BPG; 3-phosphoglycerate/2-phosphoglycerate, 3PG/2PG; pyruvate, Pyr; lactate, Lac.
- l**, Fractional abundance of  $^{13}\text{C}$ -labeled glycolysis intermediates compared to the total (labeled and unlabeled) of corresponding metabolites in lean and *ob/ob* primary hepatocytes at steady state (30 minutes).
- m**, Fractional abundance of all  $^{13}\text{C}$ -labeled TCA intermediates at steady state. Abbreviations: Acetyl-CoA, Ac-CoA; oxaloacetate, OAA; citrate, Cit; aconitate, Aco; isocitrate, IsoCit;  $\alpha$ -ketoglutarate,  $\alpha$ -KG; succinate, Succ; fumarate, Fum; malate, Mal.
- (N)** Accumulation kinetics of  $^{13}\text{C}$ -labeled succinate in lean and *ob/ob* mice primary hepatocytes.
- o**, Measurement of glucose-induced change in mitochondria oxygen consumption rate (OCR) in lean and *ob/ob* primary hepatocytes (n=8 and 6 respectively).
- p**, Illustration of obesity-induced hepatic metabolic remodeling inferred from  $[\text{U-}^{13}\text{C}]\text{Glc}$  tracing studies.
- Data are presented as means  $\pm$  SEM, n=3; text labeled 0.05 < p < 0.1, \*p < 0.05, \*\*p < 0.01, \*\*\*p < 0.001, two-tailed unpaired Student's *t*-test (*ob/ob* vs. lean). N.D., not detected. See also Supplementary Figure 1 and 2.

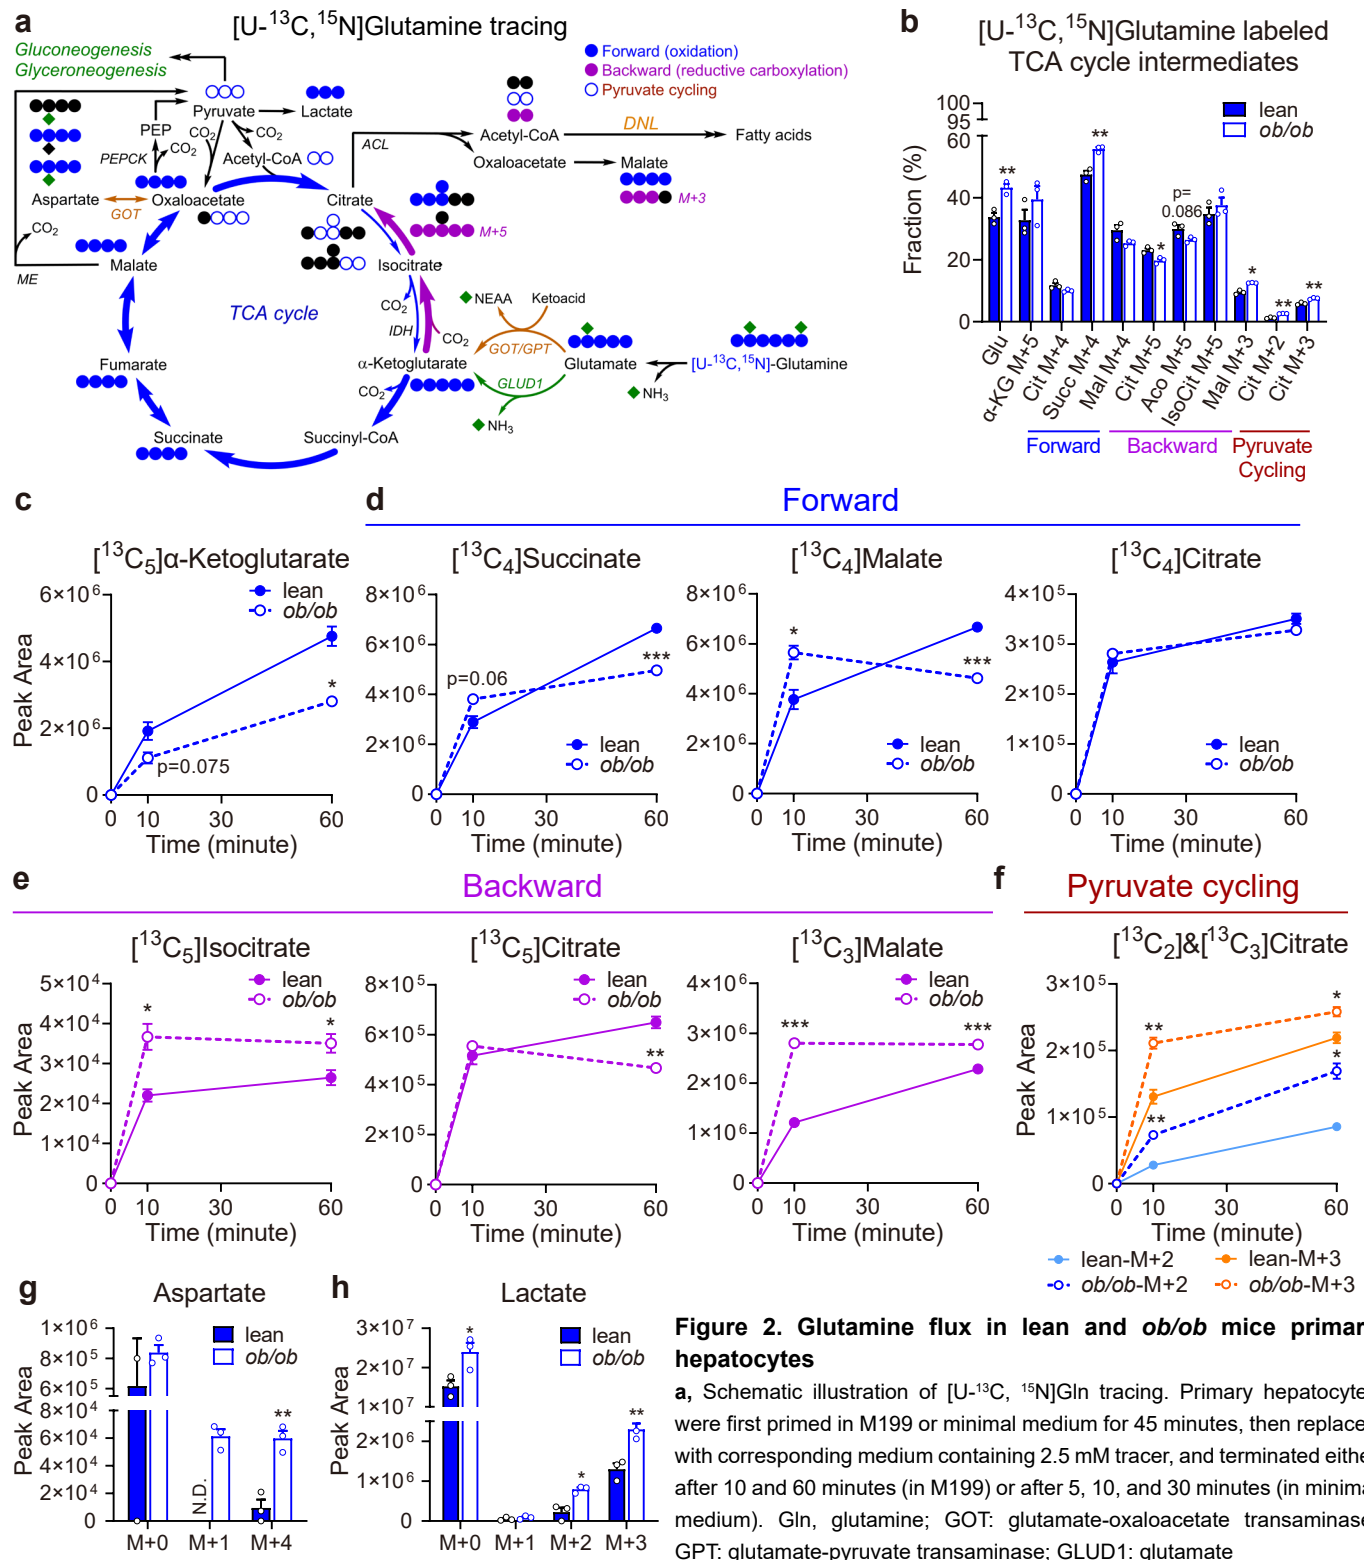

**Figure 2. Glutamine flux in lean and *ob/ob* mice primary hepatocytes**

**a**, Schematic illustration of [U-<sup>13</sup>C, <sup>15</sup>N]Gln tracing. Primary hepatocytes were first primed in M199 or minimal medium for 45 minutes, then replaced with corresponding medium containing 2.5 mM tracer, and terminated either after 10 and 60 minutes (in M199) or after 5, 10, and 30 minutes (in minimal medium). Gln, glutamine; GOT: glutamate-oxaloacetate transaminase; GPT: glutamate-pyruvate transaminase; GLUD1: glutamate

dehydrogenase 1; IDH: isocitrate dehydrogenase; ACL: ATP citrate lyase; ME: malic enzyme; PEPCK: phosphoenolpyruvate carboxykinase.

**b**, Fractional abundance of all <sup>13</sup>C isotope-labeled TCA cycle intermediates compared to the total (labeled and unlabeled) of corresponding metabolite in the primary hepatocytes 10 minutes after the addition of [U-<sup>13</sup>C, <sup>15</sup>N]Gln. Glutamate, Glu; oxaloacetate, OAA; citrate, Cit; aconitate, Aco; isocitrate, IsoCit; α-ketoglutarate, α-KG; succinate, Succ; malate, Mal.

**c-f**, Accumulation kinetics of <sup>13</sup>C isotope-labeled TCA cycle intermediates during the course of [U-<sup>13</sup>C, <sup>15</sup>N]Gln tracing.

**g**, Abundance of <sup>13</sup>C (M+4) or <sup>15</sup>N (M+1) isotopomers of aspartate accumulated in primary hepatocytes 10 minutes after [U-<sup>13</sup>C, <sup>15</sup>N]Gln addition.

**h**, Abundance of isotopomers of <sup>13</sup>C-labeled (M+1, 2, 3) and unlabeled (M+0) lactate accumulated at 10 minutes after [U-<sup>13</sup>C, <sup>15</sup>N]Gln addition.

Data are presented as means ± SEM, n=3; text labeled 0.05 < p < 0.1, \*p < 0.05, \*\*p < 0.01, \*\*\*p < 0.001, two-tailed unpaired Student's *t*-test (*ob/ob* vs. lean). N.D., not detected. See also Supplementary Figure 3..

**b**, Fractional abundance of all  $^{13}\text{C}$  isotope-labeled TCA cycle intermediates compared to the total (labeled and unlabeled) of corresponding metabolite in the primary hepatocytes 10 minutes after the addition of by  $[\text{U-}^{13}\text{C}, ^{15}\text{N}]\text{Gln}$ . Glutamate, Glu; oxaloacetate, OAA; citrate, Cit; aconitate, Aco; isocitrate, IsoCit;  $\alpha$ -ketoglutarate,  $\alpha$ -KG; succinate, Succ; malate, Mal.

**c-f**, Accumulation kinetics of  $^{13}\text{C}$  isotope-labeled TCA cycle intermediates during the course of  $[\text{U-}^{13}\text{C}, ^{15}\text{N}]\text{Gln}$  tracing.

**g**, Abundance of  $^{13}\text{C}$  (M+4) or  $^{15}\text{N}$  (M+1) isotopomers of aspartate accumulated in the primary hepatocytes 10 minutes after the addition of  $[\text{U-}^{13}\text{C}, ^{15}\text{N}]\text{Gln}$ .

**h**, Abundance of all isotopomers of  $^{13}\text{C}$ -labeled (M+1, 2, 3) and unlabeled (M+0) lactate accumulated in the primary hepatocytes 10 minutes after the addition of  $[\text{U-}^{13}\text{C}, ^{15}\text{N}]\text{Gln}$ .

**i**, Illustration of obesity-induced hepatic metabolic remodeling inferred from  $[\text{U-}^{13}\text{C}, ^{15}\text{N}]\text{Gln}$  tracing studies. Line thickness represents the relative flux rate of different pathways.

Data are presented as means  $\pm$  SEM, n=3; text labeled 0.05 < p < 0.1, \*p < 0.05, \*\*p < 0.01, \*\*\*p < 0.001, two-tailed unpaired Student's *t*-test (*ob/ob* vs. lean). N.D., not detected. See also Supplementary Figure 3..

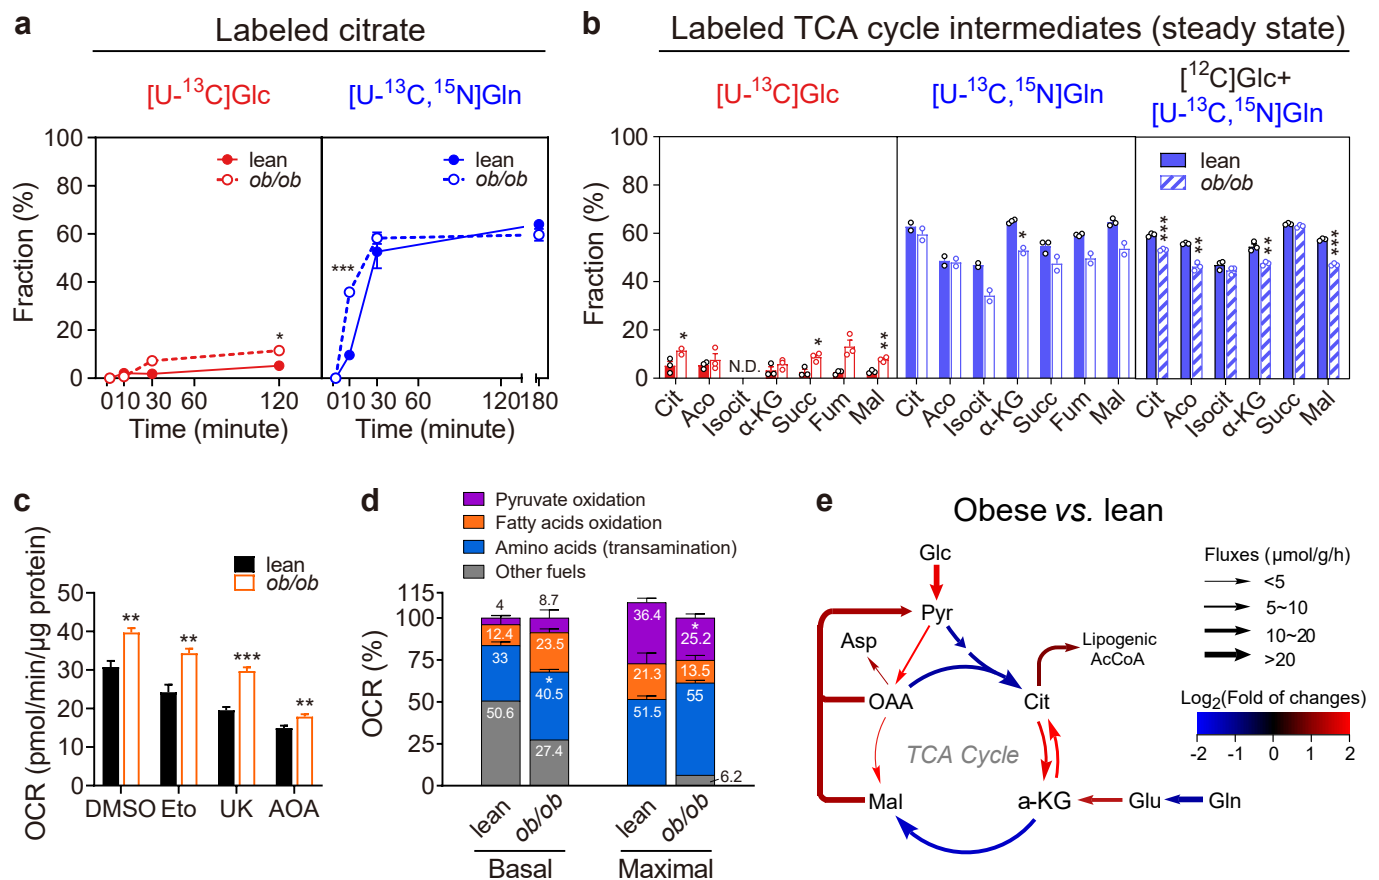

**Figure 3. Substrate level contribution of glucose and glutamine toward TCA cycle**

**a**, Kinetics of  $^{13}\text{C}$  isotope-labeled citrate accumulation in lean and obese primary hepatocytes traced with either 10 mM  $[\text{U-}^{13}\text{C}]\text{Glc}$  or 2.5 mM  $[\text{U-}^{13}\text{C}, ^{15}\text{N}]\text{Gln}$ .

**b**, Fractional abundance of all  $^{13}\text{C}$  isotope-labeled TCA intermediates compared to the total (labeled and unlabeled) of corresponding metabolites at steady state. Lean and *ob/ob* primary hepatocytes were traced with either 10 mM  $[\text{U-}^{13}\text{C}]\text{Glc}$  or 2.5 mM  $[\text{U-}^{13}\text{C}, ^{15}\text{N}]\text{Gln}$  in minimal medium, or 2.5 mM  $[\text{U-}^{13}\text{C}, ^{15}\text{N}]\text{Gln}$  in M199 ( $[\text{U-}^{13}\text{C}]\text{Glc} + [\text{U-}^{13}\text{C}, ^{15}\text{N}]\text{Gln}$ ).

**c**, Maximal mitochondrial oxygen consumption rate (OCR) of lean and *ob/ob* primary hepatocytes treated with DMSO (0.1%), etomoxir (Eto, 40  $\mu\text{M}$ ), UK5099 (UK, 40  $\mu\text{M}$ ), or aminooxyacetate (AOA, 40 mM).

**d**, Substrate-specific contribution toward mitochondria respiration calculated from (c).

**e**, Graphical summary of TCA cycle fluxes estimated by metabolic flux analysis of the data in Figure 1-3. Flux rate are expressed as  $\mu\text{mol/g}$  cells per hour. Line colors represent the flux changes between lean and obese mice primary hepatocytes. Abbreviations: glucose, Glc; pyruvate, Pyr; glutamine, Gln; glutamate, Glu; oxaloacetate, OAA; citrate, Cit; acetyl-CoA, Ac-CoA;  $\alpha$ -ketoglutarate,  $\alpha$ -KG; malate, Mal; aspartate, Asp. See details in Supplementary Figure 4g and Table 1.

Data are presented as means  $\pm$  SEM, outliers beyond  $1.5 \times \text{SD}$  are removed; text labeled  $0.05 < p < 0.1$ , \* $p < 0.05$ , \*\* $p < 0.01$ , \*\*\* $p < 0.001$ , two-tailed unpaired Student's *t*-test (*ob/ob* vs. lean). N.D., not detected. See also Supplementary Figure 4.

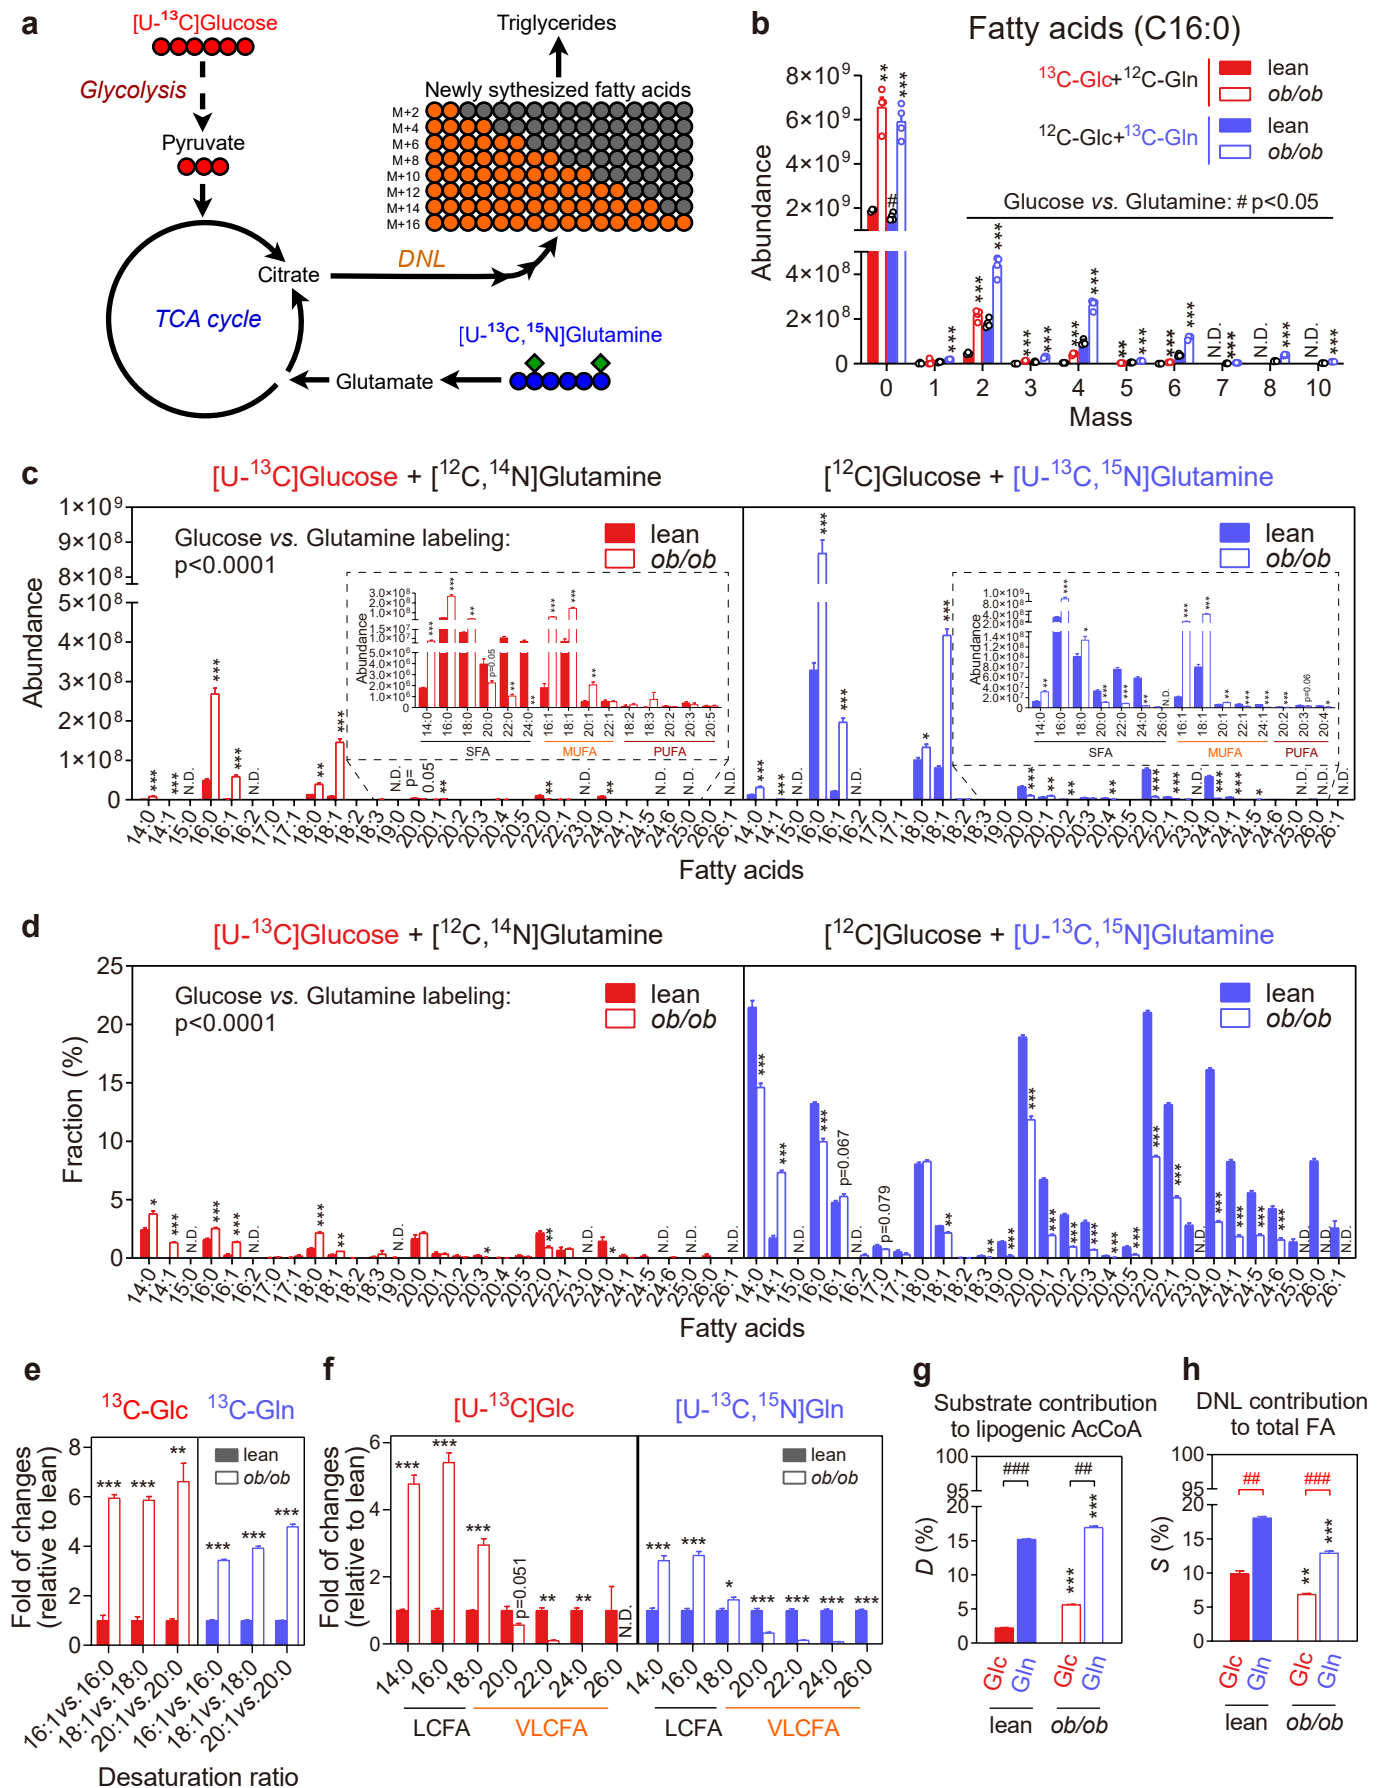

Figure 4 (legend on next page)



#### Figure 4. Carbon backbone flux from glucose and glutamine toward fatty acids

**a**, Schematic illustration of glucose and glutamine carbon backbone flux toward fatty acid (FA) synthesis. Lean and *ob/ob* primary hepatocytes were primed with M199 and 10 nM insulin for 45 minutes. Then the culture medium was replaced with M199 and 10 nM insulin supplemented with either 10 mM [ $^{13}\text{C}$ ]Glc plus 2.5 mM unlabeled Gln or 2.5 mM [ $^{13}\text{C}$ ,  $^{15}\text{N}$ ]Gln plus 10mM unlabeled Glc for 6 hours. M199 contained 0.61mM acetate and other essential nutrients for hepatocytes culture.

**b**, Abundance of triglyceride palmitate (C16:0 FA) isotopomers in lean and *ob/ob* primary hepatocytes traced with either 10 mM [ $^{13}\text{C}$ ]Glc or 2.5 mM [ $^{13}\text{C}$ ,  $^{15}\text{N}$ ]Gln as described in (a).

**c,d**, Normalized (c) and fractional (d) abundance of  $^{13}\text{C}$ -labeled triglyceride fatty acid isotopomers in primary hepatocytes traced with either 10 mM [ $^{13}\text{C}$ ]Glc or 2.5 mM [ $^{13}\text{C}$ ,  $^{15}\text{N}$ ]Gln. The abundance of isotopomers with odd numbers of  $^{13}\text{C}$  was very low and excluded from all calculations. SFA, saturated fatty acids; MUFA, monounsaturated fatty acids; PUFA, polyunsaturated fatty acids.

**e**, Relative abundance of  $^{13}\text{C}$ -labeled even chain MUFA compared to corresponding SFA in lean and *ob/ob* primary hepatocytes.

**f**, Relative abundance of all  $^{13}\text{C}$ -labeled FA isotopomers compared to the total amount of corresponding FA in lean mice primary hepatocytes. LCFA, long chain fatty acids of C16 and C18; VLCFA, very long chain fatty acids of C20-26.

**h, i**, Fractional contribution of  $^{13}\text{C}$ -labeled acetyl-CoA (AcCoA) ( $D\%$ , **h**) toward the total lipogenic AcCoA pool, and the contribution of *de novo* synthesized fatty acid ( $S\%$ , **i**) during the period of tracing studies toward total fatty acid pool.  $D\%$  and  $S\%$  are calculated through the isotopomer aggregation method (see materials and methods) using isotopomer fractional abundance and  $^{13}\text{C}$  mole percent enrichment (MPE) of palmitate (C16:0 FA) as input (see Supplementary Figure 5g). Red line and # text labeling denote the estimation bias of  $S\%$ . Please refer to Supplementary Figure 7] for comparison.

Data are presented as means  $\pm$  SEM,  $n=4$  except that one sample was discarded in the  $^{13}\text{C}$  Glc-labeled lean group; text labeled  $0.05 < p < 0.1$ ,  $*p < 0.05$ ,  $**p < 0.01$ ,  $***p < 0.001$  (*ob/ob* vs. lean) and  $\#p < 0.05$  or text labeled (Glc vs. Gln) by two-tailed unpaired Student's *t*-test; text labeling on the top left of panel **c-d** are significant based on two-way ANOVA (Glc vs. Gln). N.D., not detected. See also Supplementary Figure 5, 6, 7.

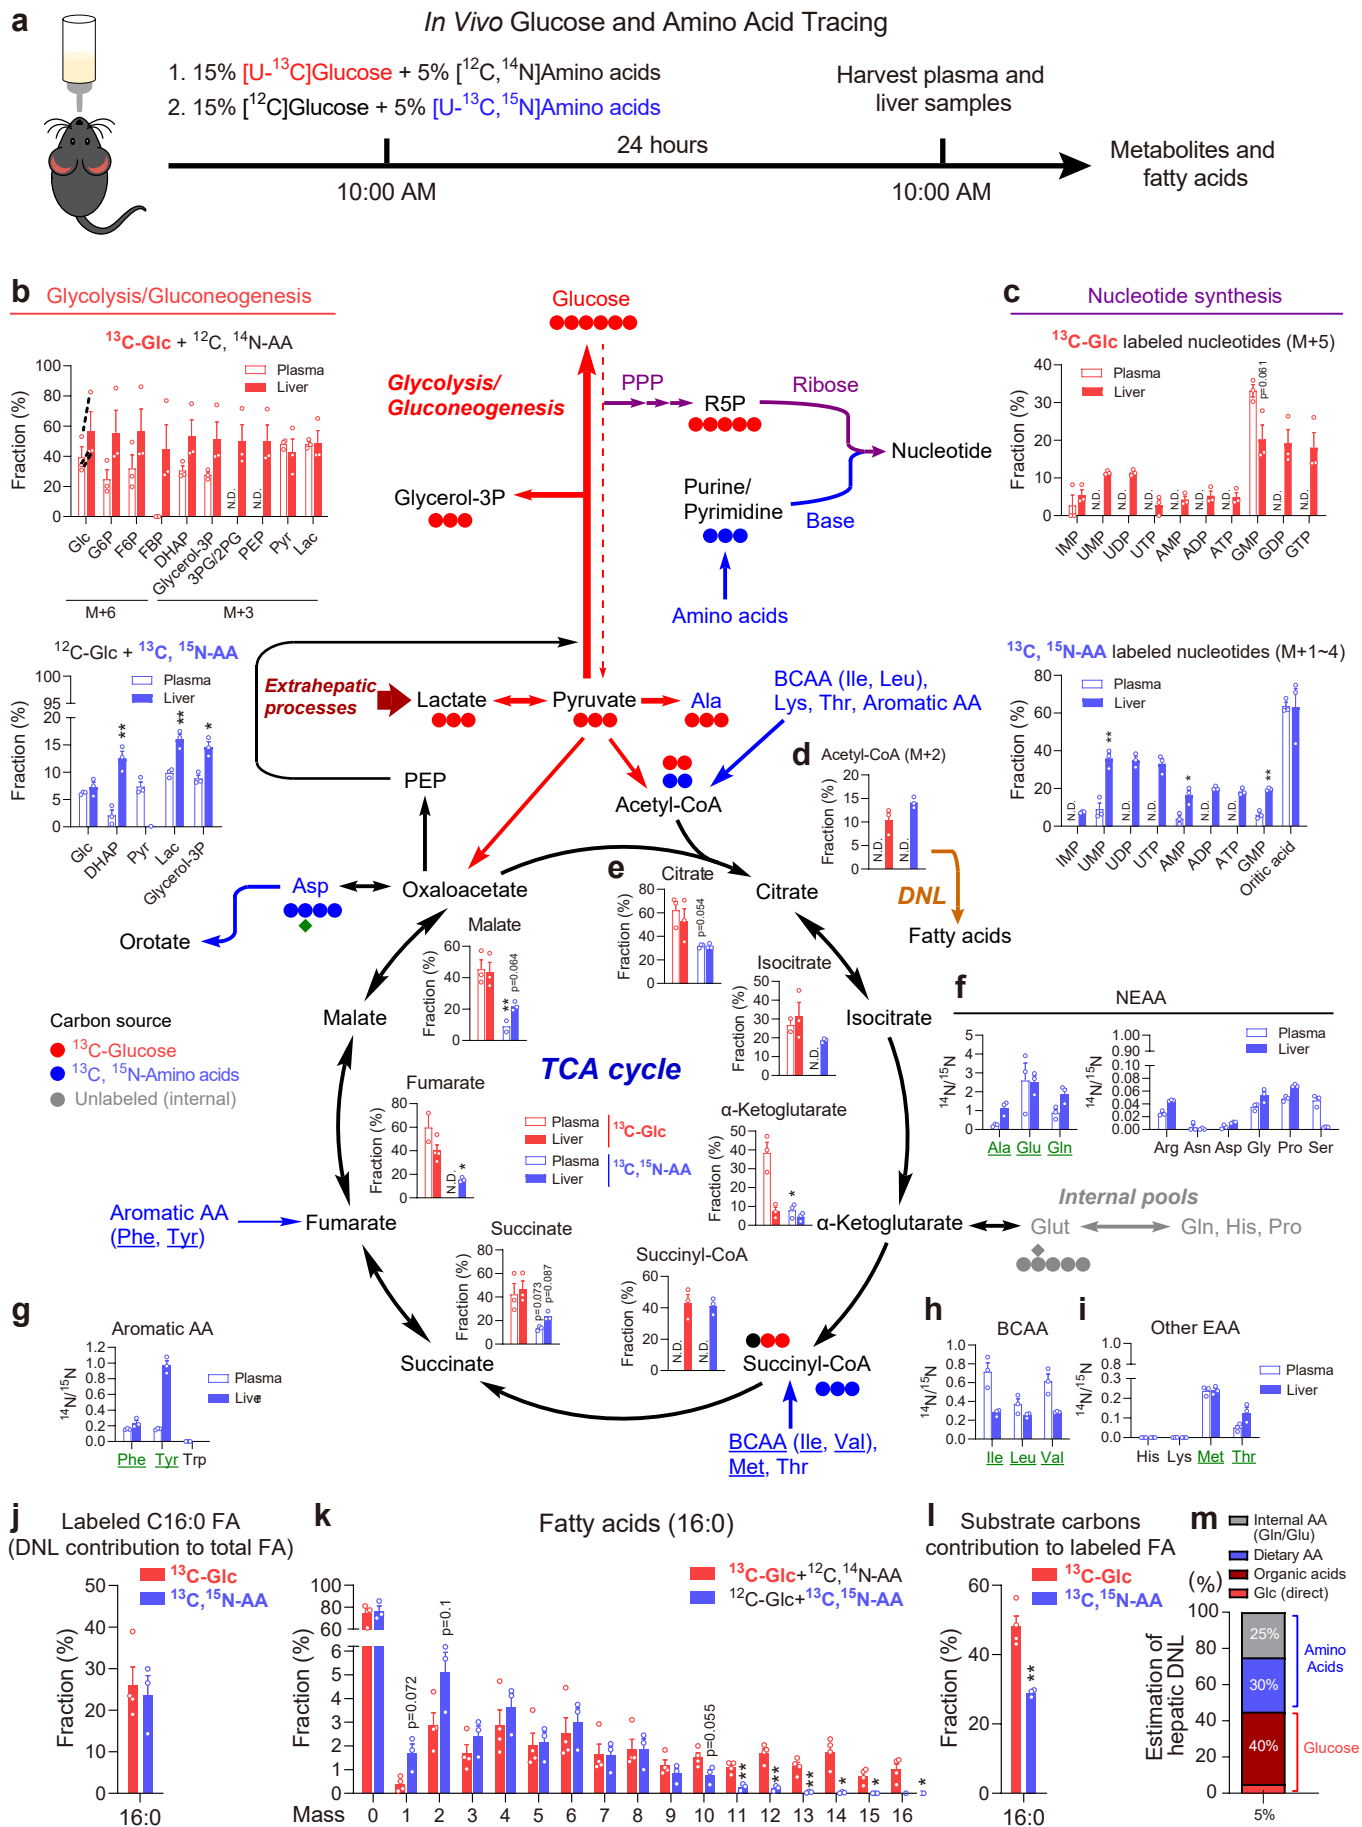

Figure 5 (legend on next page)

### Figure 5. *In vivo* metabolic flux of glucose and amino acids

**a**, Schematic illustration of experimental design for *in vivo* glucose and amino acid isotope tracing. 12-week-old mice were fed with drinking water containing either 15% [U-<sup>13</sup>C]glucose plus 5% unlabeled amino acid mixture or 15% unlabeled glucose plus 5% [U-<sup>13</sup>C,<sup>15</sup>N]amino acid mixture for 24 hours.

**b, c**, Fractional abundance of <sup>13</sup>C labeled glycolysis/gluconeogenesis (**b**) and nucleotide synthesis (**c**) intermediates in plasma (open bar) and liver (solid bar) traced with either [U-<sup>13</sup>C]glucose (upper) or [U-<sup>13</sup>C, <sup>15</sup>N]amino acid mixture (lower).

**d, e**, Fractional abundance of <sup>13</sup>C labeled liver acetyl-CoA (**d**) and TCA cycle intermediates (**e**) traced with either [U-<sup>13</sup>C]glucose or [U-<sup>13</sup>C, <sup>15</sup>N]amino acid mixture.

**f, g, h, i**, The <sup>13</sup>C<sup>14</sup>N/<sup>13</sup>C<sup>15</sup>N ratio of amino acids indicating catabolic rate (catabolism vs. reamination): NEAA (except tyrosine, **f**), aromatic AA (**g**), branched chain amino acids (BCAA, **h**), and other EAA (**i**). AA with high <sup>13</sup>C<sup>14</sup>N/<sup>13</sup>C<sup>15</sup>N ratio (>0.1) are labeled with underlined green texts.

**j, k**, Total (**j**) and separate (**k**) fractional abundance of <sup>13</sup>C labeled liver triglyceride palmitate (fatty acid 16:0) isotopomers.

**l**, Fractional abundance of the labeled carbons in the newly synthesized palmitate (**j**).

**m**, Schematic illustration for the estimation of hepatic DNL substrates composition.

Data are presented as means ± SEM; text labeled 0.05 < p < 0.1, \*p < 0.05, \*\*p < 0.01, \*\*\*p < 0.001 (plasma vs. liver or Glc vs. AA). N.D., not detected. See also Supplementary Figure 8.

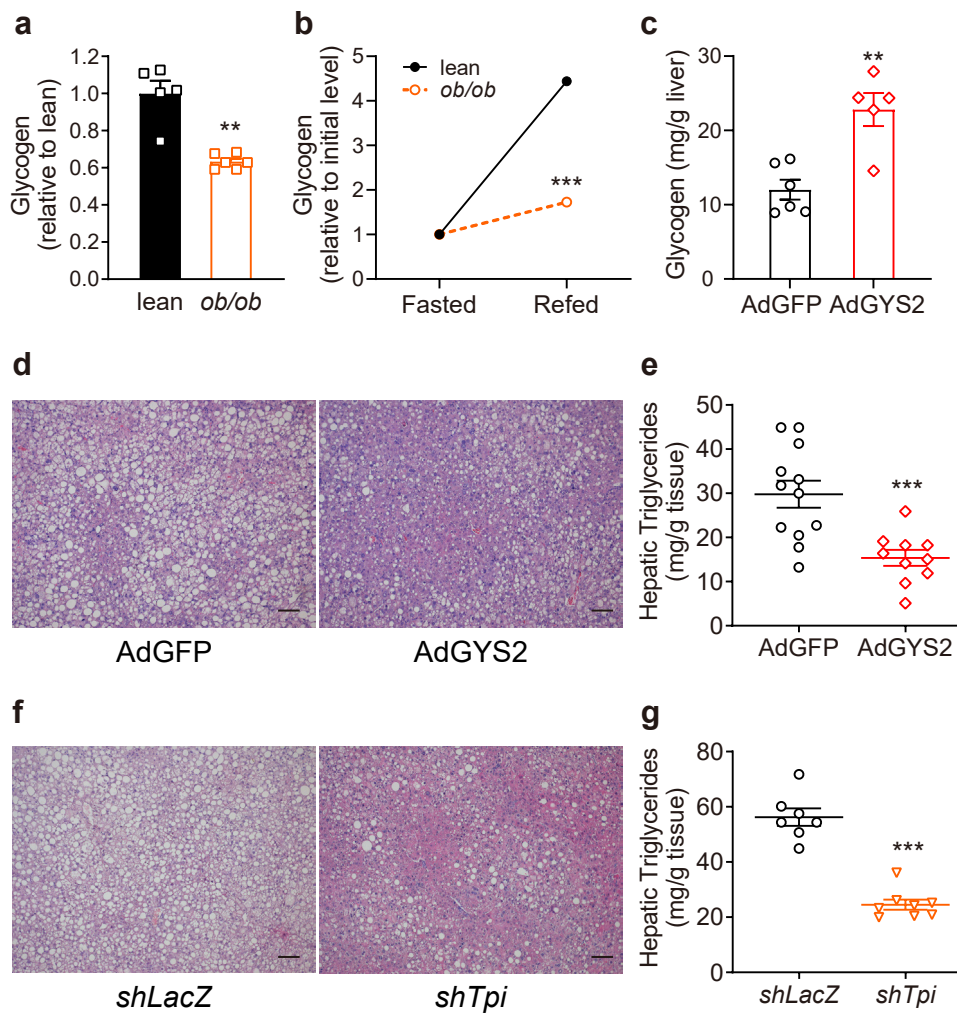

**Figure 6. Inhibition of glycolytic glycerol-3P synthesis reduces hepatic triglyceride content**

**a**, Glycogen quantification in lean (n=5) and *ob/ob* (n=6) mouse primary hepatocytes at basal state (4 hours after seeding).

**b**, Measurement of glycogen synthesis in lean and *ob/ob* mouse primary hepatocytes. Hepatocytes were fasted in minimal medium for 2 hours and then incubated in complete medium (M199) containing 25 mM glucose, 100 nM insulin, 5% FBS for 4 hours (n=4).

**c**, Measurement of hepatic glycogen levels in the *ob/ob* mice expressing either GFP (AdGFP, control, n=5) or GYS2 (AdGYS2, n=6), seven days post adenovirus administration.

**d, e**, Haematoxylin & eosin (H&E) staining (**d**) and triglyceride measurement (**e**) of liver samples from *ob/ob* mice expressing GFP (n=12) and GYS2 (n=10). Scale bars, 50  $\mu$ m.

**f, g**, H&E staining (**f**) and triglyceride measurement (**g**) of liver tissues expressing shRNA targeting either *LacZ* (*shLacZ*, control, n=7) or *Tpi* (*shTpi*, n=8) in the *ob/ob* mice. Scale bars, 50  $\mu$ m.

**h**, Illustration of glycolytic flux contribution to lipid synthesis.

All measurements are presented as means  $\pm$  SEM; text labeled 0.05 < p < 0.1, \*p < 0.05, \*\*p < 0.01, \*\*\*p < 0.001, two-tailed unpaired Student's *t*-test. N.D., not detected. See also Supplementary Figure 9.

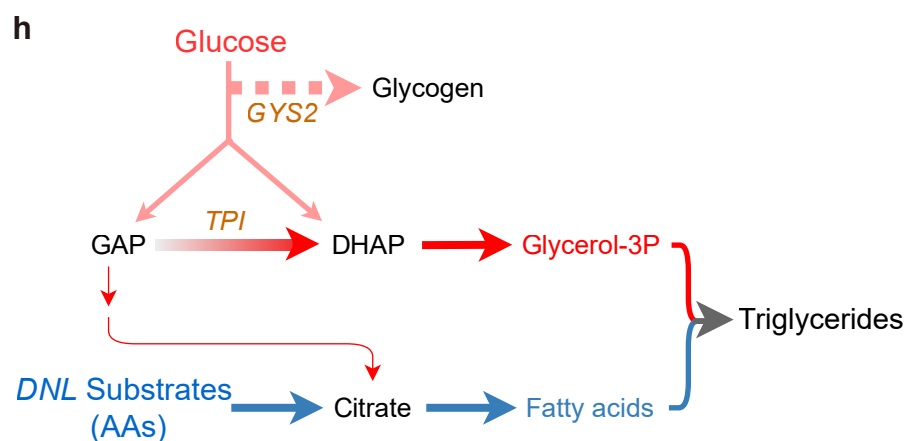

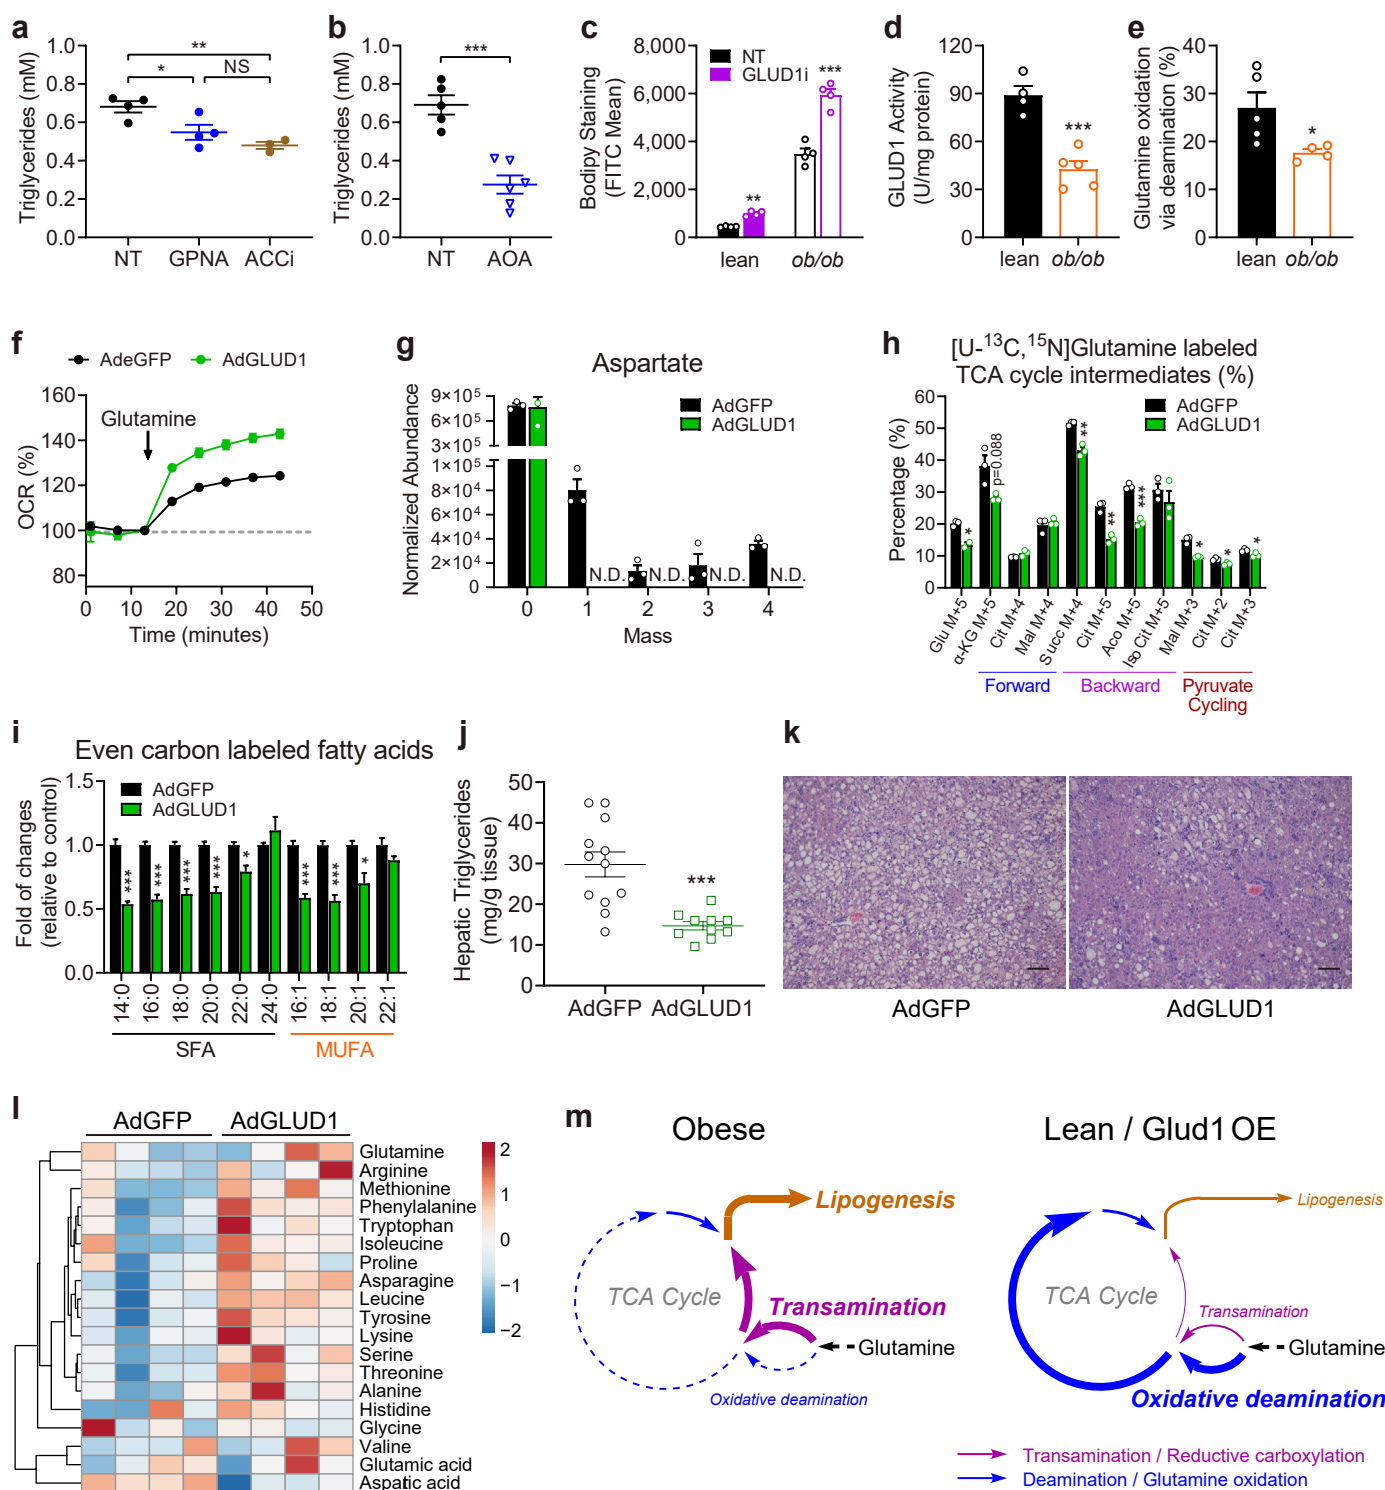

**Figure 7. Broad and pathway-specific manipulation of glutamine metabolism alleviates hepatic steatosis**

**a,b**, Triglyceride measurements of primary hepatocytes cultured in the presence or absence of glutamine transporter inhibitor L-γ-glutamyl-p-nitroanilide (GPNA, 2.5 mM, n=4, a), acetyl-CoA carboxylase inhibitor (ACCI, 10 μM, n=4, a), or transaminase inhibitor aminoxyacetate (AOA, 4 mM, n=6, b).

**c**, Measurement of triglyceride content by BODIPY staining in primary hepatocytes cultured in the presence or absence of glutamate dehydrogenase 1 inhibitor GLUD1i (R162, 40 μM, n=4) overnight.

**d**, Measurement of GLUD1 activity in liver tissue samples prepared from lean and *ob/ob* mice (n=4 and 5 respectively).

**e**, Measurement of glutamine oxidation capacity in primary hepatocytes prepared from lean and *ob/ob* mice as determined by the percentage of glutamine-induced oxygen consumption not suppressible by transaminase inhibitor AOA. n=3 for the lean, 4 for the *ob/ob* group.

- f**, Measurement of glutamine oxidation in primary hepatocytes expressing either eGFP (control, n=4) or GLUD1 (n=3).
- (g)** Isotopomer abundance of aspartate in [ $U$ - $^{13}C$ ,  $^{15}N$ ]Gln-traced (1 hour) primary hepatocytes prepared from *ob/ob* mice expressing either GFP (AdGFP, control) or GLUD1 (AdGLUD1), isolated three days post adenovirus administration, n=3.
- h**, Fractional abundance of  $^{13}C$ -labeled TCA intermediates compared to the total (labeled and unlabeled) in [ $U$ - $^{13}C$ ,  $^{15}N$ ]Gln-traced (1 hour) primary hepatocytes treated as in **(g)**.
- i**, Fractional abundance of  $^{13}C$ -labeled triglyceride fatty acid (FA) species in primary hepatocytes treated as in **(g)**.
- j-k**, Triglyceride measurements (**j**) and H&E staining (**k**) of liver samples prepared from *ob/ob* mice expressing GFP (AdGFP, n=12, same control group as in Fig. 5g) or GLUD1 (AdGLUD1, n=10). Scale bars, 50  $\mu$ m.
- l**, Measurement of amino acid profiles in the liver tissue samples prepared from *ob/ob* mice expressing either GFP or GLUD1. Tissue samples were collected 10 days post virus administration. Color scale denotes row scaling z-scores.
- m**, Schematic illustration of obesity-induced perturbation in hepatic glutamine metabolism.
- All measurements are presented as means  $\pm$  SEM; text labeled  $0.05 < p < 0.1$ , \* $p < 0.05$ , \*\* $p < 0.01$ , \*\*\* $p < 0.001$ , two-tailed unpaired Student's *t*-test. N.D., not detected. See also Supplementary Figure 10 and 11.



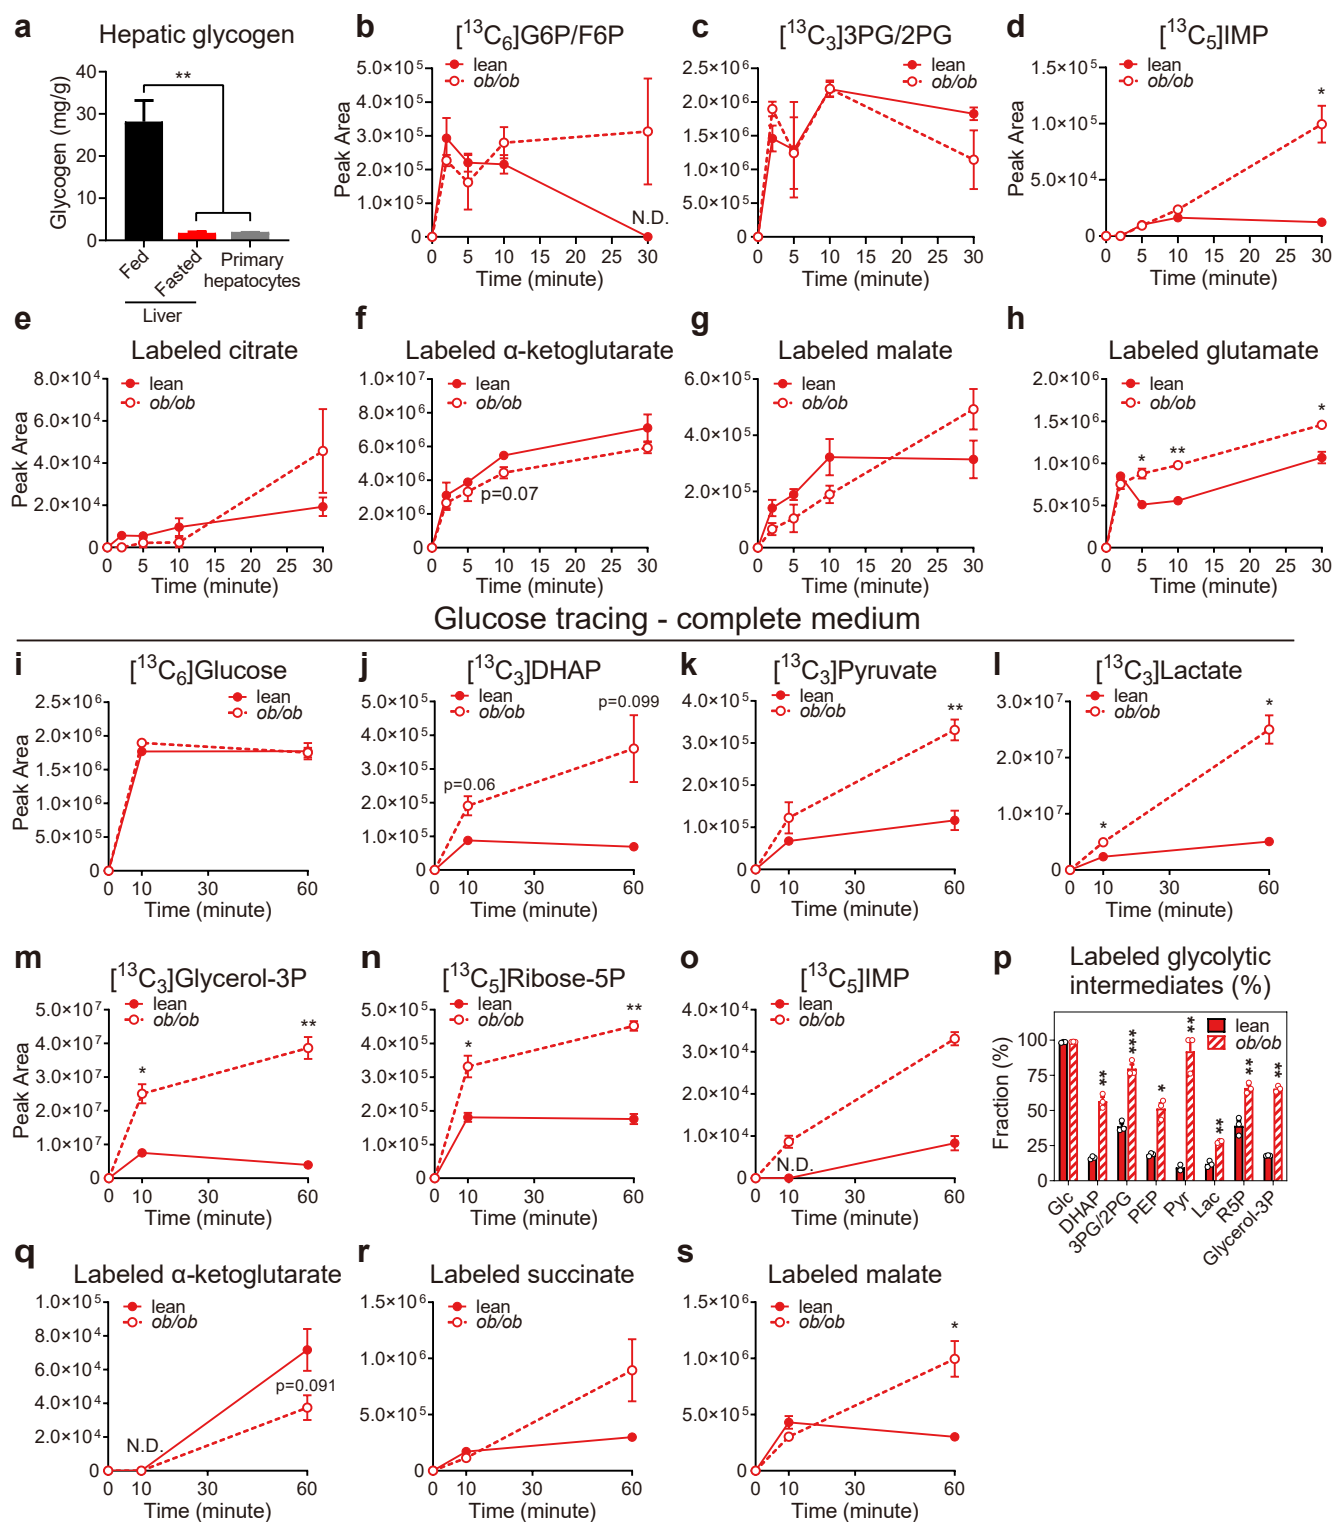

**Supplementary Figure 1. Related to Figure 1; Other glycolysis intermediates, and the glucose flux in complete medium**

**a**, Glycogen level of liver from fed and overnight fasted mice compared with that of primary hepatocytes ready for tracing (4 hours after isolation).

**b-d**, Accumulation of uniform,  $^{13}\text{C}$  isotope-labeled glucose and metabolites in lean and *ob/ob* mice primary hepatocytes during the course of [ $^{13}\text{C}$ ]Glc tracing in minimal medium. Glucose, Glc; glucose 6-phosphate/fructose 6-phosphate, G6P/F6P; 3-phosphoglycerate/2-phosphoglycerate, 3PG/2PG; inosine monophosphate, IMP.

**e-h**, Accumulation kinetics of  $^{13}\text{C}$ -labeled TCA cycle intermediates in primary hepatocytes traced in minimal medium.

**i-o**, Accumulation kinetics of uniform,  $^{13}\text{C}$  isotope-labeled glucose and metabolites in primary hepatocytes traced in complete medium (DMEM containing 4 mM glutamine and other amino acids).

**p**, Fractional abundance of [ $^{13}\text{C}$ ]-labeled glycolysis intermediates in hepatocytes traced in complete medium compared to the total of corresponding metabolites at steady state (60 minutes).

**q-s**, Accumulation kinetics of  $^{13}\text{C}$ -labeled TCA cycle intermediates in hepatocytes traced in complete medium.

Data are presented as means  $\pm$  SEM,  $n = 3$ ; text labeled  $0.05 < p < 0.1$ , \* $p < 0.05$ , \*\* $p < 0.01$ , \*\*\* $p < 0.001$ , two-tailed unpaired Student's *t*-test (*ob/ob* vs. lean). N.D., not detected.

## Unlabeled and labeled glycolytic metabolites - minimal medium

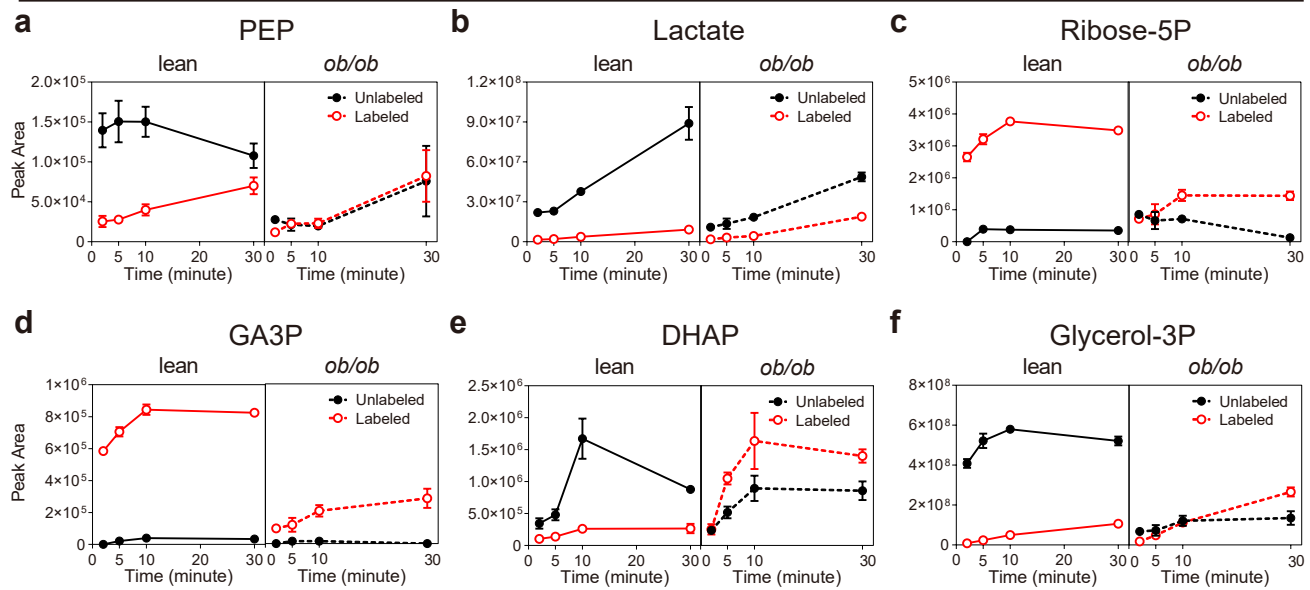

**Supplementary Figure 2. Related to Figure 1; Comparison between glucose and non-glucose substrates flux**  
**a-f**, Changes of unlabeled and <sup>13</sup>C-labeled TCA cycle intermediates abundance in hepatocytes traced in minimal medium, the same experiment with Fig. 1.

Data are presented as means ± SEM, n=3.



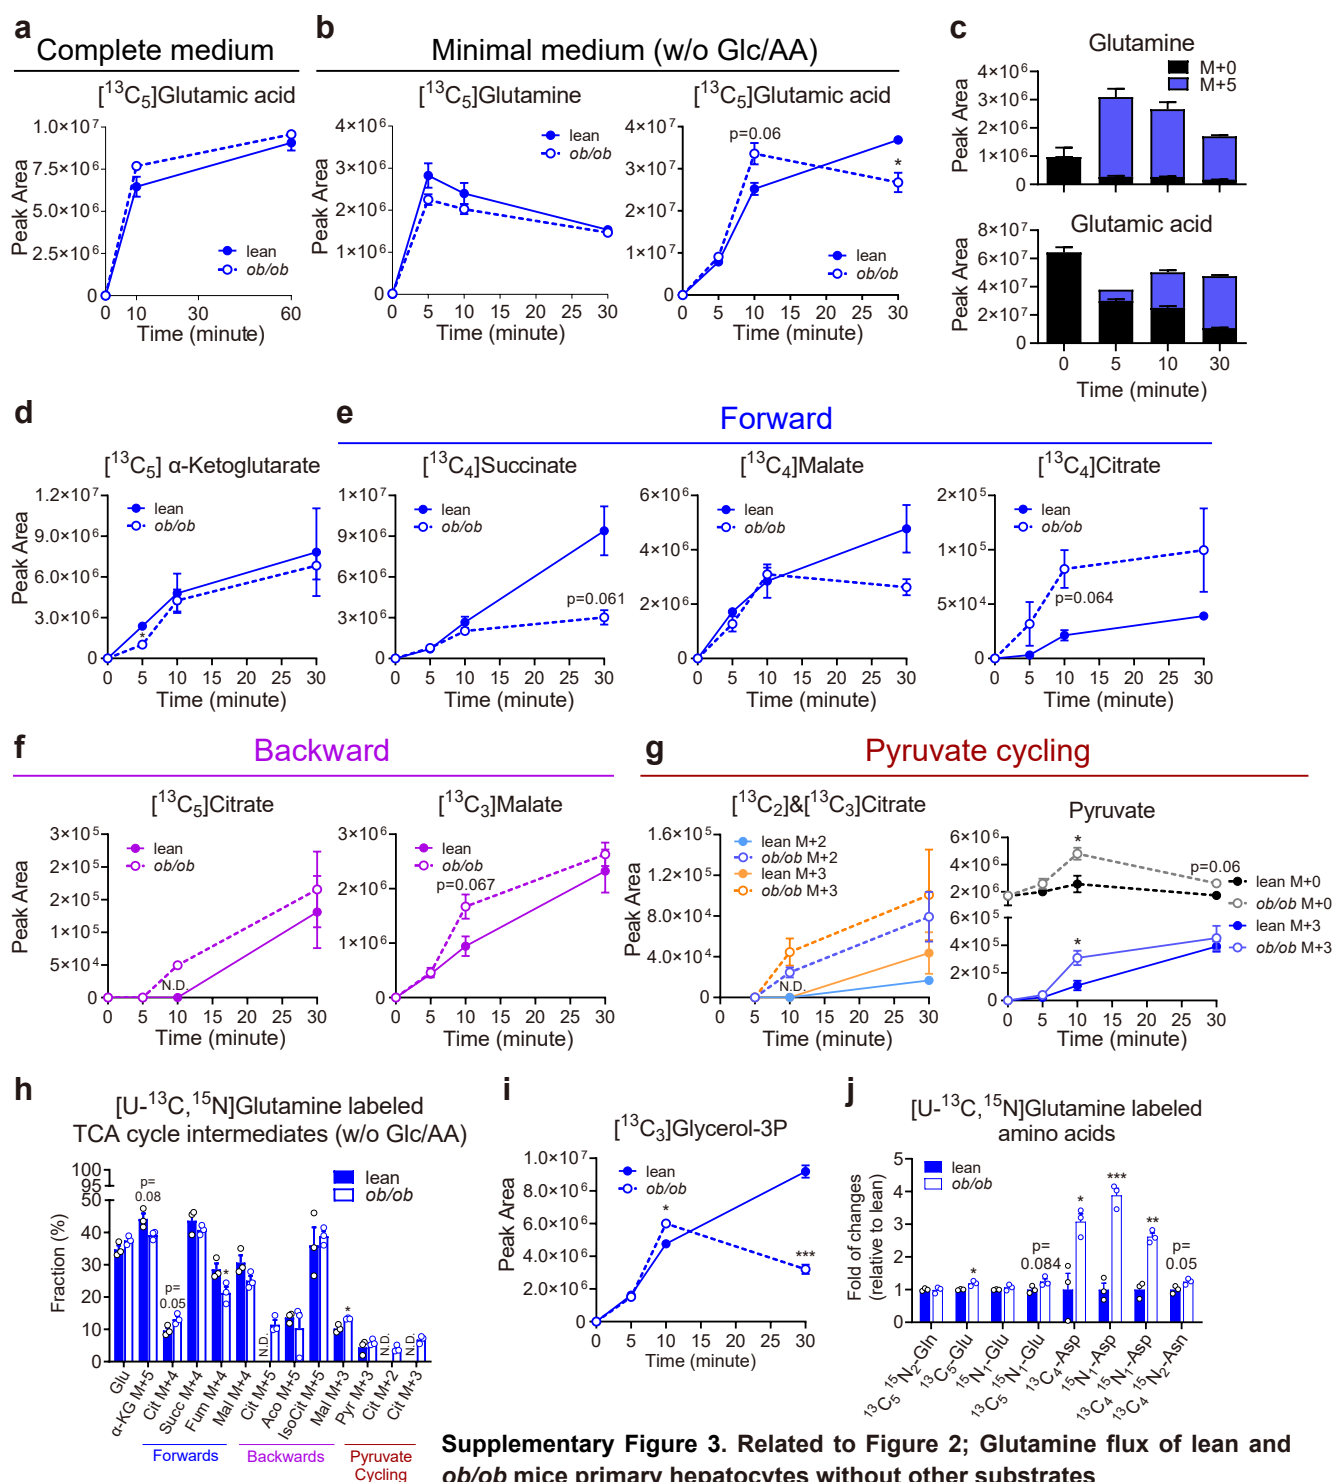

**Supplementary Figure 3. Related to Figure 2; Glutamine flux of lean and *ob/ob* mice primary hepatocytes without other substrates**

**a**, Accumulation kinetics of  $^{13}\text{C}$  isotope-labeled glutamic acid (M+5) in lean and *ob/ob* mice primary hepatocytes after the addition of  $[U-^{13}\text{C}, ^{15}\text{N}]$ glutamine in complete medium.

**b**, Accumulation kinetics of  $^{13}\text{C}$ -labeled glutamine (left) and glutamic acid (right) isotopomers (M+5) in hepatocytes traced in minimal medium.

**c**, Abundance of glutamine (upper) and glutamic acid (lower) M+0 or M+5 isotopomer in hepatocytes during tracing in minimal medium.

**d-g**, Accumulation kinetics of  $^{13}\text{C}$  isotope-labeled TCA cycle intermediates in hepatocytes traced in minimal medium.

**h**, Accumulation kinetics of  $^{13}\text{C}$  isotope-labeled glycerol-3P (M+3) in lean and *ob/ob* mice primary hepatocytes during  $[U-^{13}\text{C}, ^{15}\text{N}]$ Gln tracing.

**i**, Fractional abundance of all  $^{13}\text{C}$  isotope-labeled TCA cycle intermediates compared to their respective total in the primary hepatocytes 10 minutes after the addition of by  $[U-^{13}\text{C}, ^{15}\text{N}]$ Gln in minimal medium. Glutamate, Glu; oxaloacetate, OAA; citrate, Cit; aconitate, Aco; isocitrate, IsoCit;  $\alpha$ -ketoglutarate,  $\alpha$ -KG; succinate, Succ; malate, Mal.

**j**, Fractional abundance of  $^{13}\text{C}$  or  $^{15}\text{N}$ -labeled amino acids in lean mice primary hepatocytes at 10 minutes after the addition of  $[U-^{13}\text{C}, ^{15}\text{N}]$ Gln. Data are presented as means  $\pm$  SEM,  $n=3$ ; text labeled  $0.05 < p < 0.1$ ,  $*p < 0.05$ ,  $**p < 0.01$ ,  $***p < 0.001$ , two-tailed unpaired Student's *t*-test (*ob/ob* vs. lean). N.D., not detected.

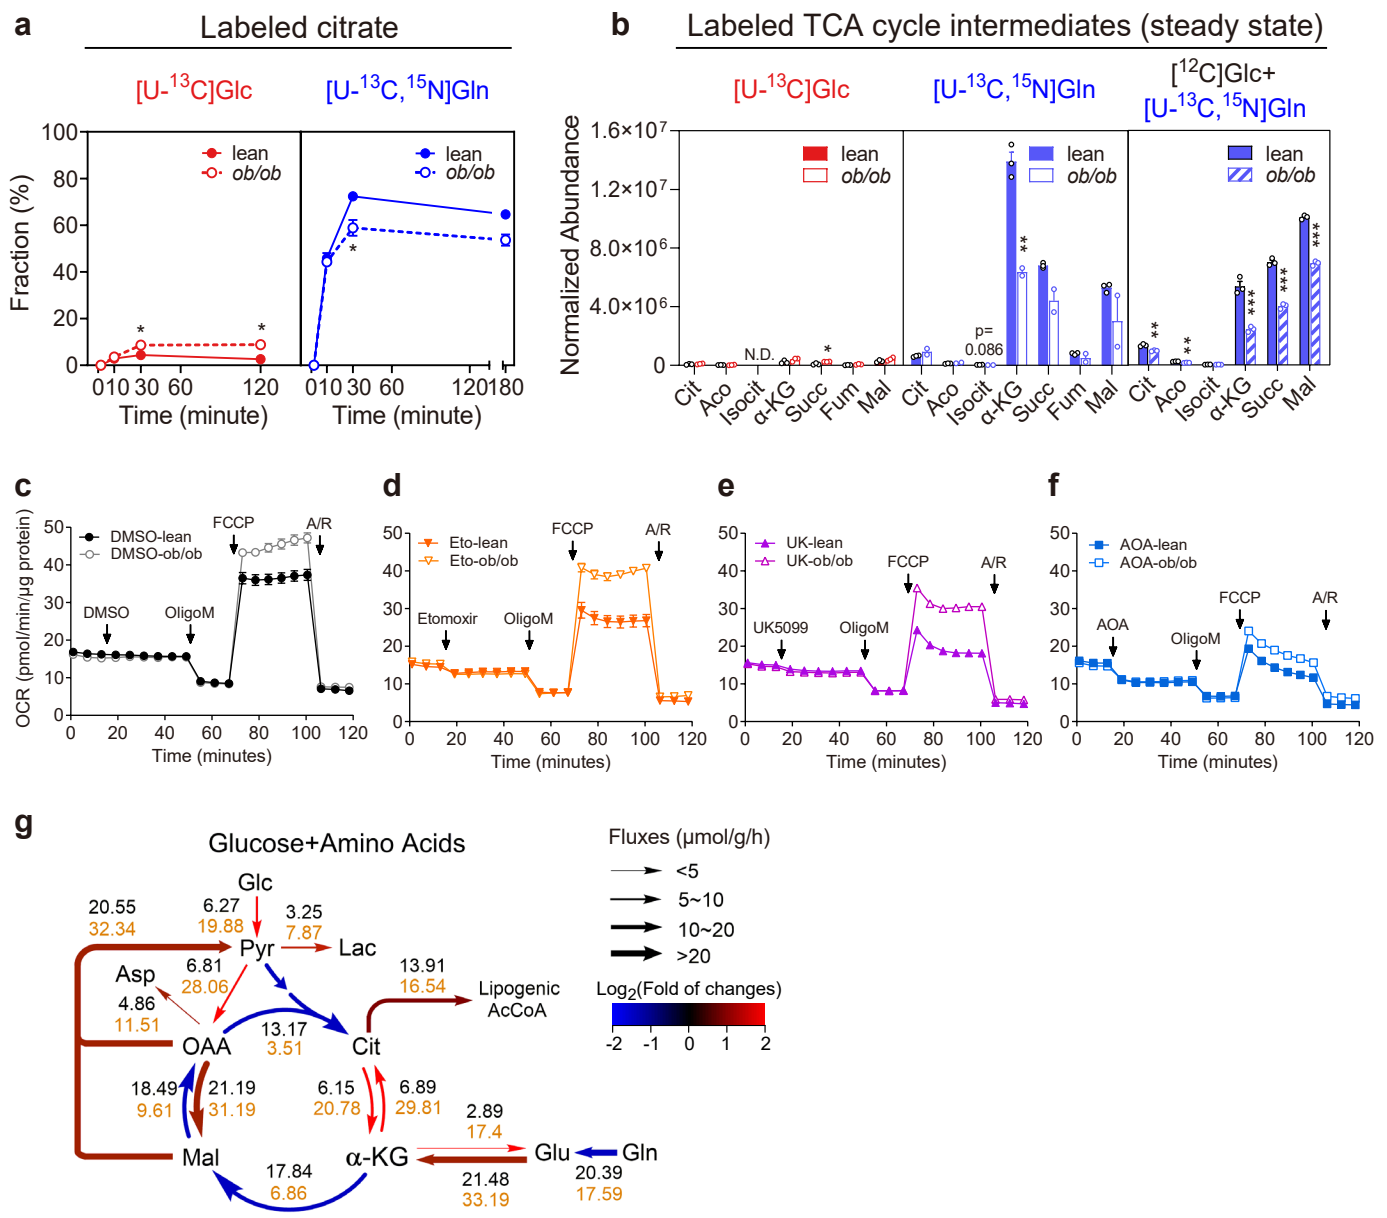

**Supplementary Figure 4. Related to Figure 3; Substrate level contribution of glucose and amino acids toward TCA cycle**

**a**, Accumulation kinetics of  $^{13}\text{C}$  isotope-labeled succinate in lean and obese primary hepatocytes traced with either 10 mM  $[\text{U-}^{13}\text{C}]\text{Glc}$  or 2.5 mM  $[\text{U-}^{13}\text{C}, ^{15}\text{N}]\text{Gln}$ .

**b**, Abundance of all  $^{13}\text{C}$  isotope-labeled TCA intermediates in primary hepatocytes at steady state. Peak areas were normalized to protein levels.

**c-f**, Measurement of mitochondria respiration in primary hepatocytes, the same assay with Fig. 3c-d. Mitochondria fuel test inhibitors and mitochondria stress test compounds were used at the following concentrations: DMSO (0.1%), etomoxir (40  $\mu\text{M}$ ), UK5099 (40  $\mu\text{M}$ ), AOA (40 mM); oligomycin (OligoM, 4  $\mu\text{M}$ ), FCCP (0.5  $\mu\text{M}$ ), antimycin A/rotenone (A/R, 2  $\mu\text{M}$ ).

**g**, Estimation of TCA cycle flux based on glutamine tracing results (summary shown in Figure 3e). Best fit fluxes of primary hepatocytes isolated from lean (black) and *ob/ob* (orange) mice are presented along with each reaction. Flux rate are expressed as  $\mu\text{mol/g}$  cells per hour. See details in Supplementary Table 1.

Data are presented as means  $\pm$  SEM, outliers beyond 1.5 $\times$ SD are removed; text labeled 0.05 < p < 0.1, \*p < 0.05, \*\*p < 0.01, \*\*\*p < 0.001, two-tailed unpaired Student's *t*-test (*ob/ob* vs. lean). N.D., not detected.

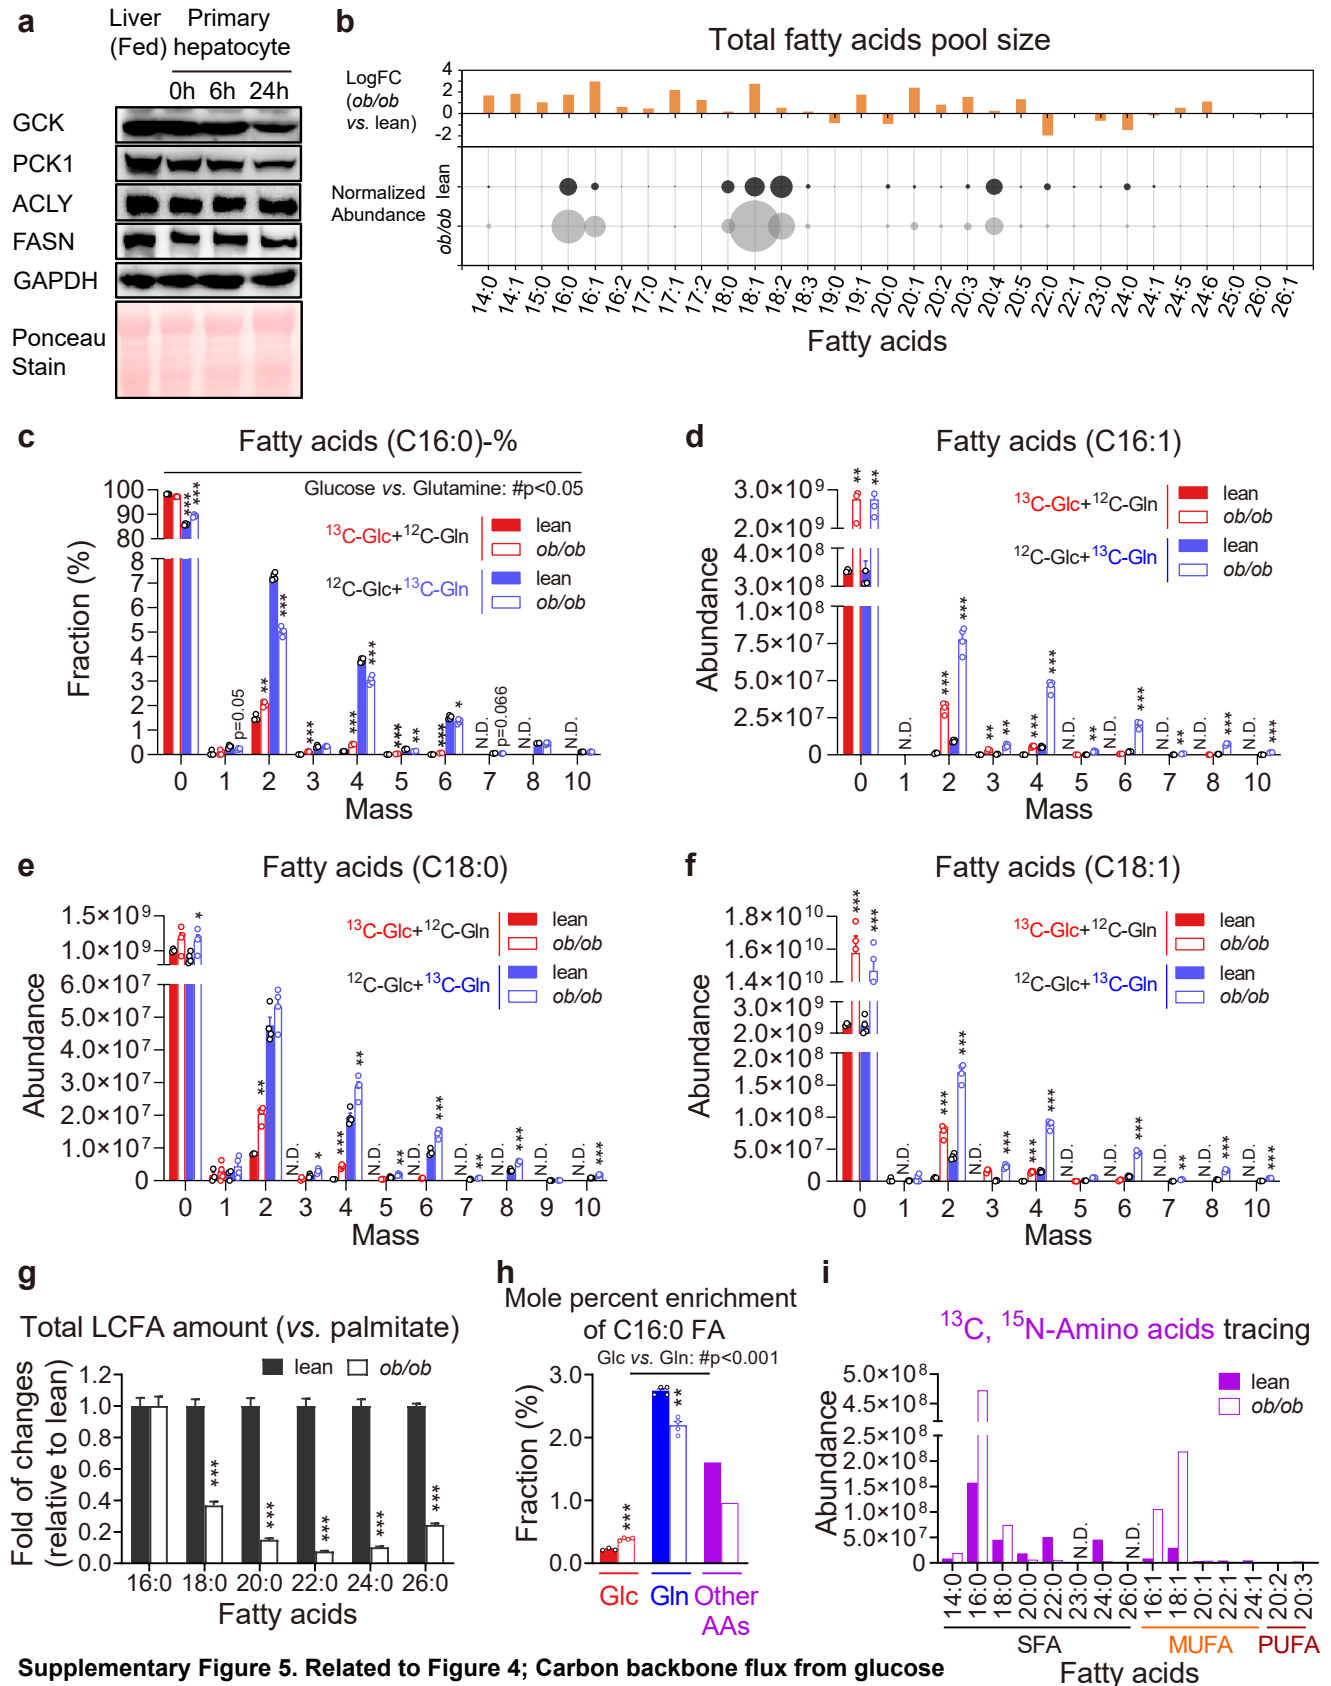

**Supplementary Figure 5. Related to Figure 4; Carbon backbone flux from glucose and amino acids toward fatty acids**

**a**, Pool sizes of different fatty acids (lower panel) normalized to palmitate levels of lean mice and the log2 fold of changes (upper panel) between lean and obese primary hepatocytes.

**b**, Immunoblot measurement of key enzyme expression levels among liver and isolated primary hepatocytes from the same fed mouse. 0, 6, and 24h denote the time upon the initiation of tracing studies.

- c**, Fractional abundance of triglyceride palmitate (C16:0 FA) isotopomers in lean and *ob/ob* primary hepatocytes traced with either 10 mM [ $^{13}\text{C}$ ]Glc or 2.5 mM [ $^{13}\text{C}$ ,  $^{15}\text{N}$ ]Gln calculated from Fig. 4b.
- d-f**, Abundance of the most enriched triglyceride FA (C16:1, C18:0, C18:1) isotopomers in lean and *ob/ob* primary hepatocytes traced with either 10 mM [ $^{13}\text{C}$ ]Glc or 2.5 mM [ $^{13}\text{C}$ ,  $^{15}\text{N}$ ]Gln.
- g**, Fractional abundance of individual triglyceride fatty acid species in lean and *ob/ob* primary hepatocytes normalized to palmitate. Gln) by two-tailed unpaired Student's *t*-test. N.D., not detected.
- h**,  $^{13}\text{C}$  Mole percent enrichment (MPE) of palmitate (C16:0 FA) labeled by each tracer in lean mice primary hepatocytes.
- i**, Combined abundance of  $^{13}\text{C}$ -labeled triglyceride fatty acid species synthesized in lean and *ob/ob* primary hepatocytes traced with [ $^{13}\text{C}$ ,  $^{15}\text{N}$ ]amino acids mixture (without glutamine). SFA, saturated fatty acids; MUFA, monounsaturated fatty acids; PUFA, polyunsaturated fatty acids.

Peaks areas are normalized to protein levels. Data are presented as means  $\pm$  SEM,  $n=4$  except that one outlier was discarded in the  $^{13}\text{C}$  Glc-labeled lean group; text labeled 0.05 <  $p$  < 0.1, \* $p$  < 0.05, \*\* $p$  < 0.01, \*\*\* $p$  < 0.001 (*ob/ob* vs. lean) and # $p$ <0.05 or text labeled (Glc vs. Gln) by two-tailed unpaired Student's *t*-test. N.D., not detected.

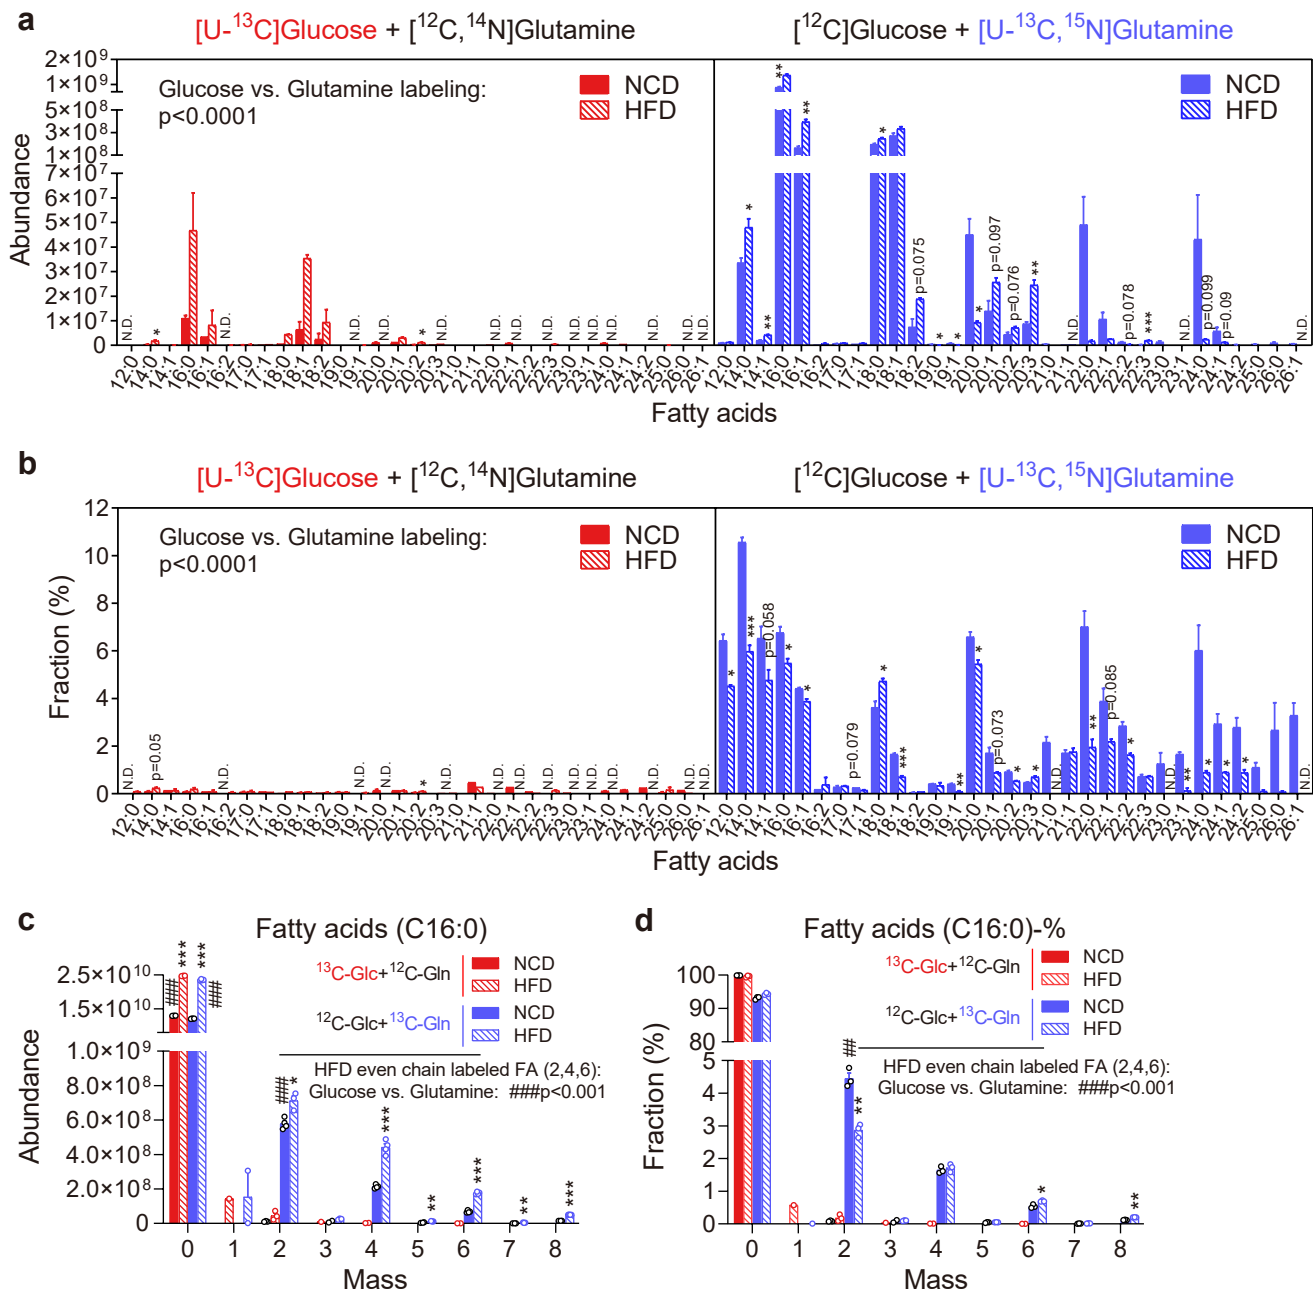

**Supplementary Figure 6. Related to Figure 4; Carbon backbone flux from glucose and amino acids toward fatty acids in primary hepatocytes isolated from normal chow diet (NCD) and high fat diet (HFD)-fed mice**

**a-b**, Absolute (**a**, peak areas normalized to protein levels) and fractional (**b**) abundance of  $^{13}C$ -labeled triglyceride fatty acid isotopomers in primary hepatocytes isolated from NCD and HFD-fed mice traced with either 10 mM  $[U-^{13}C]Glc$  or 2.5 mM  $[U-^{13}C, ^{15}N]Gln$ . The abundance of isotopomers with odd numbers of  $^{13}C$  was very low and excluded from all calculations.  $n=3$  for each group.

**c-d**, Absolute (**a**) and fractional (**b**) abundance of triglyceride palmitate (C16:0 FA) isotopomers in primary hepatocytes of NCD and HFD mice traced with either 10 mM  $[U-^{13}C]Glc$  or 2.5 mM  $[U-^{13}C, ^{15}N]Gln$ . Abundance are normalized to within-group average to minimize the bias caused by extraction efficiency. All measurements are presented as scattered data point.

Data are presented as means  $\pm$  SEM with missing values removal; text labeled  $0.05 < p < 0.1$ ,  $*p < 0.05$ ,  $**p < 0.01$ ,  $***p < 0.001$  (HFD vs. NCD) and  $###p < 0.001$  or text labeled (Glc vs. Gln) by two-tailed unpaired Student's  $t$ -test. N.D., not detected.

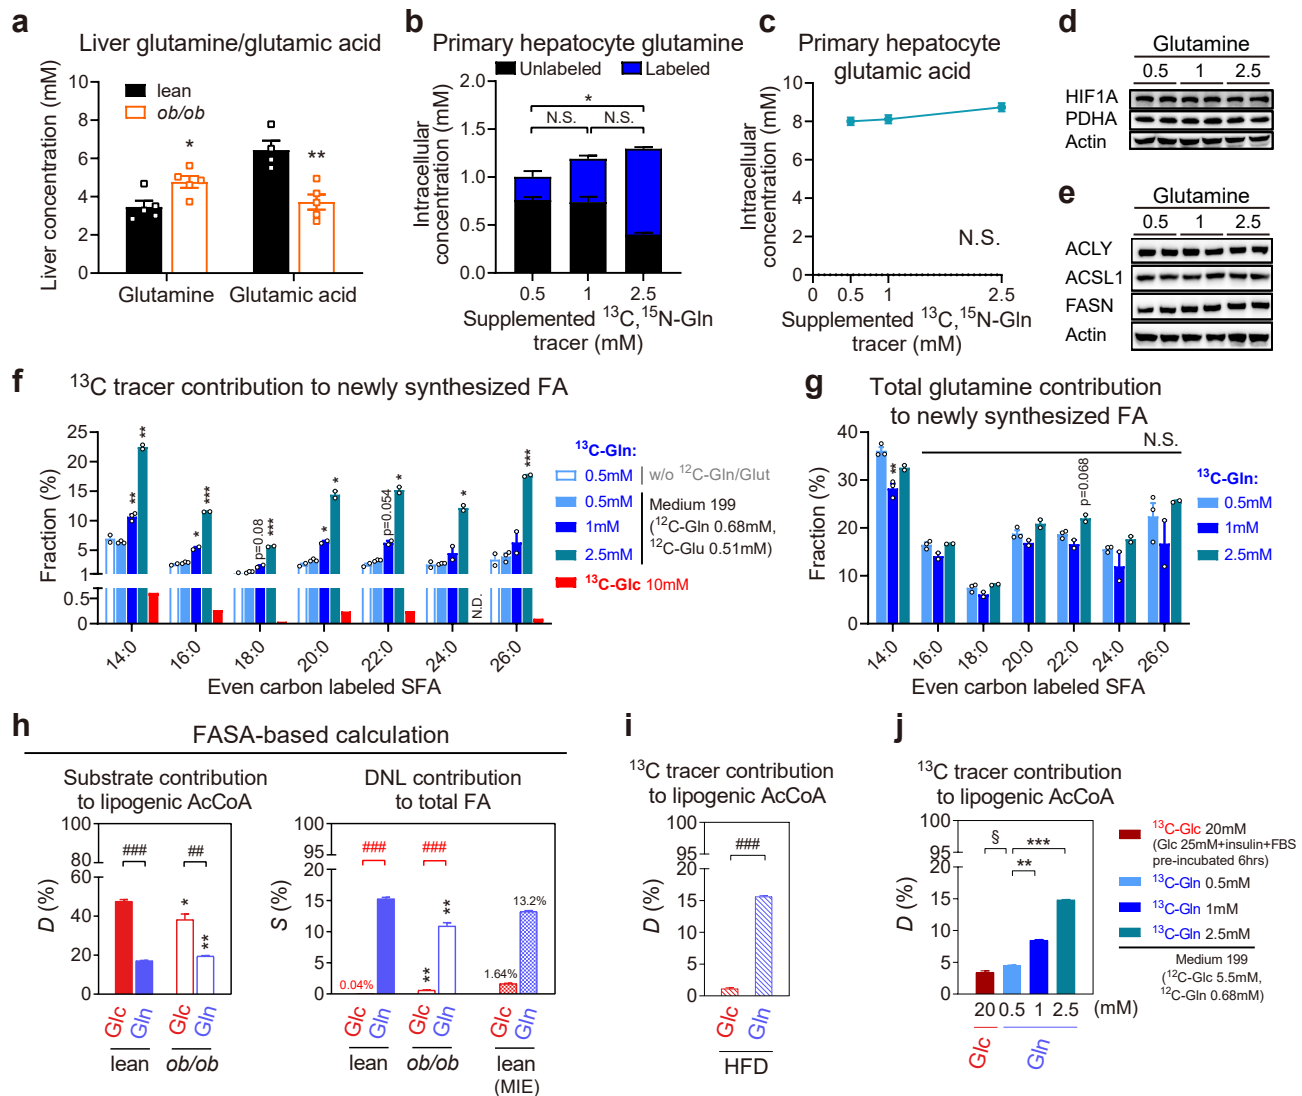

### Supplementary Figure 7. Related to Figure 4; Glutamine-DNL dose response

- a**, Quantification of glutamine and glutamic acid in liver of fed lean and *ob/ob* mice, n=5 for each group.
- b,c**, Quantification of  $^{12}\text{C}$  and  $^{13}\text{C}$  glutamine (**b**), and total glutamic acid (**c**) concentration in isolated primary hepatocytes after a 6hrs labeling (steady state). n=3 for each concentration in glutamine measurement with 1 outlier in 0.5mM group removed, n=4, 3, and 3 for in glutamic acid measurement.
- d,e**, Immunoblot measurement of protein levels of Hif1 $\alpha$  and PDHA (**d**) and lipogenic enzymes (**e**) among primary hepatocyte samples traced (6hrs) with different concentrations of glutamine in complete medium (M199).
- f**, Fractional abundance of saturated fatty acid (SFA) with even number of  $^{13}\text{C}$  in primary hepatocytes traced with either 0.5, 1, 2.5 mM [ $^{13}\text{C}$ ,  $^{15}\text{N}$ ]Gln or 10mM [ $^{13}\text{C}$ ]Glc (single sample as a reference). n=2 for DMEM (without glutamine/glutamic acid) and n=3 for M199 complete medium. Outlier data points caused by poor fatty acid extraction efficiency were excluded.
- g**, Total glutamine contribution to FA synthesis, calculated by normalizing fractional abundance of SFA in (**f**) to the [ $^{13}\text{C}$ ,  $^{15}\text{N}$ ]glutamine fraction of total intracellular glutamine pool (**b**).
- h**, Fractional contribution of  $^{13}\text{C}$ -labeled acetyl-CoA (AcCoA) ( $D\%$ ) toward the total lipogenic AcCoA pool, and the contribution of *de novo* synthesized fatty acid ( $S\%$ ) during the period of tracing studies toward total fatty acid pool.  $D\%$  and  $S\%$  are calculated by best fitting based tool FASA (Fatty Acid Source Analysis). Red line and # text labeling indicates the estimation bias of  $S\%$ . Lean group mass isotopomer enrichment (MIE, fractional abundances of palmitate isotopomers with even number  $^{13}\text{C}$ ) serve as the lower limit reference of *de novo* lipogenesis contribution. Please refer to Figure 4h-i for comparison.
- i**,  $D\%$  of HFD primary hepatocytes (shown in Supplementary Figure 5) traced with [ $^{13}\text{C}$ ]Glc and [ $^{13}\text{C}$ ,  $^{15}\text{N}$ ]Gln calculated by isotopomer aggregation method using isotopomer and even number  $^{13}\text{C}$  mole percent enrichment (MPE) of palmitate as the input.
- j**,  $D\%$  of primary hepatocytes traced with high glucose and different concentration of Gln tracer calculated by isotopomer aggregation method using data from (**f**) and (**i**). Data of Gln 1 mM group serve as the endogenous reference for  $D\%$  normalization between 2 batch of cells. Data are presented as means  $\pm$  SEM; text labeled 0.05 < p < 0.1, \*p < 0.05, \*\*p < 0.01, \*\*\*p < 0.001, # text labeled for Glc vs. Gln and § text labeled for low and high Glc comparison by are calculated by two-tailed unpaired Student's *t*-test. N.S., not significant. N.D., not detected. Glc, glucose; Gln, glutamine; Glut, glutamic acid.

**j**, Fractional contribution of  $^{13}\text{C}$ -labeled acetyl-CoA (AcCoA) ( $D\%$ ) toward the total lipogenic AcCoA pool, and the contribution of *de novo* synthesized fatty acid ( $S\%$ ) during the period of tracing studies toward total fatty acid pool.  $D\%$  and  $S\%$  are calculated by best fitting based tool FASA (Fatty Acid Source Analysis). Red line and # text labeling indicates the estimation bias of  $S\%$ . Lean group mass isotopomer enrichment (MIE, fractional abundances of palmitate isotopomers with even number  $^{13}\text{C}$ ) serve as the lower limit reference of *de novo* lipogenesis contribution. Please refer to Figure 4h-i for comparison.

**k**,  $D\%$  of HFD primary hepatocytes (shown in Supplementary Figure 5) traced with  $[\text{U-}^{13}\text{C}]\text{Glc}$  and  $[\text{U-}^{13}\text{C}, ^{15}\text{N}]\text{Gln}$  calculated by isotopomer aggregation method using isotopomer and even number  $^{13}\text{C}$  mole percent enrichment (MPE) of palmitate as the input.

**l**,  $D\%$  of primary hepatocytes traced with high glucose and different concentration of Gln tracer calculated by isotopomer aggregation method using data from (f) and (i). Data of Gln 1 mM group serve as the endogenous reference for  $D\%$  normalization between 2 batch of cells.

Data are presented as means  $\pm$  SEM; text labeled 0.05 < p < 0.1, \*p < 0.05, \*\*p < 0.01, \*\*\*p < 0.001, # text labeled for Glc vs. Gln and § text labeled for low and high Glc comparison by are calculated by two-tailed unpaired Student's *t*-test. N.S., not significant. N.D., not detected. Glc, glucose; Gln, glutamine; Glut, glutamic acid.



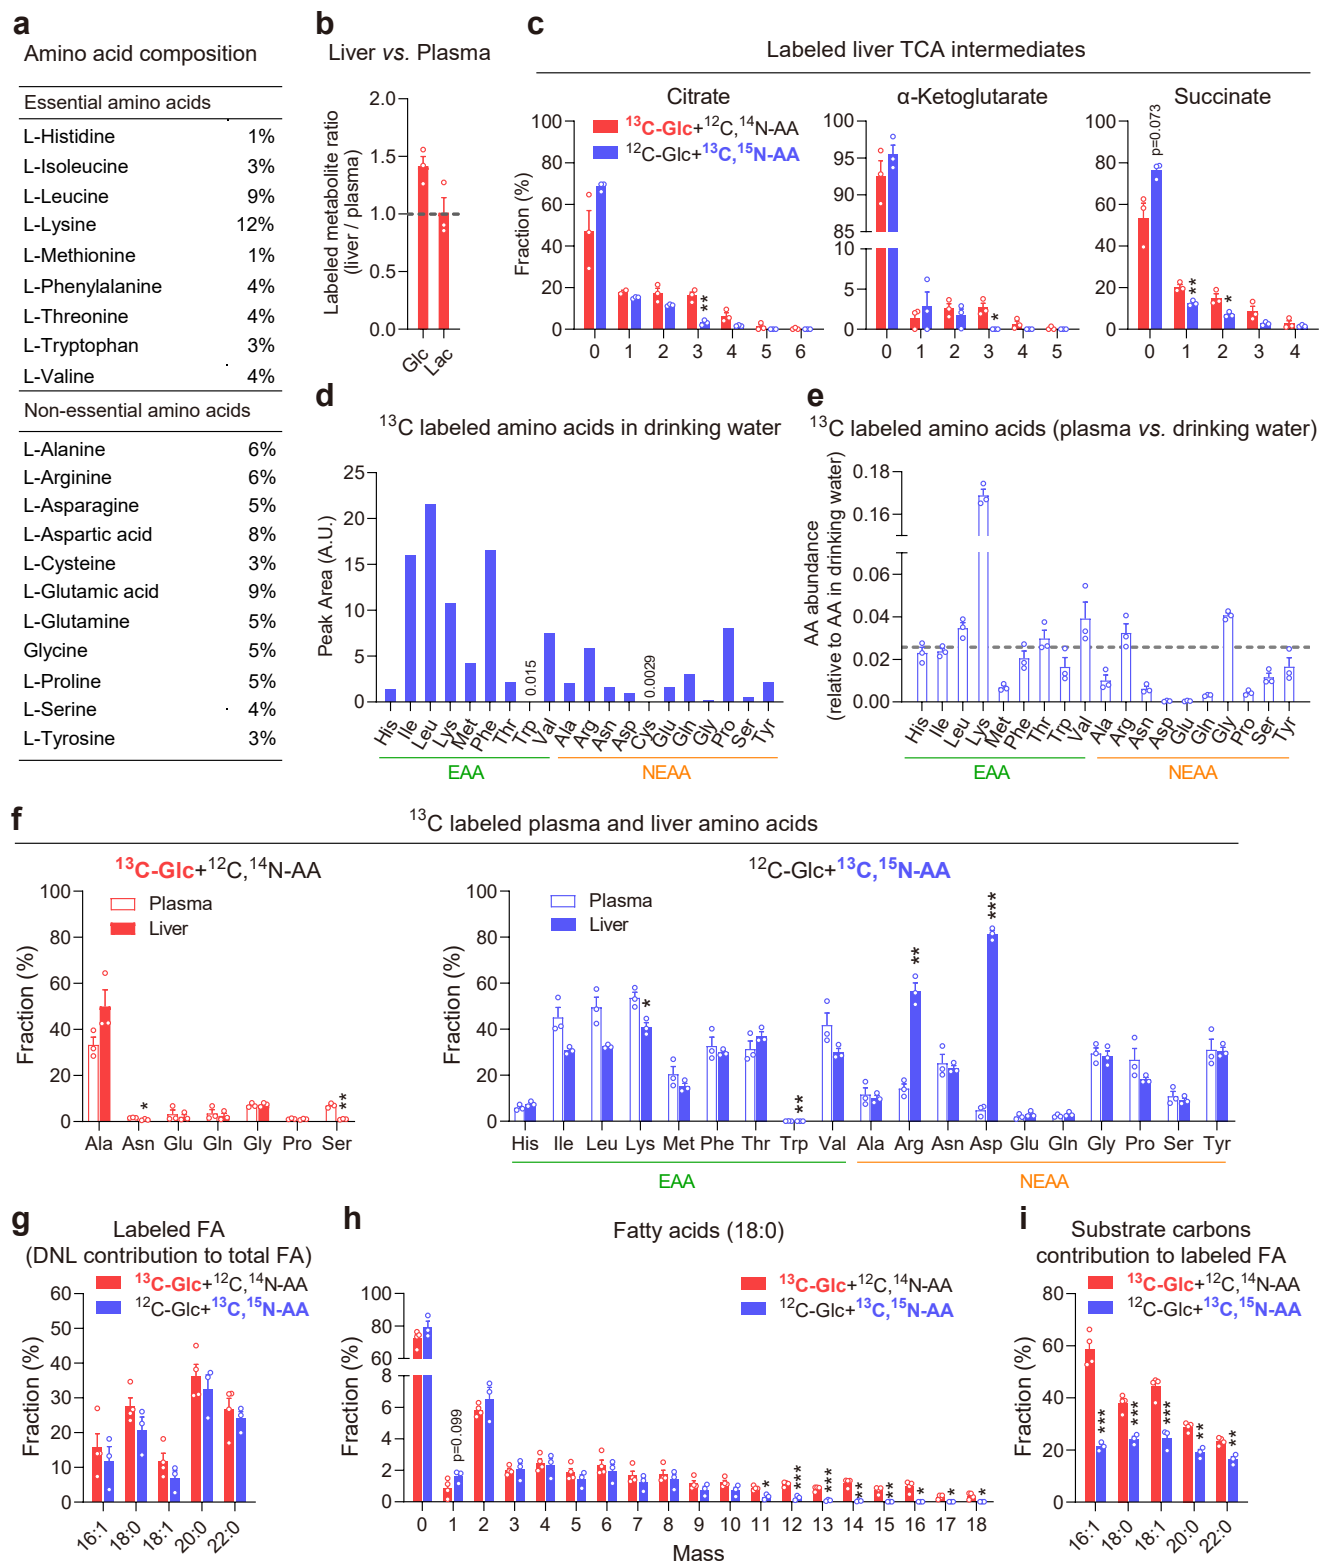

**Supplementary Figure 8. Related to Figure 5; *In vivo* metabolic flux of glucose and amino acids**

**a**, Composition of [U-<sup>13</sup>C,<sup>15</sup>N]amino acid mixture used for *in vivo* isotope tracing.

**b**, Ratio of <sup>13</sup>C labeled glucose and lactate in the liver and plasma.

**c**, Fractional abundance of <sup>13</sup>C labeled TCA cycle intermediates isotopomers traced with either [U-<sup>13</sup>C]glucose or [U-<sup>13</sup>C,<sup>15</sup>N]amino acids.

**d**, Relative abundance of amino acids in drinking water detected by LC-MS.

**e**, <sup>13</sup>C labeled amino acids abundance in plasma relative to that in drinking water (**d**).

**f**, Fractional abundance of <sup>13</sup>C labeled amino acids in plasma (open bar) and liver (solid bar) traced with either [U-<sup>13</sup>C]glucose (left) or [U-<sup>13</sup>C,<sup>15</sup>N]amino acid mixture (right). NEAA with labeling efficiency over 1% are presented.

**g, h**, Total (**g**) and separate (**h**) fractional abundance of <sup>13</sup>C labeled liver triglyceride fatty acids isotopomers.

**i**, Fractional abundance of the labeled carbons in the newly synthesized fatty acids (**i**).

Data are presented as means ± SEM; text labeled 0.05 < p < 0.1, \*p < 0.05, \*\*p < 0.01, \*\*\*p < 0.001 (Glc vs. AA). N.D., not detected.



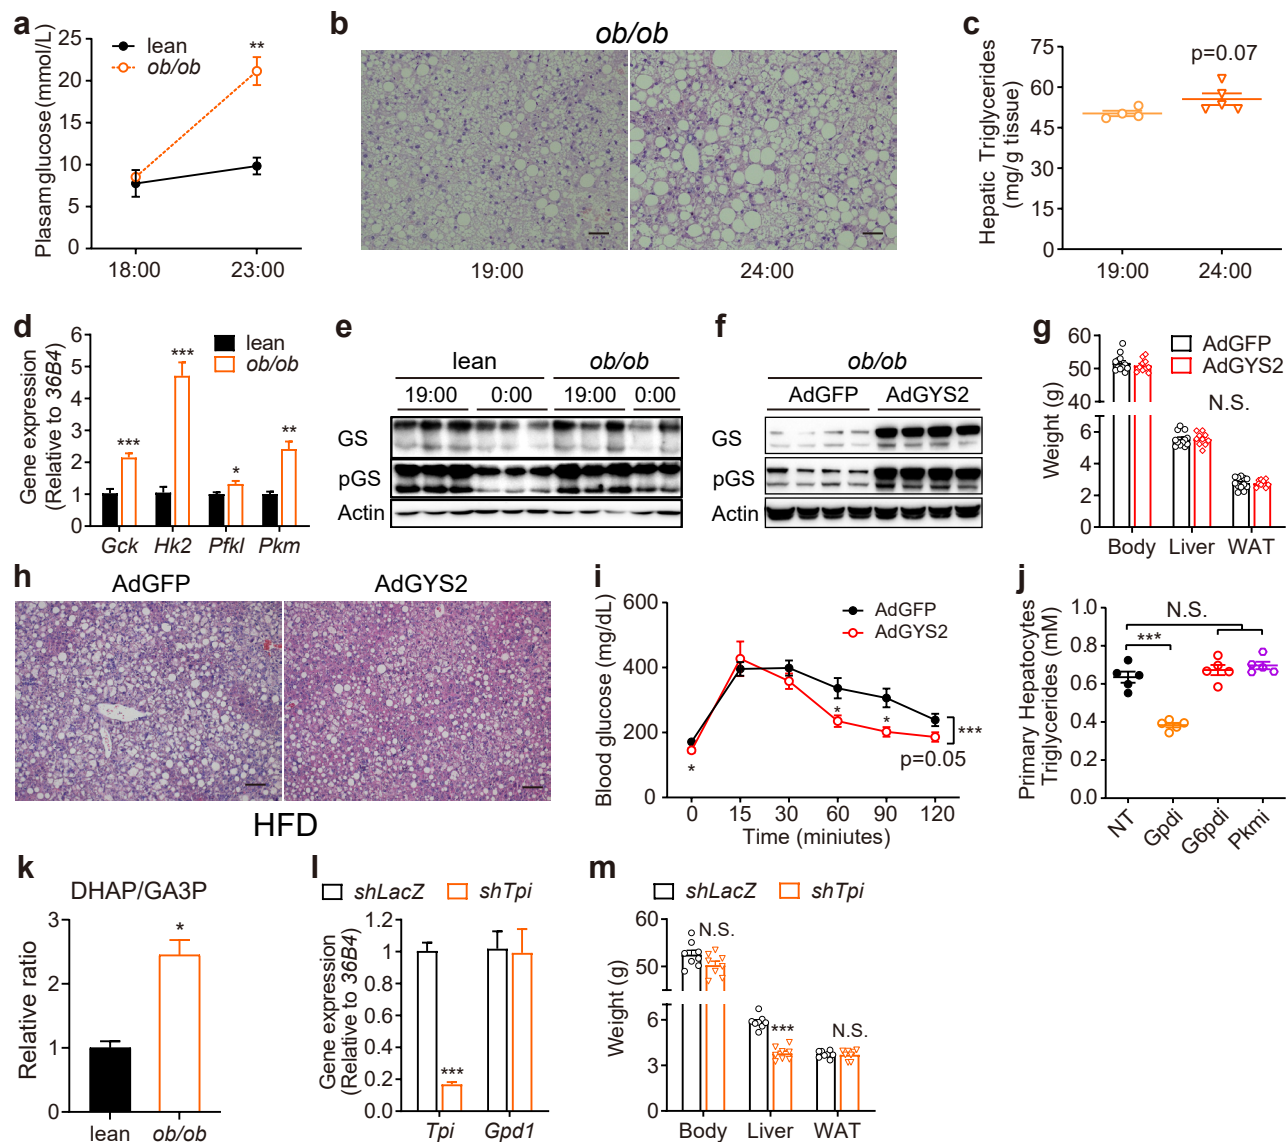

### Supplementary Figure 9. Related to Figure 6; Broad or specific inhibition of glycolytic glycerol-3P synthesis reduces hepatic triglyceride content

**a**, Measurement of changes in plasma glucose levels in lean and *ob/ob* mice in response to feeding. Lean and *ob/ob* mice were food withdrawn at ZT1 (7:00) and refed at ZT12 (18:00) for 6 hours.  $n=6$  for the lean, and 5 for the *ob/ob* group.

**b,c**, Hepatic lipid accumulation in *ob/ob* mice at ZT13 (19:00) and ZT18 (24:00) determined by H&E staining (**b**) and triglyceride measurement (**c**).  $n=4$  and 5 for the ZT13 and ZT18 group, respectively. Scale bars, 50  $\mu$ m.

**d**, Measurement of glycolytic gene expression by qPCR in the liver tissue samples from refed lean and *ob/ob* mice as in (**b**),  $n=5$ .

**e**, Immunoblot measurement of GYS2 protein levels and its phosphorylation state in the liver tissue samples prepared from lean and *ob/ob* mice in response to fasting and refeeding as in (**b**).

**f**, GYS2 expression in primary hepatocytes prepared from *ob/ob* mice transduced with adenovirus expressing either GYS2 or control GFP.

**g**, Body, liver and white adipose tissue (WAT) weight of the mice with GFP and GYS2 overexpression as described in Figure 5d-e.

**h**, H&E staining of liver tissue samples from high-fat diet (HFD) mice transduced with adenoviruses expressing either GYS2 or control GFP. Tissue samples were collected 12 days post adenovirus administration. Scale bars, 50  $\mu$ m.

**i**, Glucose tolerance test (GTT, 2 g kg<sup>-1</sup>) of HFD mice with liver-specific expression of either GYS2 or control GFP seven days post adenovirus transduction.  $n=7$  and 6 for the GYS2 and GFP groups respectively.

**j**, Triglyceride measurements of primary hepatocytes cultured in the presence or absence of inhibitors targeting GPD (ginkgolic acid 15:1, 10  $\mu$ M), G6PD (6-aminonicotinamide, 1 M), or PKM (Compound 3K, 20  $\mu$ M) for 24 hours,  $n=5$ .

**k**, The relative abundance of DHAP over GA3P in *ob/ob* primary hepatocytes compared to the lean (calculated from flux data of Fig. 1).

**l**, Measurement of *Tpi* transcript levels in *ob/ob* mice liver samples expressing shRNA targeting either *Tpi* (*shTpi*) or control (*shLacZ*),  $n=4$ .

**m**, Body, liver and white adipose tissue (WAT) weight of the mice in (**l**) and Figure 6f-g.

All measurements are presented as means  $\pm$  SEM; \* $p < 0.05$ , \*\* $p < 0.01$ , \*\*\* $p < 0.001$ , two-tailed unpaired Student's *t*-test. N.D., not detected. N.S., not significant.

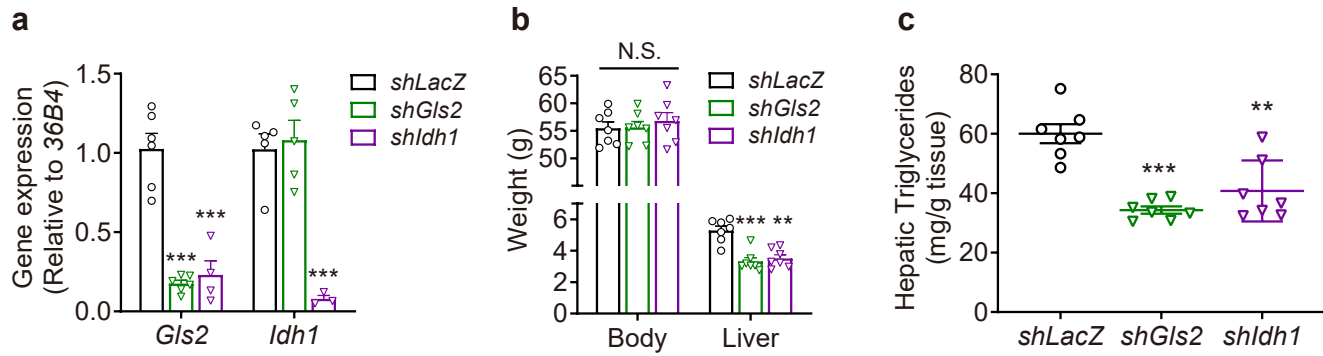

**Supplementary Figure 10. Related to Figure 7; Broad and pathway-specific manipulation of glutamine metabolism alleviates hepatic steatosis**

**a**, Measurement of *Gls2* and *Idh1* transcript levels in the *ob/ob* mice with liver-specific expression of shRNA targeting *LacZ*, *Gls2* and *Idh1* mediated by adenovirus for 9 days, n=6 for shLacZ and shGls2, n=4 for shldh1.

**b**, Body and liver weight of liver tissues from shLacZ control, shGls2 and shldh1 *ob/ob* mice as in (a), n=7.

**c**, Triglyceride measurement of liver tissues from shLacZ control, shGls2 and shldh1 *ob/ob* mice as in (a), n=7.

All measurements are presented as means  $\pm$  SEM; \*p < 0.05, \*\*p < 0.01, \*\*\*p < 0.001, two-tailed unpaired Student's *t*-test. N.S., not significant.

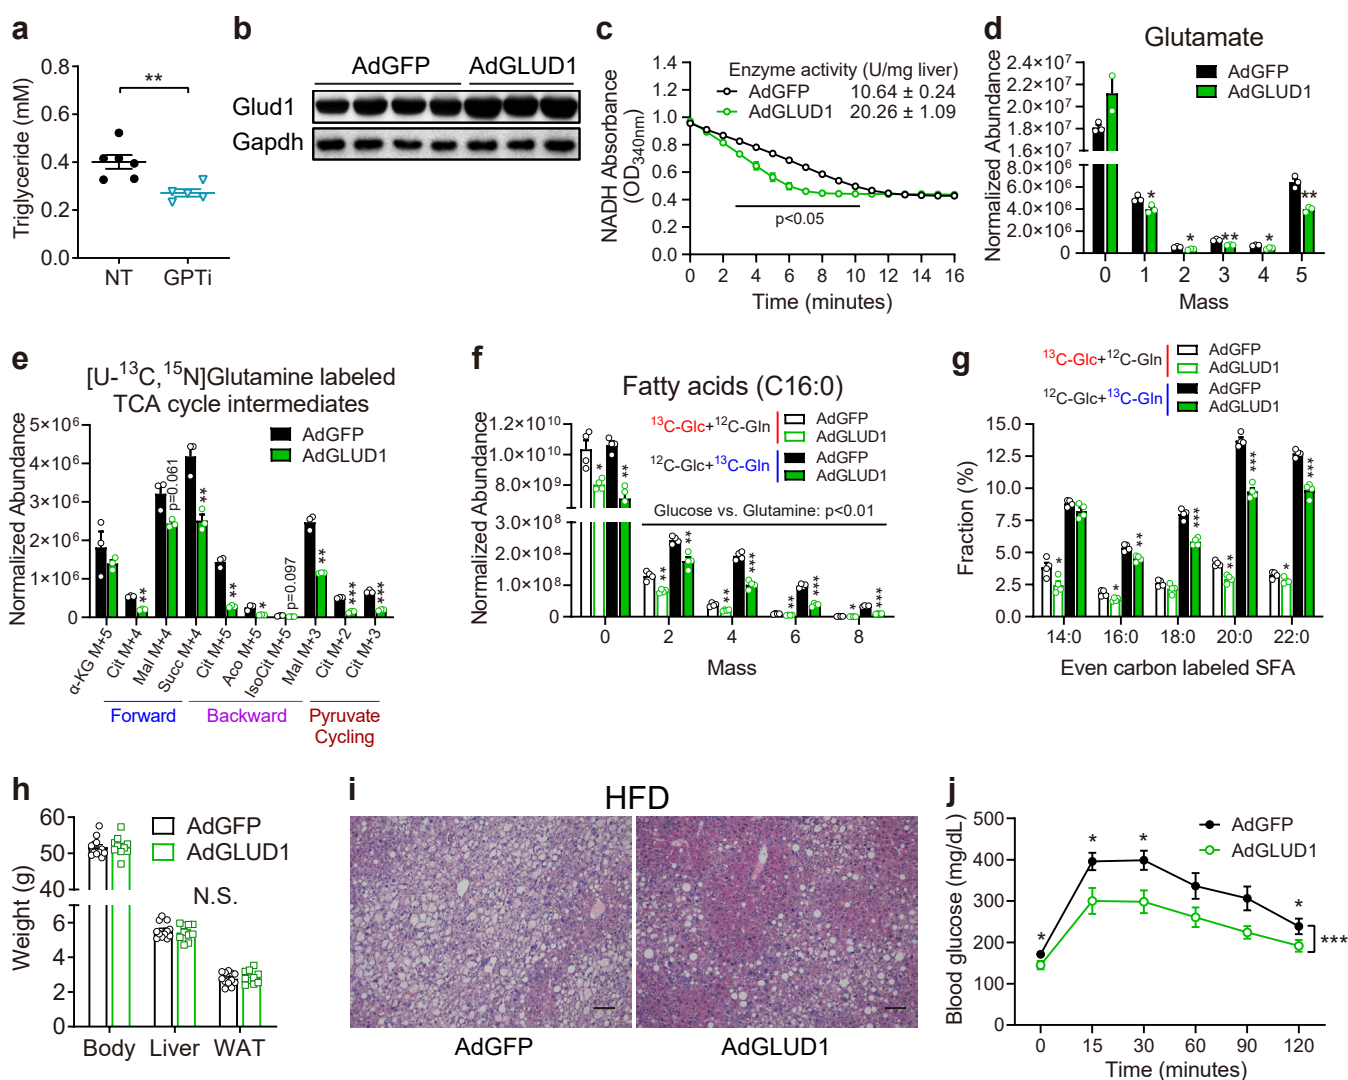

### Supplementary Figure 11. Related to Figure 7; Broad and pathway-specific manipulation of glutamine metabolism alleviates hepatic steatosis

- a**, Triglyceride measurements of primary hepatocytes cultured in the presence or absence of GPT inhibitor (3-chloro-L-alanine, 40 mM; n=5).
- b**, Immunoblot measurement of GLUD1 expression in the *ob/ob* mice liver transduced with adenoviruses expressing either GLUD1 (AdGLUD1) or GFP (AdGFP). Tissue samples were collected seven days post adenovirus transduction.
- c**, Measurement of GLUD1 enzyme activity from tissue samples prepared as in (b), n=3.
- d,e**, Abundance of glutamate isotopomers (d) and <sup>13</sup>C-labeled TCA intermediates (e) in [U-<sup>13</sup>C, <sup>15</sup>N]Gln-traced (1 hour) primary hepatocytes prepared from *ob/ob* mice expressing either GFP (AdGFP, control) or GLUD1 (AdGLUD1). Primary hepatocytes were isolated three days post adenovirus transduction. Peak areas were normalized to protein levels, n=3.
- f**, Abundance of <sup>13</sup>C-labeled triglyceride palmitate isotopomers in either [U-<sup>13</sup>C]Glc or [U-<sup>13</sup>C, <sup>15</sup>N]Gln-traced (6 hours) primary hepatocytes. Peak areas were normalized to protein levels.
- g**, Fractional abundance of <sup>13</sup>C-labeled triglyceride fatty acid species compared to their corresponding total pool.
- h**, Body, liver and white adipose tissue (WAT) weight of the mice in (c) and Figure 6j-l (n=12 and 10, the AdGFP control group is shared with Supplementary Fig. 8g).
- i**, H&E staining of liver sections from HFD mice expressing either GFP or GLUD1 (n=12 and 10, the control group is shared with Supplementary Fig. 8h). Scale bars, 50 μm.
- j**, GTT (2 g kg<sup>-1</sup> glucose) of HFD mice with liver-specific expression of GFP or GLUD1. The test was performed seven days post adenovirus administration after an overnight fasting, n=7 and 8 for the control and GLUD1 group respectively.

## Supplementary Table 1

| Reactions                                          | Glucose Tracing |       | Glutamine Tracing |       |                   |        |
|----------------------------------------------------|-----------------|-------|-------------------|-------|-------------------|--------|
|                                                    | Minimal (Glc)   |       | Minimal (Gln)     |       | Complete (Glc+AA) |        |
|                                                    | lean            | ob/ob | lean              | ob/ob | lean              | ob/ob  |
| Glycolysis (Glc→Pyr)                               | 10.52           | 17.57 | 3.60              | 3.60  | 6.27              | 19.88  |
| LDH (Pyr→Lac)                                      | 1.32            | 2.82  | 4.15              | 3.38  | 3.25              | 7.87   |
| GLS (Gln→Glu)                                      | 21.58           | 26.52 | 12.44             | 21.74 | 20.39             | 17.59  |
| GDH (Glu→ $\alpha$ -KG)                            | 19.78           | 24.72 | 4.93              | 10.53 | 18.59             | 15.79  |
| GDH Reverse ( $\alpha$ -KG→Glu)                    | 7.41            | 1.40  | 55.37             | 41.13 | 2.89              | 17.40  |
| PC (Pyr+CO <sub>2</sub> →OAA)                      | 8.33            | 5.10  | 18.37             | 10.67 | 6.81              | 28.07  |
| PDH/CS (Pyr+OAA→Cit+CO <sub>2</sub> )              | 5.60            | 22.53 | 4.08              | 7.05  | 13.17             | 7.51   |
| IDH (Cit→ $\alpha$ -KG+CO <sub>2</sub> )           | -11.74          | -1.51 | -0.13             | -0.05 | -0.74             | -9.03  |
| IDH Reverse ( $\alpha$ -KG+CO <sub>2</sub> →Cit)   | 16.36           | 22.04 | 8.06              | 12.22 | 6.89              | 29.81  |
| AKGDH/SDH/FUS ( $\alpha$ -KG→Mal+CO <sub>2</sub> ) | 8.04            | 23.21 | 4.80              | 10.48 | 17.85             | 6.76   |
| MDH (Mal→OAA)                                      | 3.31            | 10.32 | -14.29            | -3.62 | -2.70             | -25.58 |
| MDH Reverse (OAA→Mal)                              | 16.98           | 15.98 | 32.02             | 51.54 | 21.19             | 35.19  |
| ME/PEPCK (Mal→Pyr+CO <sub>2</sub> )                | 4.73            | 12.88 | 23.30             | 21.21 | 20.55             | 32.34  |
| ACLY (Cit→AcCoA+OAA)                               | 17.34           | 24.04 | 4.21              | 7.10  | 13.92             | 16.54  |

**Supplementary table 1.** Best fit metabolic fluxes ( $\mu\text{mol/g cells/min}$ ) based on experimental results presented in Figure 1-3 and supplemental Figure 1-4. Flux analysis of minimal medium with multiple time points applied isotopically nonstationary <sup>13</sup>C-MFA (INST-MFA) method, while that of complete medium used conventional <sup>13</sup>C-MFA. Glutamate utilization by other undetected pathways were arbitrarily set as a minimal value (1.8  $\mu\text{mol/g cells/min}$ ). Analysis of glutamine tracing experiment in minimal medium set glycolysis influx rate as a low value (3.6  $\mu\text{mol/g cells/min}$ ). All the values are presented as net flux, unless specifically labeled as reverse reaction.
